# Supplementary material for: Thiolate-assisted copper(i) catalyzed C–S cross coupling of thiols with aryl iodides: scope, kinetics and mechanism
Source: Royal Society of Chemistry journal article supplement (doi:10.1039/d2nj00043a), 2022-01-01
Supplement: d2nj00043a1.pdf [file d2nj00043a1.pdf]

**Supporting Information**

**Thiolate-assisted Copper(I) Catalyzed C–S Cross Coupling of Thiols with  
Aryl Iodides: Scope and Mechanism**

**Sneha Prasad Bakare, Mahendra Patil\***

*UM-DAE Centre for Excellence in Basic Sciences, Nalanda, University of Mumbai,  
Vidyanagari Campus, Santacruz (East), Mumbai-400098, India*

\* Corresponding author. E-mail: *mahendra.patil@cbs.ac.in*

| Table of Contents                                                                                                              | Page<br>No. |
|--------------------------------------------------------------------------------------------------------------------------------|-------------|
| 1 Optimization chart                                                                                                           | S3          |
| 2 Determination of Reaction Order in iodobenzene                                                                               | S4          |
| 3 Determination of Reaction Order in 4-methylbenzenethiol                                                                      | S5          |
| 4 Kinetics Analysis Set-I: Initial rates for C-S coupling reaction between 4-methylbenzenethiol with substituted aryl iodides. | S6          |
| 5 Kinetics data for Hammett plot with the variation of aryl iodides                                                            | S7          |
| 6 Kinetics Analysis Set-II: Initial rates for C-S coupling reaction between substituted thiophenols with iodobenzene           | S8          |
| 7 Kinetics data for Hammett plot with the variation of thiophenols                                                             | S10         |
| 8 NMR spectra                                                                                                                  | S11         |
| 9 Figure S1: Optimized geometries of Cu complexes shown in Scheme 9                                                            | S53         |
| 10 Scheme S1: Reaction Profile diagram for pathway-I initiated by Cu(SPh)                                                      | S54         |
| 11 Scheme S2: Reaction Profile diagram for pathway-II initiated by [Cu(SPh) <sub>2</sub> ]K                                    | S54         |
| 12 Scheme S3: Reaction Profile diagram for pathway-III initiated by [Cu(SPh)(O <sup>t</sup> Bu)]K                              | S55         |
| 13 Scheme S4: Reaction Profile diagram for pathway-IV initiated by Cu <sub>2</sub> [μ-( <sup>t</sup> BuO) <sub>2</sub> ]       | S55         |
| 14 Scheme S5: Reaction Profile diagram for pathway-V (Solvent Assisted).                                                       | S56         |
| 15 Scheme S6: Reaction Profile diagram for pathway-VI (Solvent Assisted).                                                      | S56         |
| 16 Optimized geometries (M062X, Cartesian coordinates in Å) and energies of reactants transition state and intermediates.      | S57         |

## 1. Optimization chart

**Table S1:** Screening of solvents and optimization of reaction conditions.

| Entry     | Solvent                         | Base                           | Time (hrs) | Yield (%) (3a) |
|-----------|---------------------------------|--------------------------------|------------|----------------|
| 1         | H <sub>2</sub> O                | KOH                            | 16         | 66             |
| 2         | H <sub>2</sub> O                | K <sub>3</sub> PO <sub>4</sub> | 16         | 6              |
| 3         | H <sub>2</sub> O                | K <sub>2</sub> CO <sub>3</sub> | 16         | 11             |
| 4         | H <sub>2</sub> O                | KO <sup>t</sup> Bu             | 16         | 44             |
| 5         | DME                             | KO <sup>t</sup> Bu             | 16         | 61             |
| 6         | H <sub>2</sub> O+DME (1:9)      | KO <sup>t</sup> Bu             | 16         | 77             |
| <b>7</b>  | <b>H<sub>2</sub>O+DME (1:4)</b> | <b>KO<sup>t</sup>Bu</b>        | <b>16</b>  | <b>83</b>      |
| 8         | H <sub>2</sub> O+DME (3:7)      | KO <sup>t</sup> Bu             | 16         | 78             |
| 9         | H <sub>2</sub> O+DME (2:3)      | KO <sup>t</sup> Bu             | 16         | 69             |
| 10        | H <sub>2</sub> O+DME (1:1)      | KO <sup>t</sup> Bu             | 16         | 62             |
| 11        | H <sub>2</sub> O+DME (1:4)      | KO <sup>t</sup> Bu             | 4          | 77             |
| 12        | Ethanol                         | KO <sup>t</sup> Bu             | 4          | 77             |
| <b>13</b> | <b>Ethanol</b>                  | <b>KO<sup>t</sup>Bu</b>        | <b>8</b>   | <b>78</b>      |
| 14        | Methanol                        | KO <sup>t</sup> Bu             | 4          | 68             |
| 15        | Butanol                         | KO <sup>t</sup> Bu             | 4          | 48             |
| 16        | H <sub>2</sub> O/Ethanol (1:4)  | KO <sup>t</sup> Bu             | 4          | 66             |
| 17        | H <sub>2</sub> O/Butanol (1:4)  | KO <sup>t</sup> Bu             | 4          | 59             |
| 18        | DME/Ethanol (1:4)               | KO <sup>t</sup> Bu             | 4          | 64             |
| 19        | THF/Ethanol (1:4)               | KO <sup>t</sup> Bu             | 4          | 20             |
| 20        | DMSO                            | KO <sup>t</sup> Bu             | 4          | 54             |
| 21        | DMF                             | KO <sup>t</sup> Bu             | 4          | 62             |
| 22        | CH <sub>3</sub> CN              | KO <sup>t</sup> Bu             | 4          | 60             |

**Reaction conditions:** **1** (0.5 mmol), **2** (0.62 mmol), CuI (0.025 mmol= 5 mol%), base (1 mmol), solvent (250  $\mu$ L), 100  $^{\circ}$ C, N<sub>2</sub> atm.

## 2. Kinetic study

**Table S2:** Yield of **3a** (%) in 20% H<sub>2</sub>O/DME and ethanol

| Entry | Time (hrs) | Yield (%)                                   | Yield (%)                  |
|-------|------------|---------------------------------------------|----------------------------|
|       |            | ( <b>3a</b> )<br>(20% H <sub>2</sub> O/DME) | ( <b>3a</b> )<br>(Ethanol) |
| 1     | 1          | 17                                          | 65                         |
| 2     | 2          | 47                                          | 73                         |
| 3     | 3          | 72                                          | 76                         |
| 4     | 4          | 77                                          | 77                         |
| 5     | 5          | 78                                          | 78                         |
| 6     | 6          | 78                                          | 78                         |

**Reaction conditions:** **1** (0.5 mmol), **2** (0.62 mmol), CuI (0.025 mmol= 5 mol%), base (1 mmol), solvent (250  $\mu$ L), 100  $^{\circ}$ C, N<sub>2</sub> atm.

## 3. Determination of Reaction Order in iodobenzene: Coupling of 4-methylbenzenethiol with iodobenzene using different concentrations.

**Table S3.** Yield of **4a** (%) with variation in concentration of iodobenzene (**2**).

| 4-methylthiophenol (mmol) | <b>2</b> (mmol) | [ <b>2</b> ] / M | Yield <b>4a</b> (%) <sup>a</sup> | Rate (mM/min) |
|---------------------------|-----------------|------------------|----------------------------------|---------------|
| 0.5                       | 0.375           | 1.5              | 42                               | 6.95          |
| 0.5                       | 0.5             | 2                | 48                               | 7.95          |
| 0.5                       | 0.62            | 2.48             | 54                               | 9.00          |
| 0.5                       | 0.75            | 3                | 56                               | 9.22          |

<sup>a</sup> Yield (%) is calculated with respect to the 4-methylthiophenol.

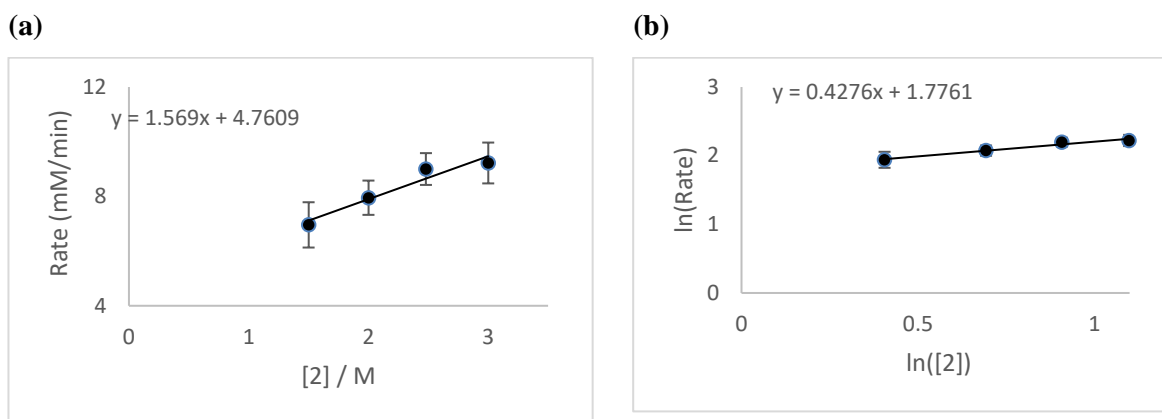

**Figure S1:** The plot of (a) Rate (M/s) vs concentration of iodobenzene [2], (b) ln(Rate) vs ln[2].

#### 4. Determination of Reaction Order in 4-methylbenzenethiol: Coupling of different concentrations of 4-methylbenzenethiol with iodobenzene.

**Table S4.** Yield of **4a** (%) with variation in concentration of 4-methylbenzenethiol.

| 4-methylthiophenol (mmol) | <b>2</b> (mmol) | [4-methylbenzenethiol] / M | Yield <sup>a</sup> <b>4a</b> (%) | Rate (mM/min) |
|---------------------------|-----------------|----------------------------|----------------------------------|---------------|
| 0.5                       | 0.62            | 2                          | 54                               | 8.94          |
| 0.62                      | 0.62            | 2.48                       | 48                               | 9.93          |
| 0.75                      | 0.62            | 3                          | 44                               | 11.32         |

<sup>a</sup> Yield (%) is calculated with respect to the 4-methylthiophenol.

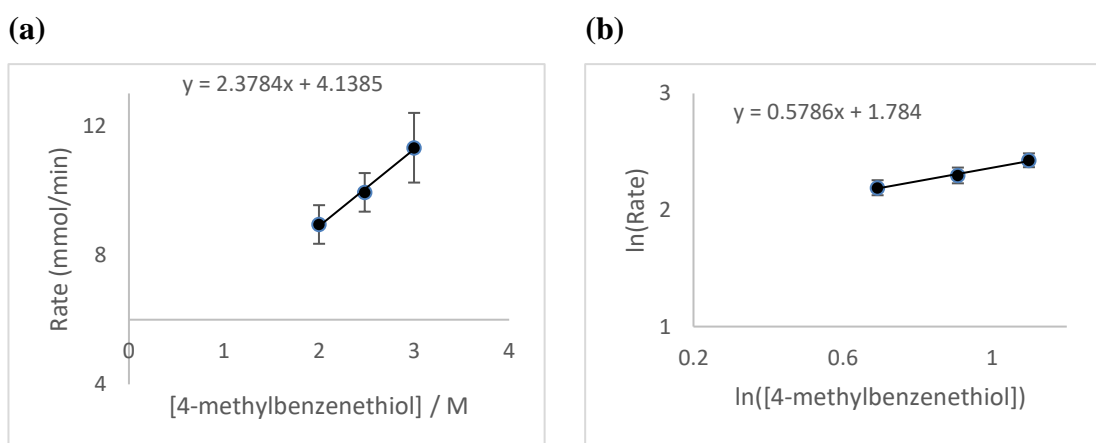

**Figure S2:** The plot of (a) Rate (M/s) vs concentration of 4-methylbenzenethiol, (b) ln(Rate) vs ln[4-methylbenzenethiol].

## 5. Kinetics Analysis Set-I: Initial rates for C-S coupling reaction between 4-methylbenzenethiol with substituted aryl iodides.

Reactions of 4-methylbenzenethiol with substituted aryl iodides were carried out in ethanol under standard reaction conditions. In each set of experiments, reactions were terminated at the interval of 30 min. for three hours duration and product yields were determined. It was difficult to determine the concentration of thiols because of salt formation in basic medium. Similarly, significant variations in concentration of aryl iodides were observed in these coupling reactions. Hence, initial rates were determined using product concentrations at stipulated time interval. Each reaction was repeated thrice to get reliable value of product concentration. Initial rates (mM/min) were determined using plot of product yield (mM) versus time (min). Simple linear regression graphs were obtained in Microsoft Excel. Hammett plot was generated by plotting logarithms of initial rates of coupling constant versus substituents constant. Initial rate of coupling reactions has often used in Hammett analysis.<sup>1</sup>

(a) Iodobenzene

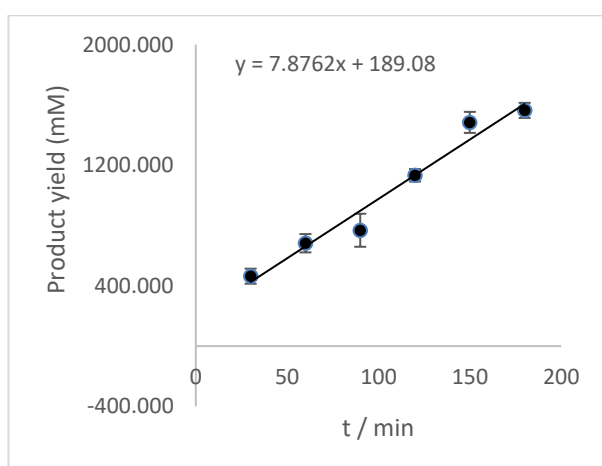

(b) 4-iodoanisole

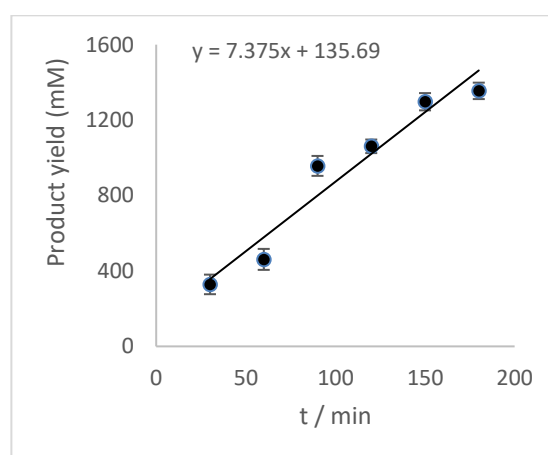

<sup>1</sup> (a) T. Ljungdahl, T. Bennur, A. Dallas, H. Emtenas, J. Martensson, *Organometallics*. 2008, **27**, 2490; (b) K. L. Hull, M. S. Sanford, *J. Am. Chem. Soc.* 2009, **131**, 9651; (c) A. M. Suess, M. Z. Ertem, C. J. Cramer, S. S. Stahl, *J. Am. Chem. Soc.* 2013, **135**, 9797; (d) J. M. Dennis, N. A. White, R. Y. Liu, S. L. Buchwald, *ACS Catal.* 2019, **9**, 3822.

**(c) 4-iodotoluene**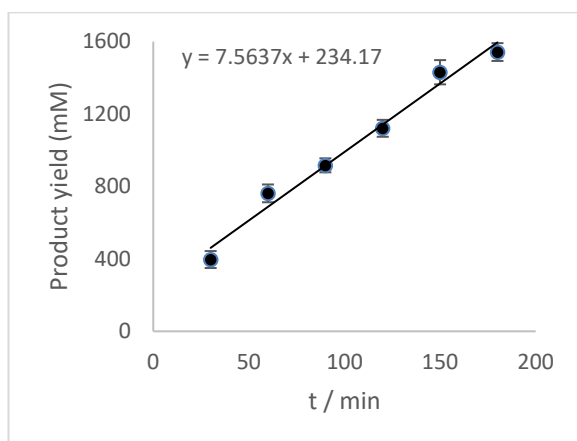**(d) 1-chloro-4-iodobenzene**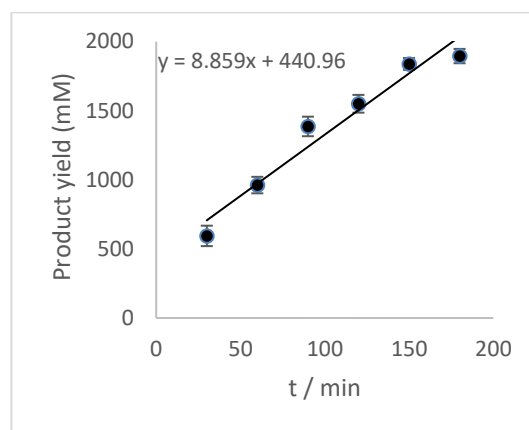**(e) 1-bromo-4-iodobenzene**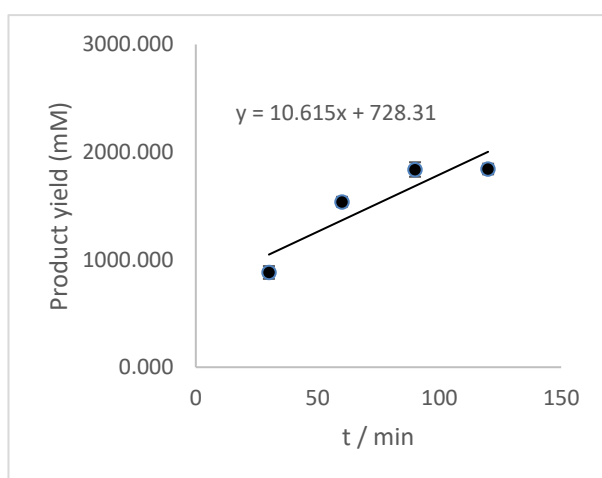

**Figure S3:** Initial rate for the reactions between 4-methylbenzenethiol with (a) Iodobenzene, (b) 4-iodoanisole, (c) 4-iodotoluene, (d) 1-chloro-4-iodobenzene, (e) 1-bromo-4-iodobenzene.

## 6. Kinetics data for the Hammett plot with the variation of Aryl iodides

**Table S4.** Hammett parameter, initial rate, and relevant calculated data for C-S coupling reaction between 4-methylbenzenethiol with substituted aryl iodides.

| Substrate              | Hammett<br>Parameter,<br>$\sigma_p$ | Initial rate<br>(mM/min) | $r_x/r_H$   | $\log(r_x/r_H)$ |
|------------------------|-------------------------------------|--------------------------|-------------|-----------------|
| Iodobenzene            | 0                                   | 7.87                     | 1           | 0               |
| 4-iodoanisole          | -0.37                               | 7.37                     | 0.936365252 | -0.02855        |
| 4-iodotoluene          | -0.17                               | 7.56                     | 0.960234631 | -0.01762        |
| 1-chloro-4-iodobenzene | 0.23                                | 8.85                     | 1.124780986 | 0.051068        |
| 1-bromo-4-iodobenzene  | 0.25                                | 10.61                    | 1.347731139 | 0.129603        |

## 7. Kinetics Analysis Set-II: Initial rates for C-S coupling reaction between substituted thiophenols with iodobenzene.

Reactions of substituted thiophenols with iodobenzene were carried out in ethanol under standard reaction conditions. In each set of experiments, reactions were terminated at the interval of 30 min. for three hours duration and product yields were determined. It was difficult to determine the concentration of thiols because of salt formation in basic medium. Similarly, significant variations in concentration of iodobenzene were observed in these coupling reactions. Hence, initial rates were determined using product concentrations at stipulated time interval. Each reaction was repeated thrice to get reliable value of product concentration. Initial rates (mM/min) were determined using plot of product yield (mM) versus time (min). Simple linear regression graphs were obtained in Microsoft Excel. Because of unavailability of unsubstituted benzenethiol, we could not determine kinetics data for reactions involving unsubstituted benzenethiol. Initial rate for the reaction of unsubstituted benzenethiol with iodobenzene was determined from plot of initial rates of derivatives of thiophenols versus substituent constant (Figure S5). From this graph, initial rate value corresponds to substituent constant value ( $\sigma = 0$ ) is considered as initial rate for the unsubstituted benzenethiol. Further, Hammett plot was generated by plotting logarithms of initial rates of coupling constant versus substituents constant. Initial rate of coupling reactions has often used in Hammett analysis.<sup>1</sup>

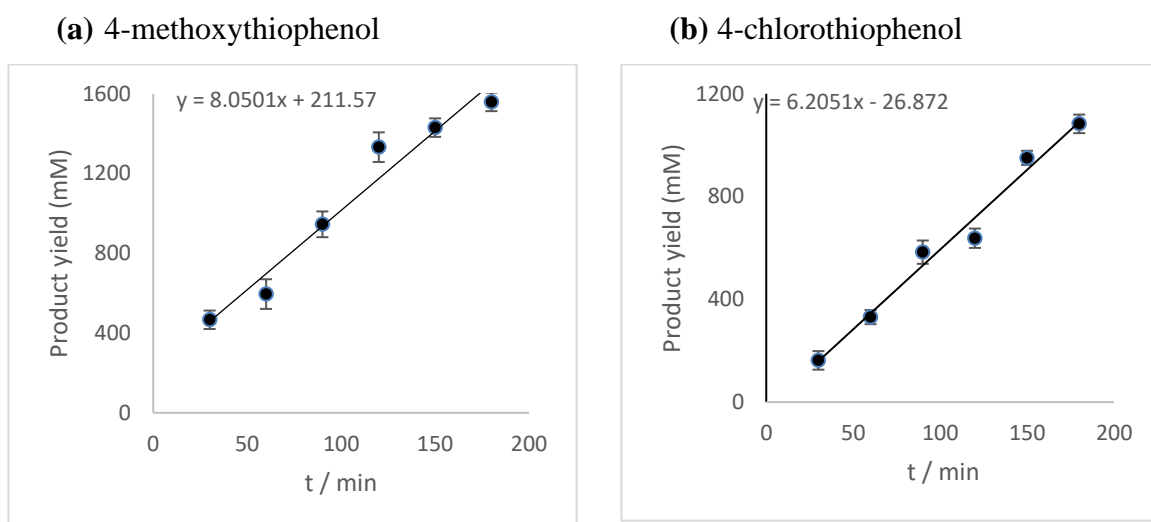



(c) 4-fluorothiophenol

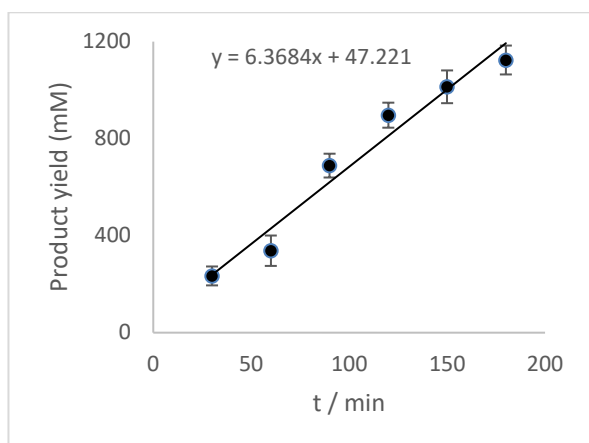

**Figure S4:** Initial rate for the reactions between (a) 4-methoxythiophenol, (b) 4-chlorothiophenol, (c) 4-fluorothiophenol with iodobenzene.

**Table S5:** Initial rate for the C–S coupling of substituted thiophenols with iodobenzene

| Substrate           | Initial Rate (mM/min) |
|---------------------|-----------------------|
| Thiophenol          | 6.97 (From Figure S5) |
| 4-methoxythiophenol | 8.05                  |
| 4-methylthiophenol  | 7.87                  |
| 4-chlorothiophenol  | 6.20                  |
| 4-fluorothiophenol  | 6.36                  |

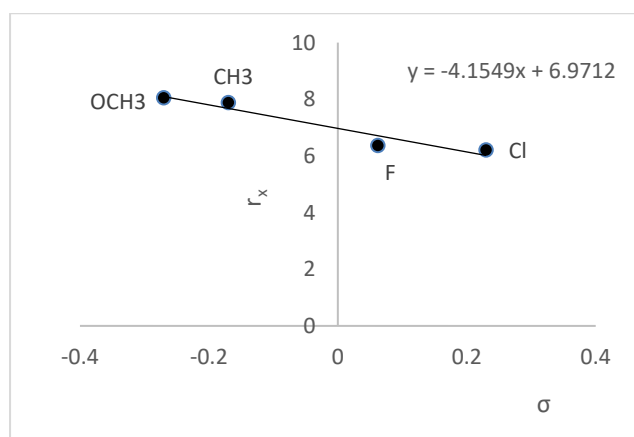

**Figure S5:** Plot of Initial rate ( $r_x$ ) versus substituent constant ( $\sigma$ ).

## 8. Kinetics data for the Hammett plot with the variation of thiophenols

**Table S6:** Hammett parameter, initial rate, and relevant calculated data for C-S coupling reaction between substituted thiophenols with iodobenzene.

| <b>Substrate</b>    | <b>Hammett<br/><math>\sigma_p</math><br/>parameter</b> | <b>Initial rate<br/>(mM/min)</b> | <b><math>r_x/r_H</math></b> | <b><math>\log(r_x/r_H)</math></b> |
|---------------------|--------------------------------------------------------|----------------------------------|-----------------------------|-----------------------------------|
| Thiophenol          | 0                                                      | 6.97                             | 1                           | 0                                 |
| 4-methoxythiophenol | -0.27                                                  | 8.05                             | 1.154765                    | 0.062494                          |
| 4-methylthiophenol  | -0.17                                                  | 7.87                             | 1.12982                     | 0.053009                          |
| 4-chlorothiophenol  | 0.23                                                   | 6.20                             | 0.890105                    | -0.05056                          |
| 4-fluorothiophenol  | 0.25                                                   | 6.36                             | 0.91353                     | -0.03928                          |

## 9. NMR spectra

$^1\text{H}$  NMR of (3a)

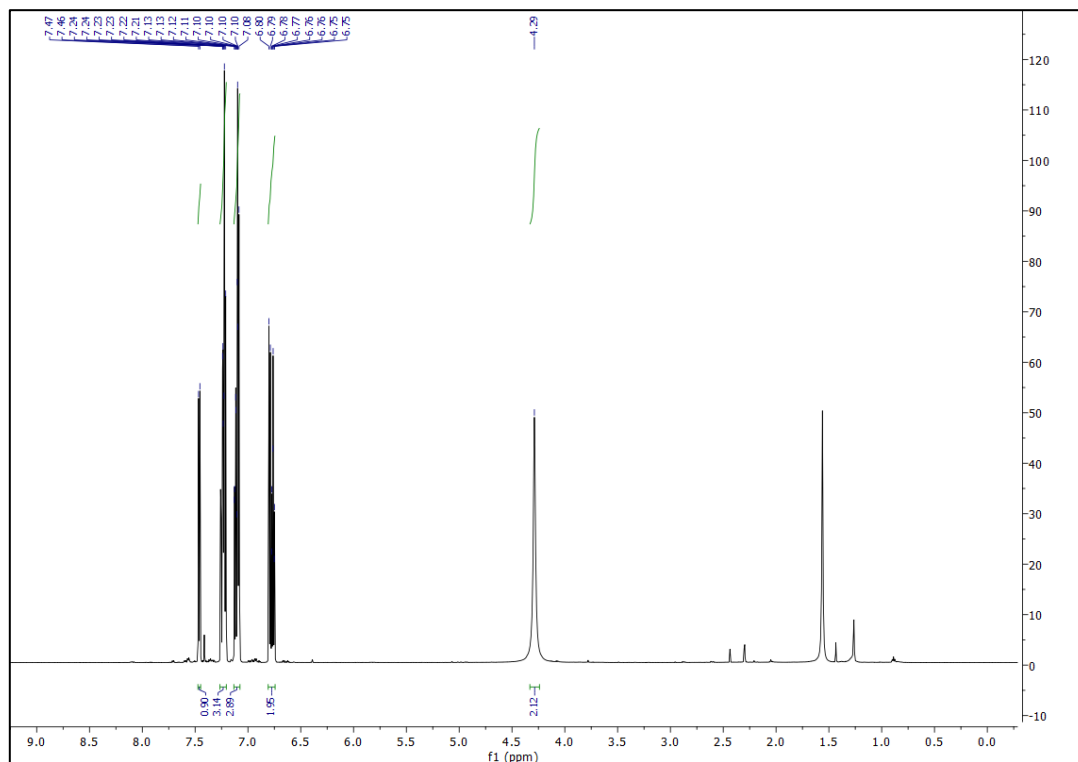

$^{13}\text{C}$  NMR of (3a)

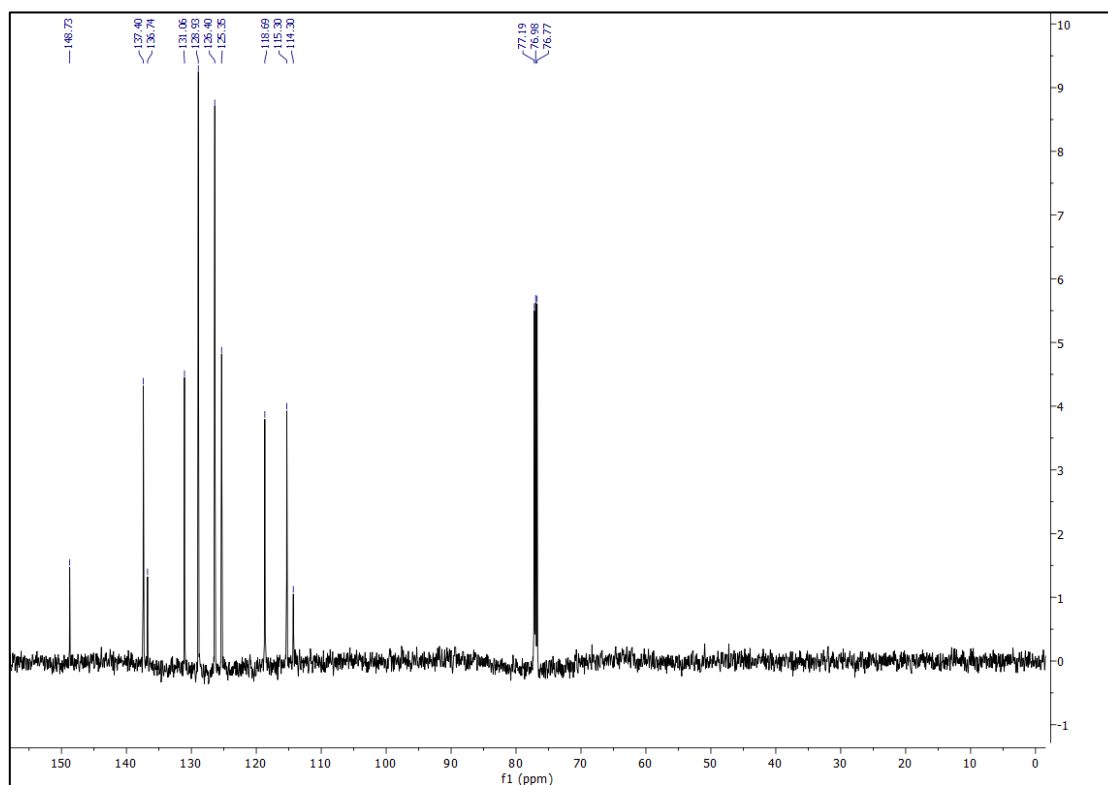

### $^1\text{H}$ NMR of (3b)

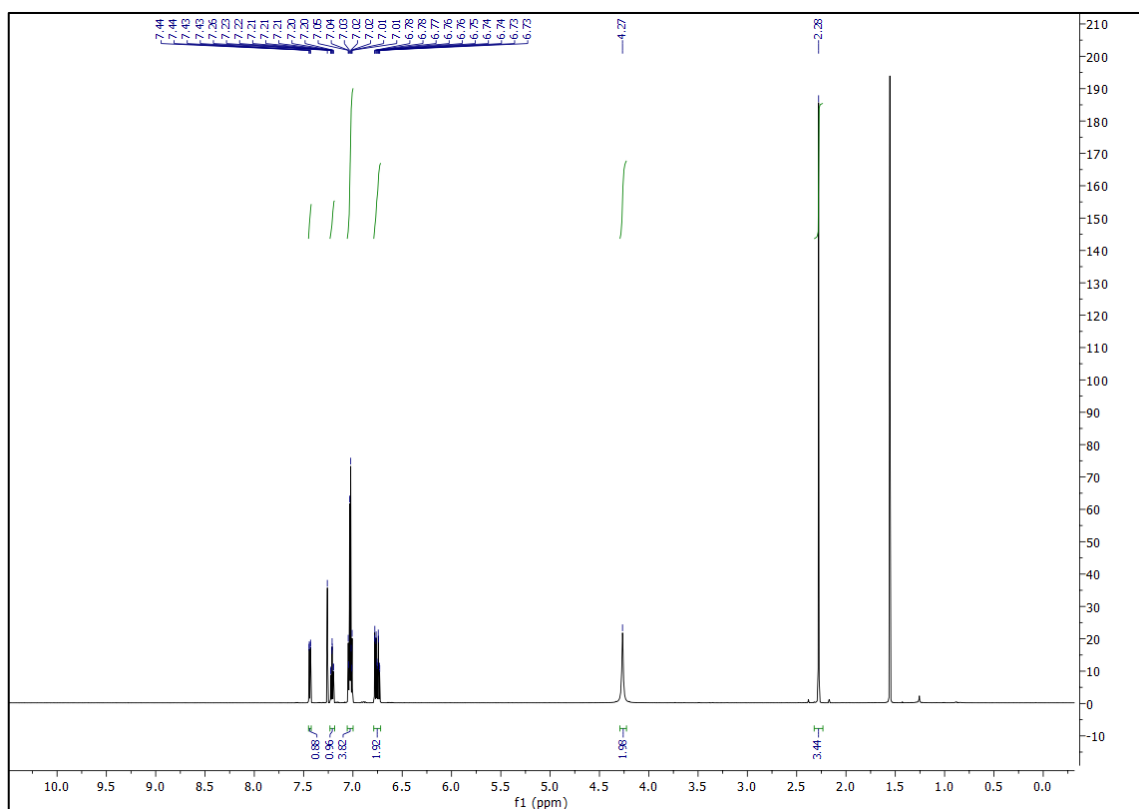

### $^{13}\text{C}$ NMR of (3b)

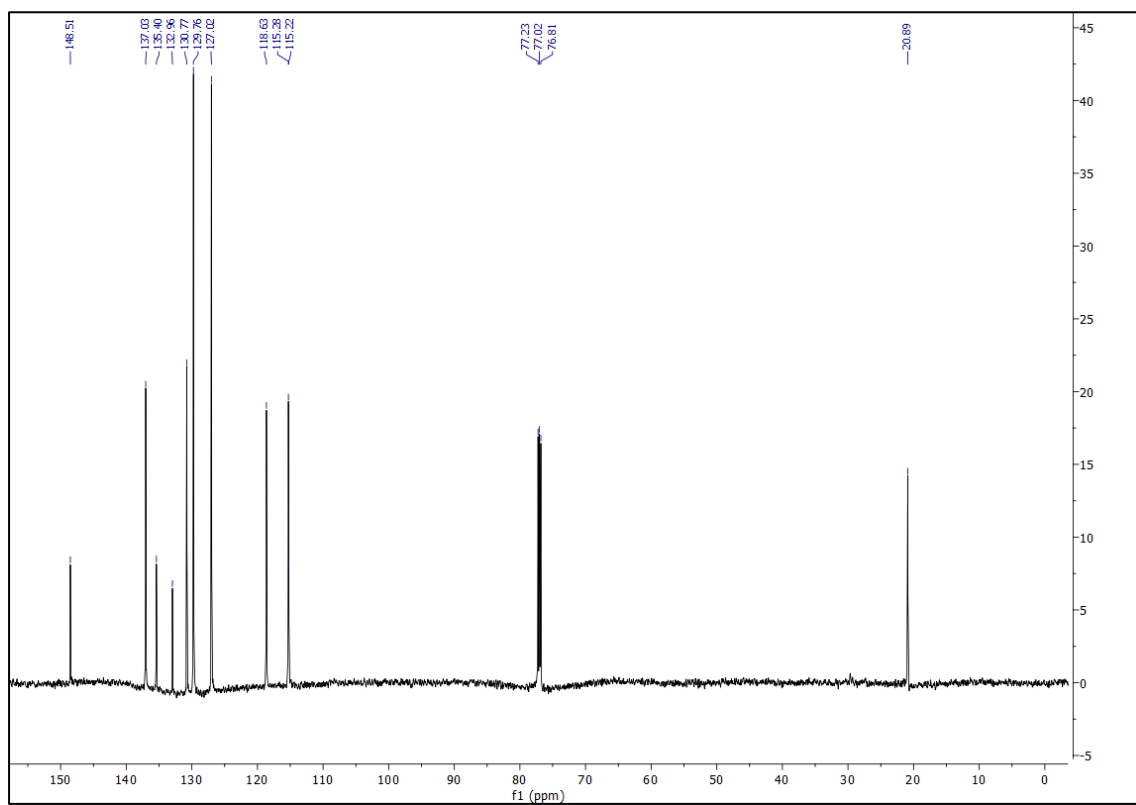

### $^1\text{H}$ NMR of (3c)

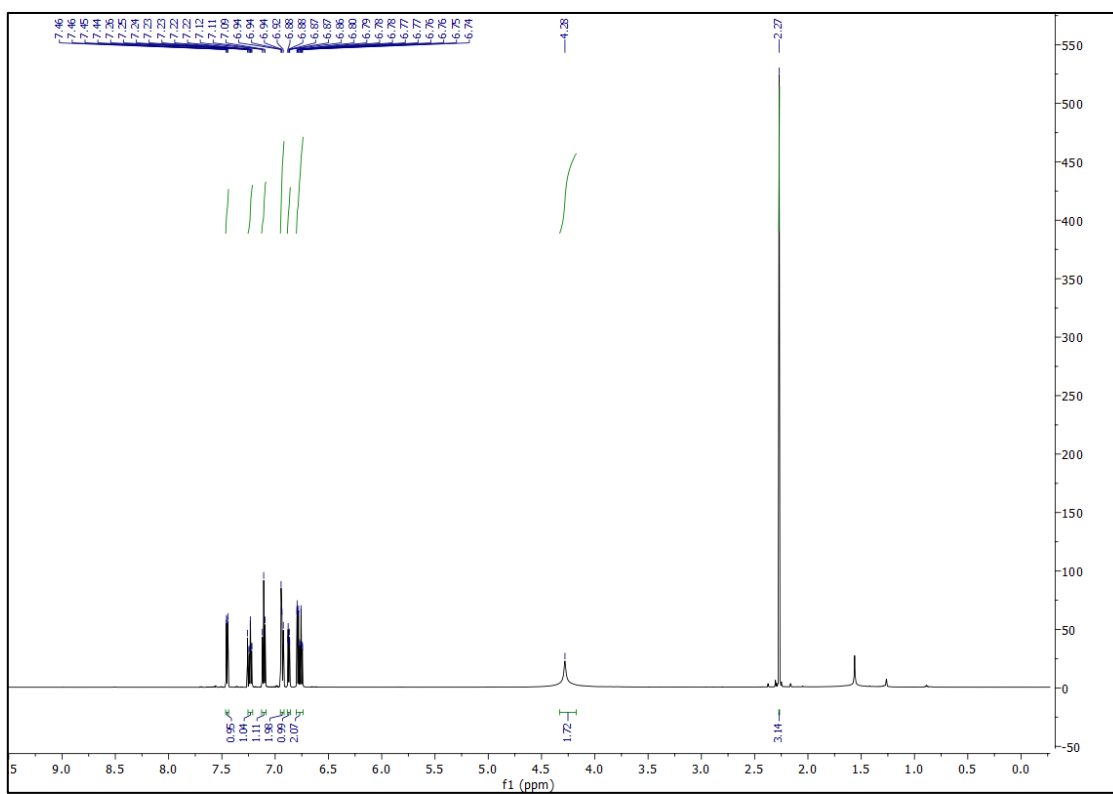

### $^{13}\text{C}$ NMR of (3c)

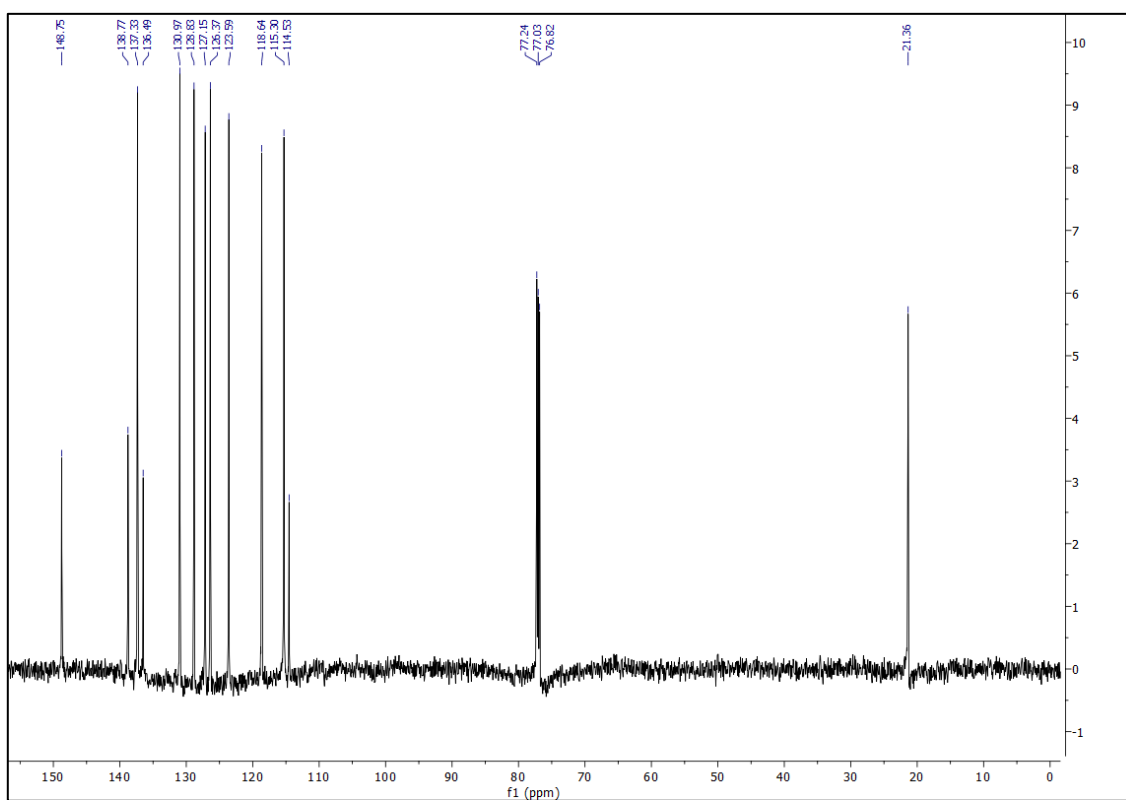

### $^1\text{H}$ NMR of (3d)

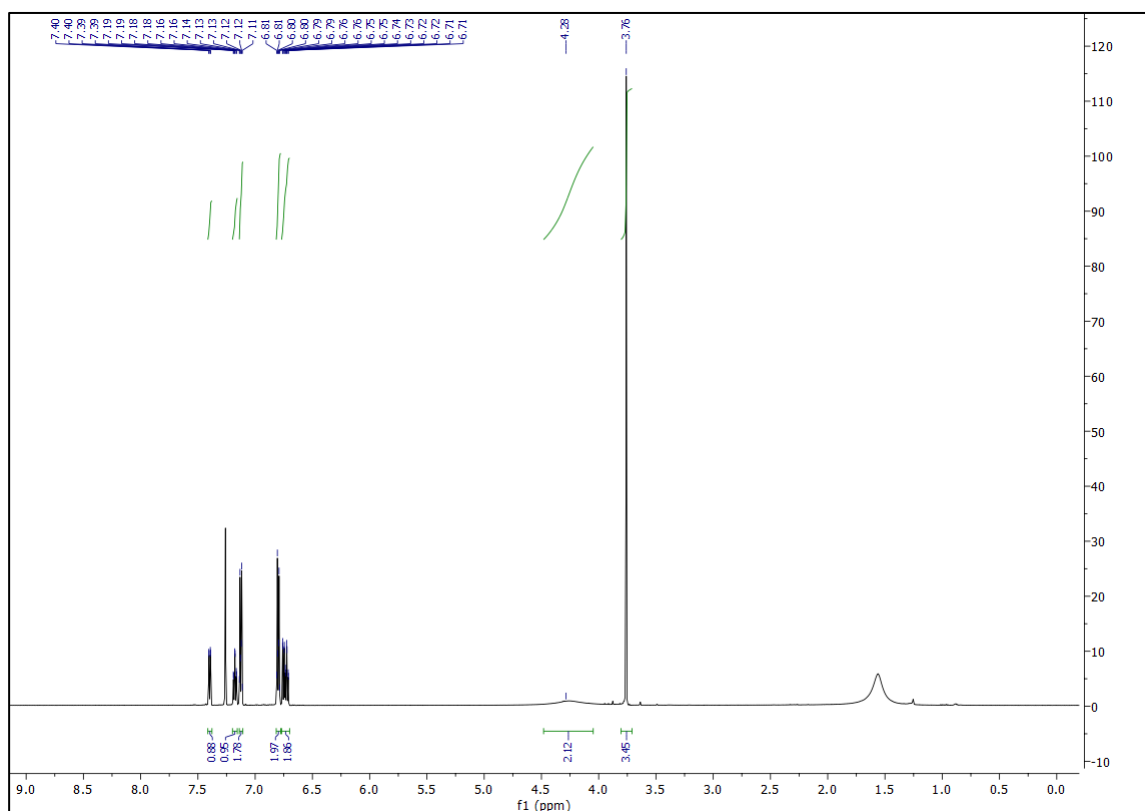

### $^{13}\text{C}$ NMR of (3d)

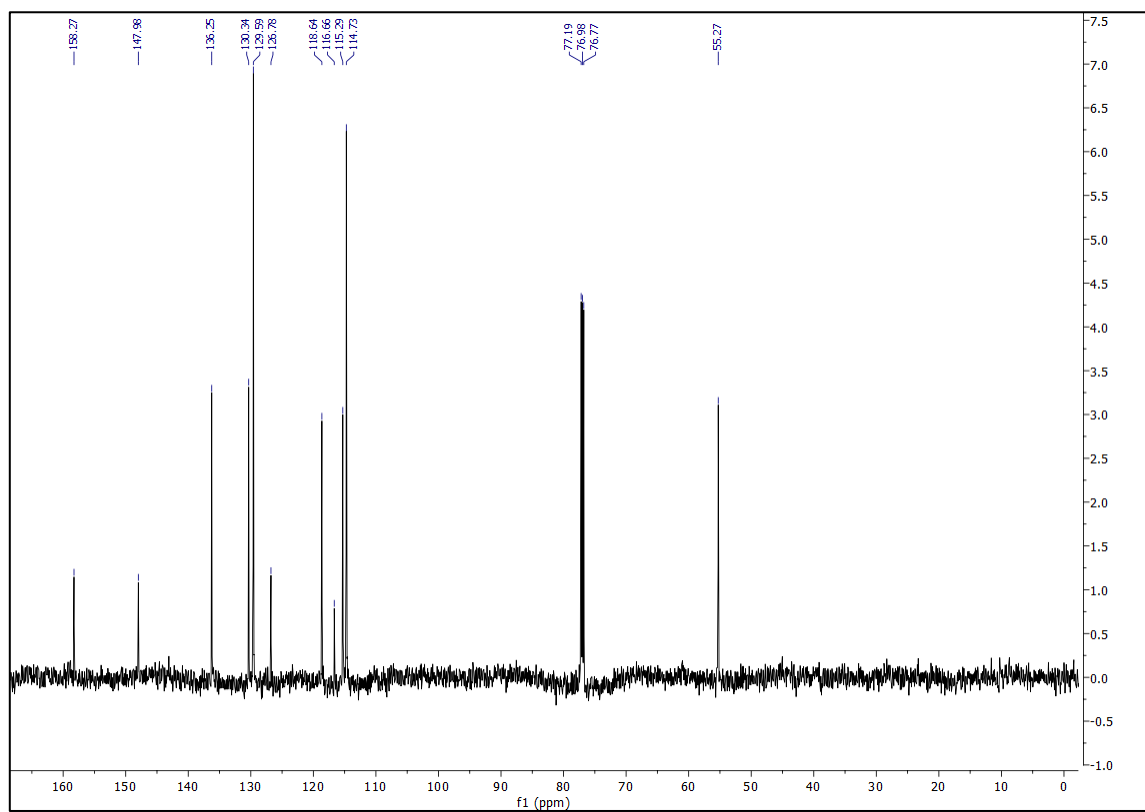

### $^1\text{H}$ NMR of (3e)

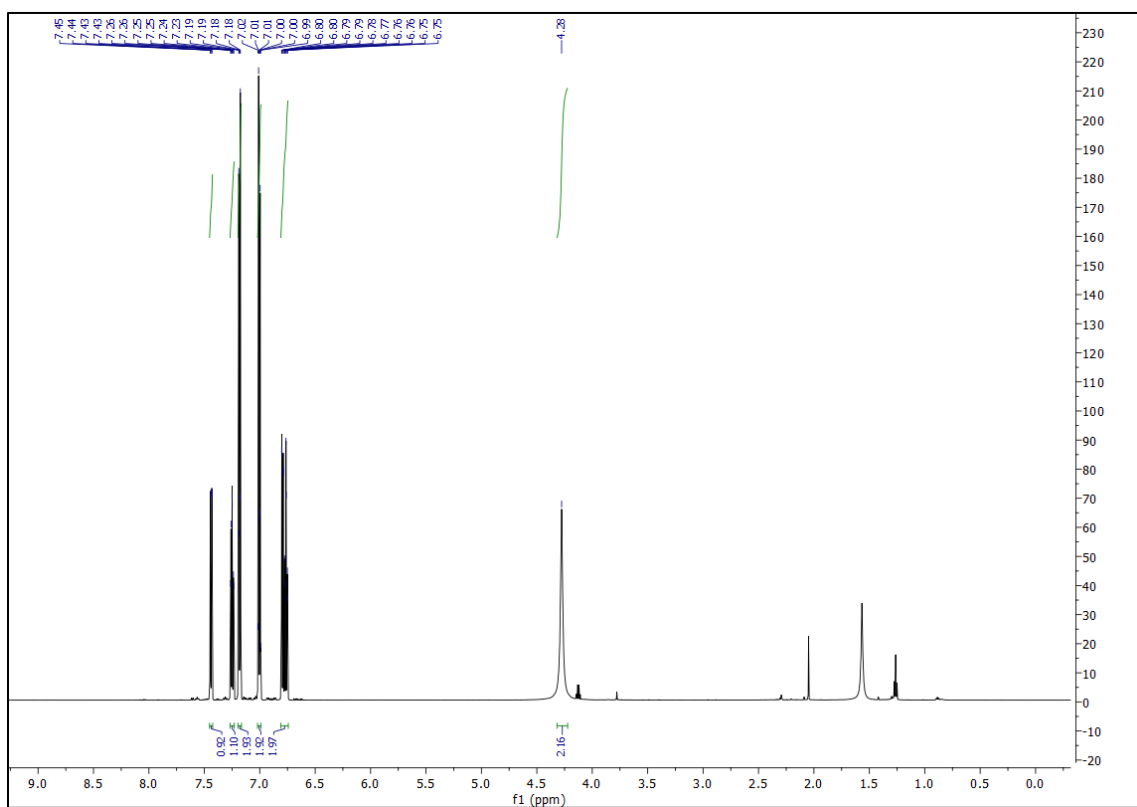

### $^{13}\text{C}$ NMR of (3e)

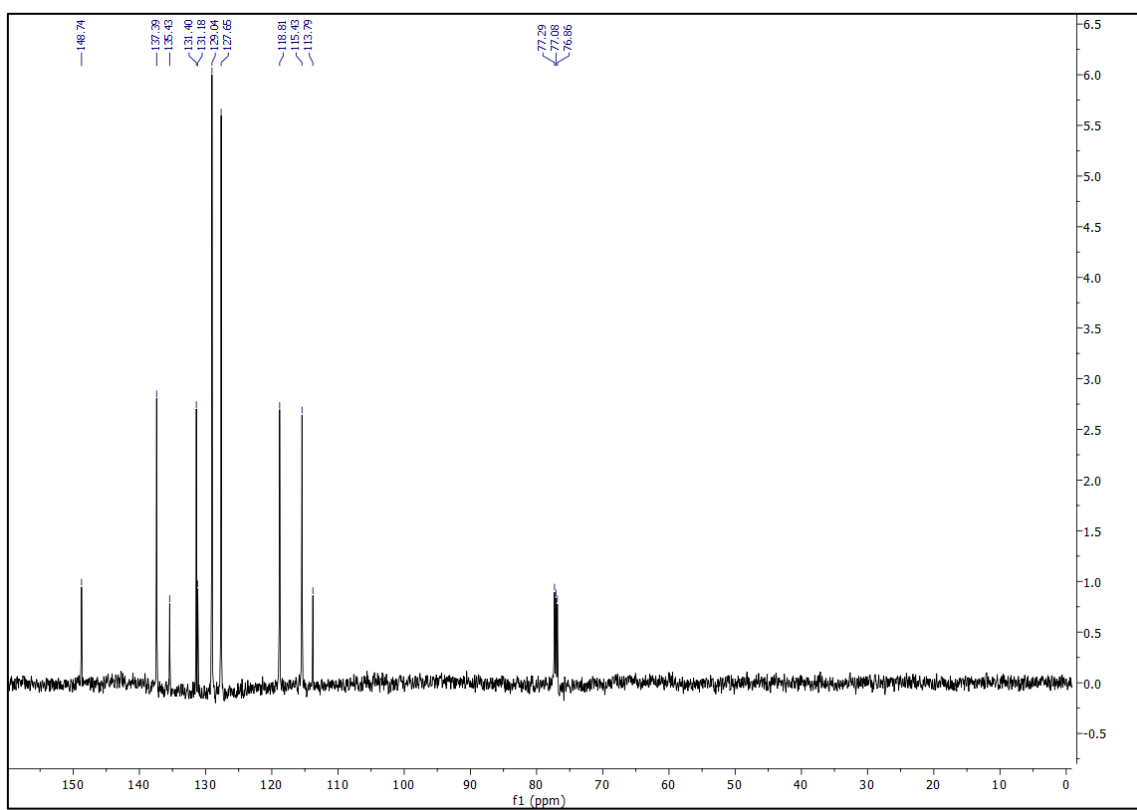

### $^1\text{H}$ NMR of (3f)

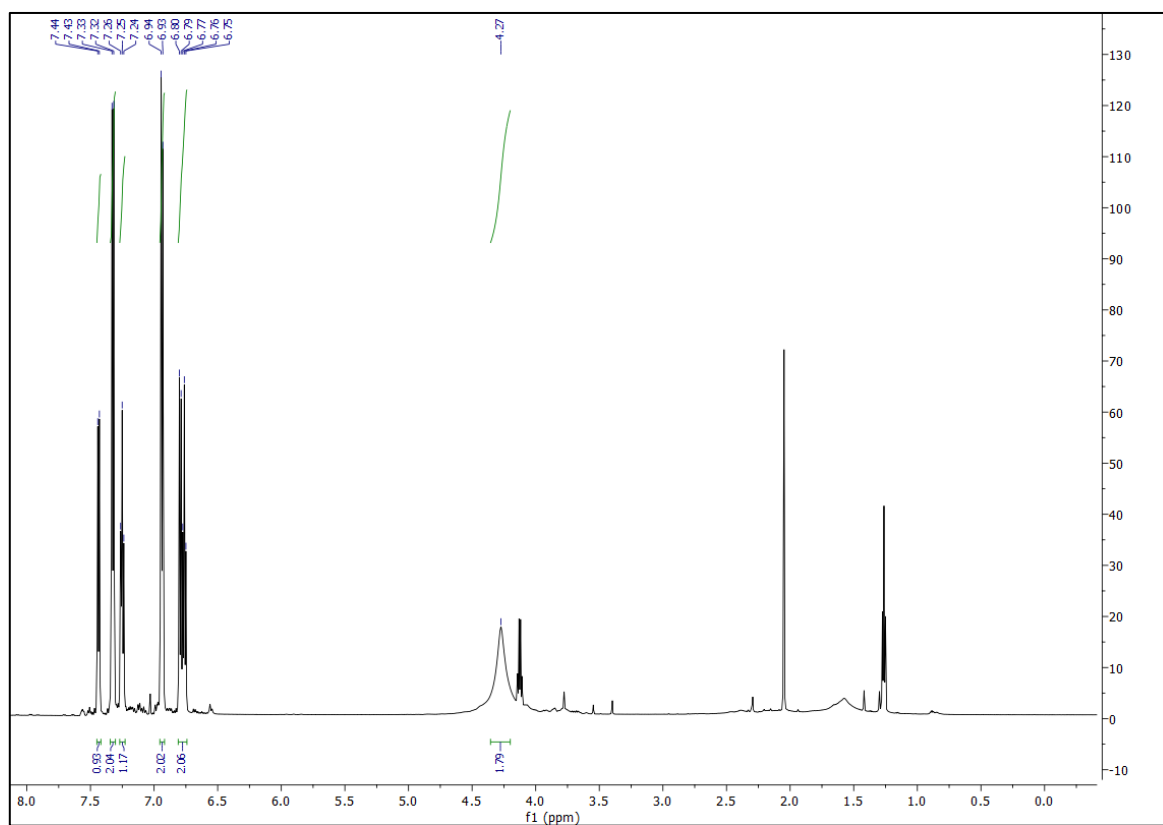

### $^{13}\text{C}$ NMR of (3f)

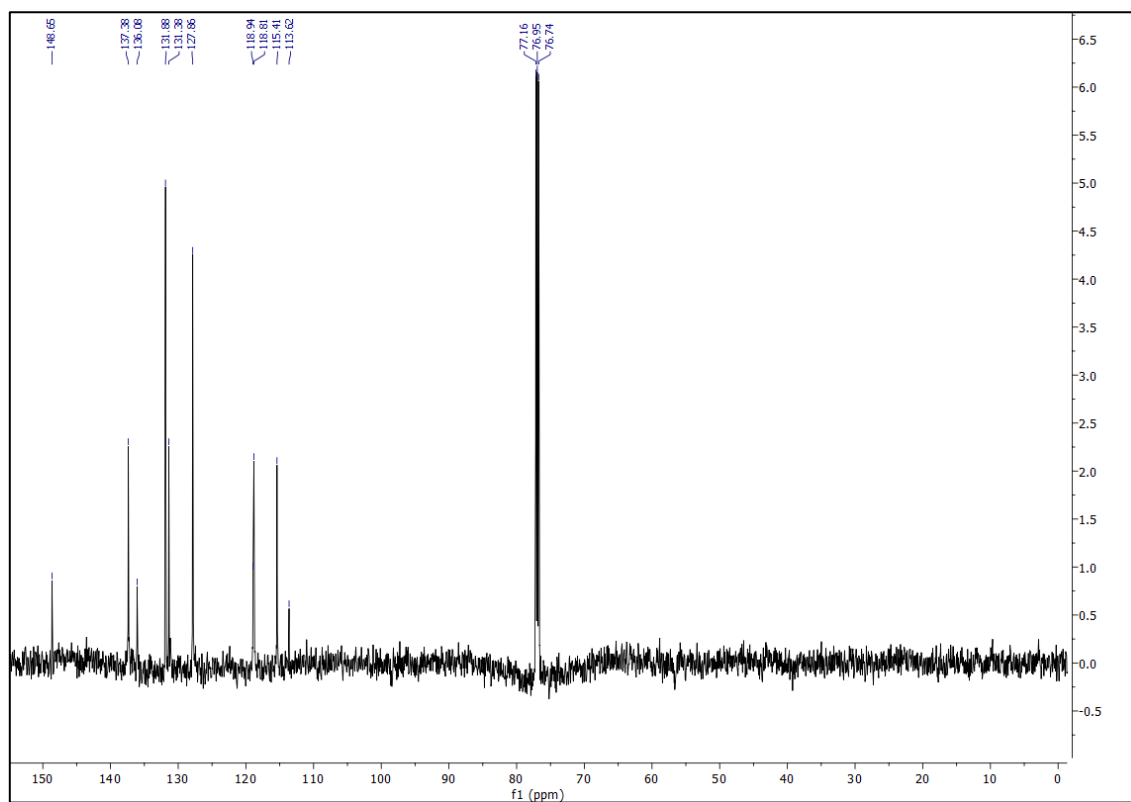



### <sup>1</sup>H NMR of (3g)

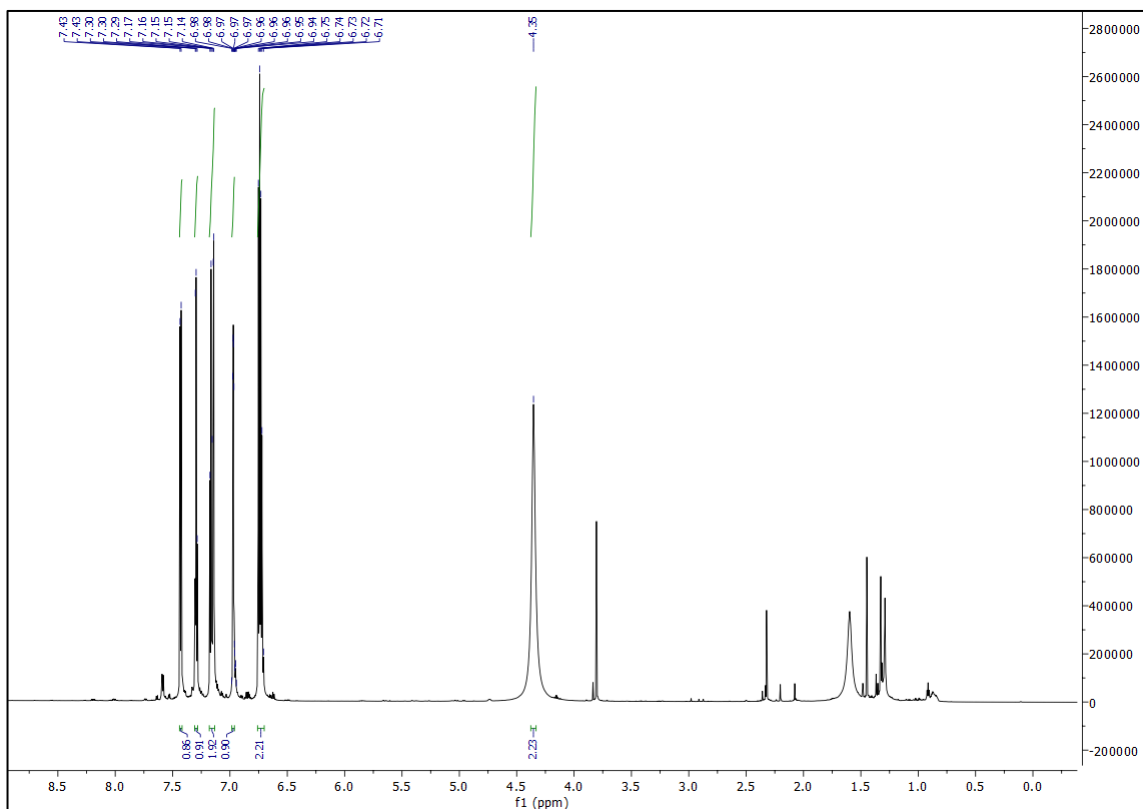

### <sup>13</sup>C NMR of (3g)

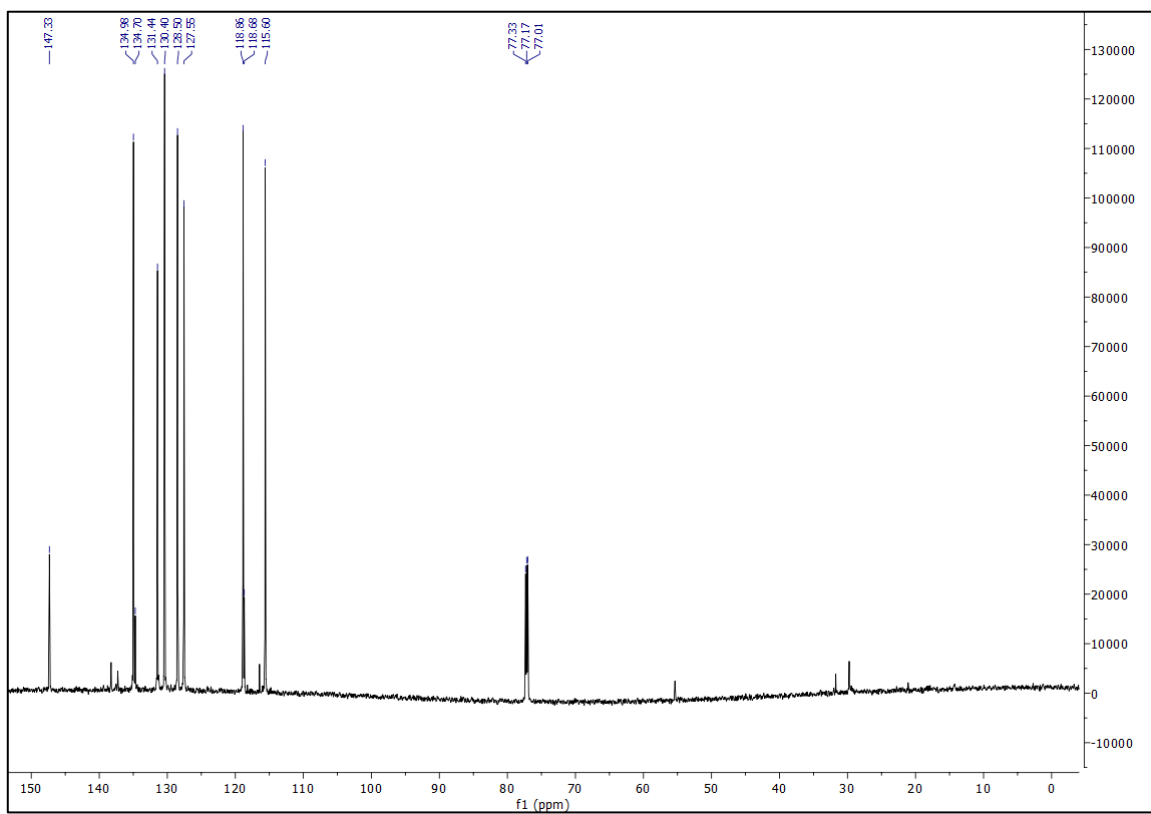

### $^1\text{H}$ NMR of (3h)

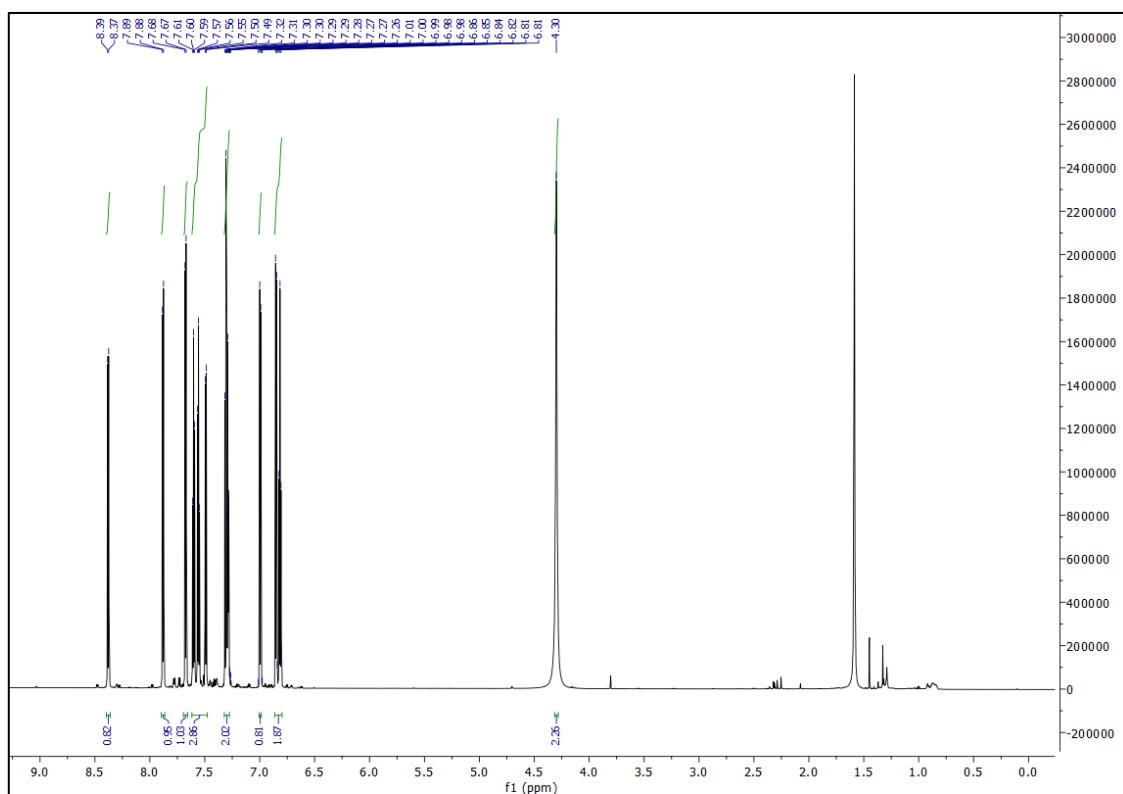

### $^{13}\text{C}$ NMR of (3h)

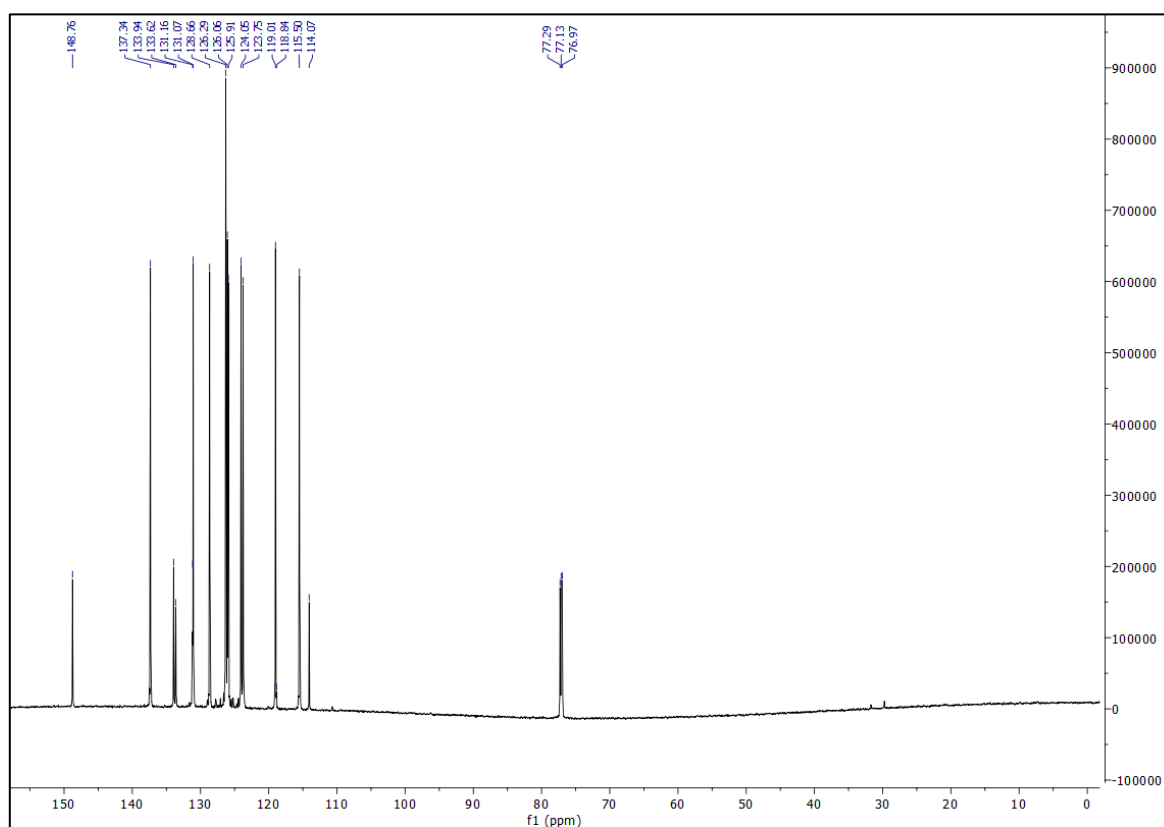

### $^1\text{H}$ NMR of (3i)

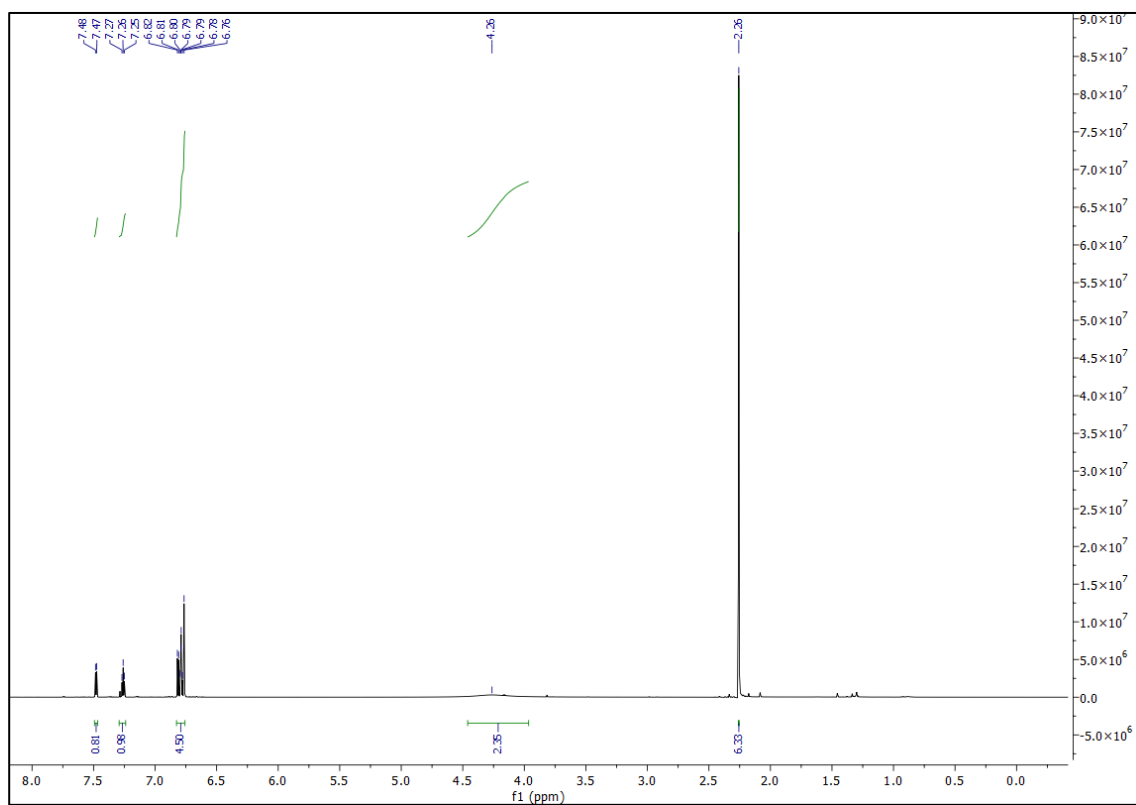

### $^{13}\text{C}$ NMR of (3i)

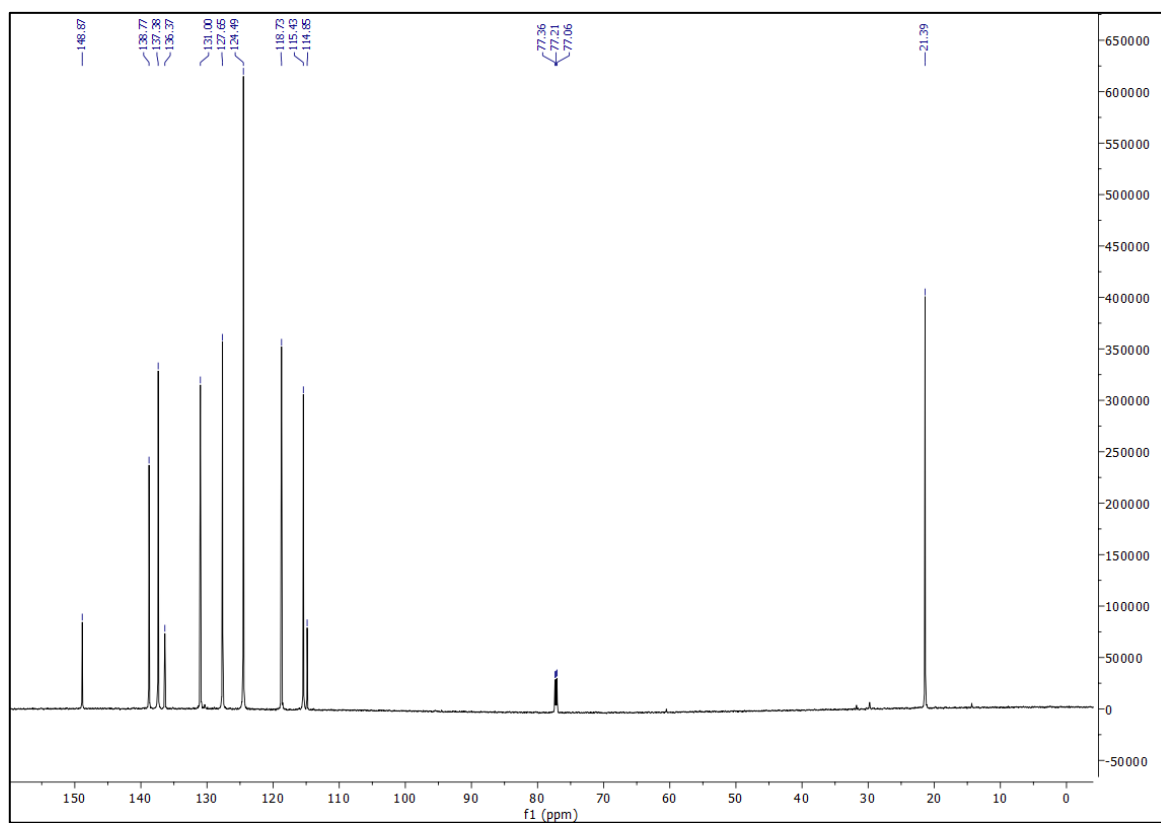

### <sup>1</sup>H NMR of (3j)

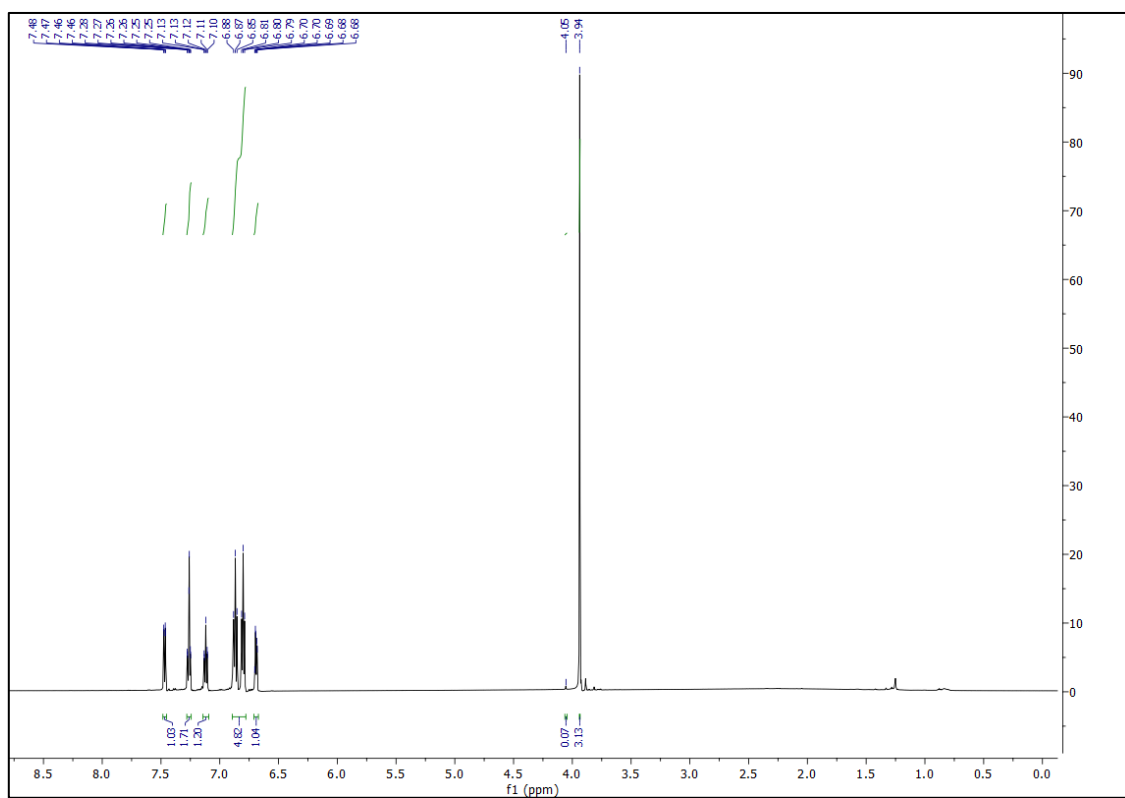

### <sup>13</sup>C NMR of (3j)

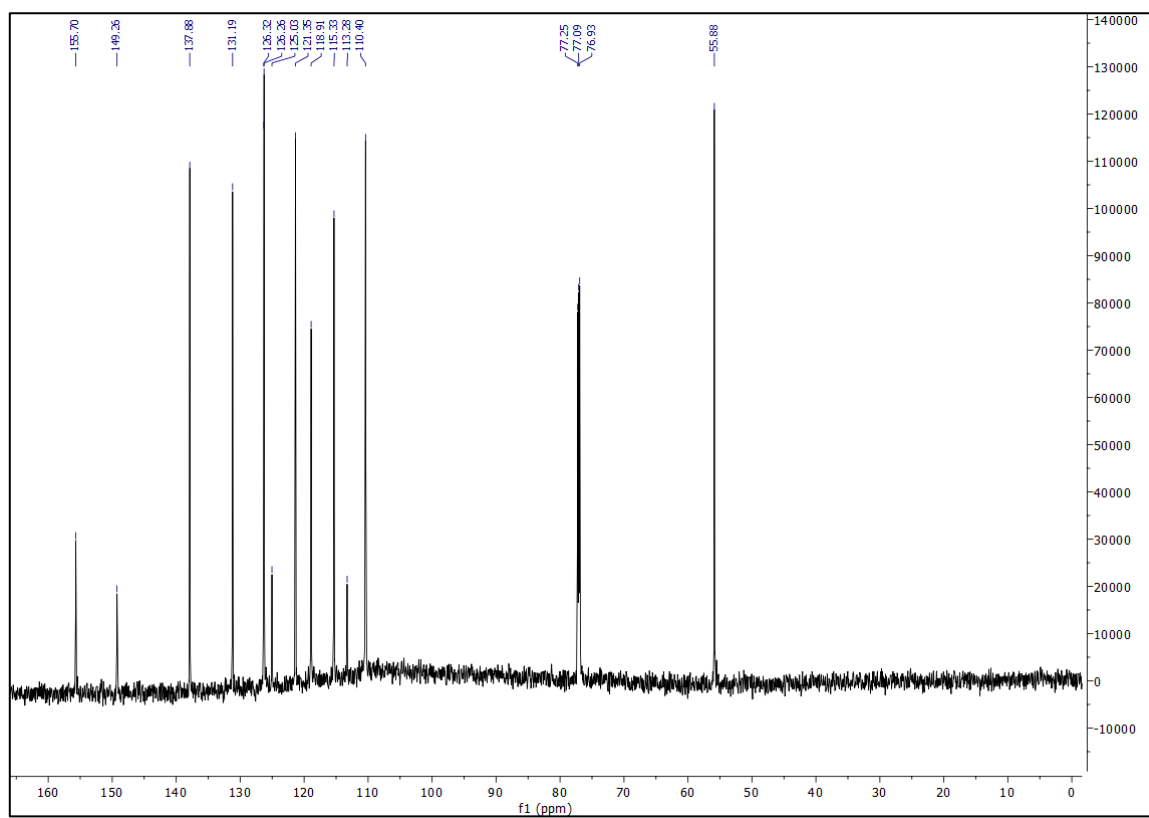

<sup>1</sup>H NMR of (4a)

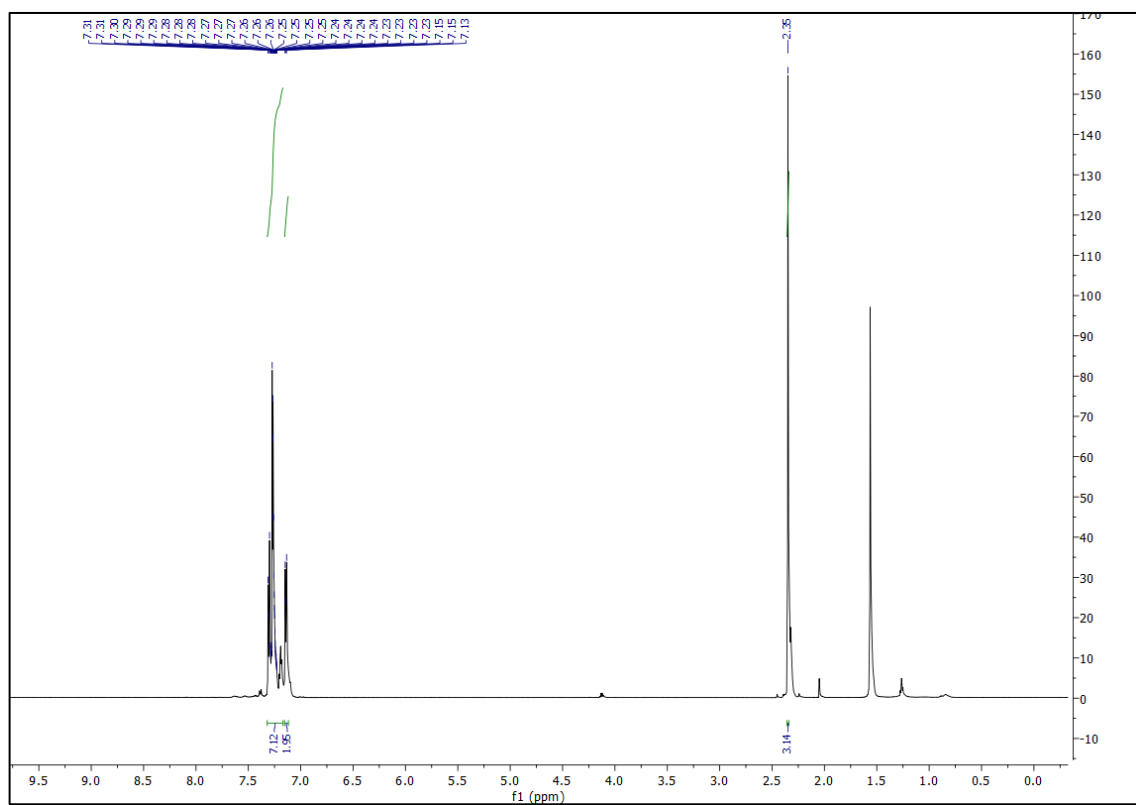

<sup>13</sup>C NMR of (4a)

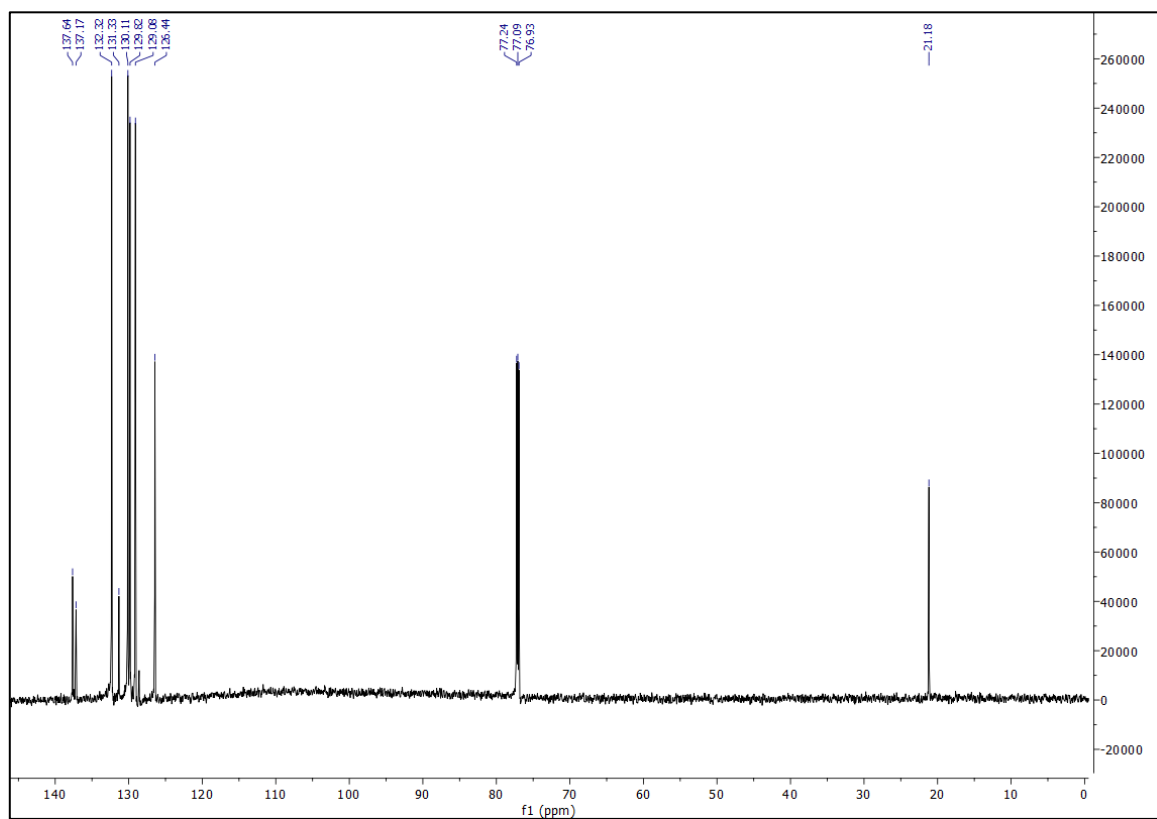

### $^1\text{H}$ NMR of (4b)

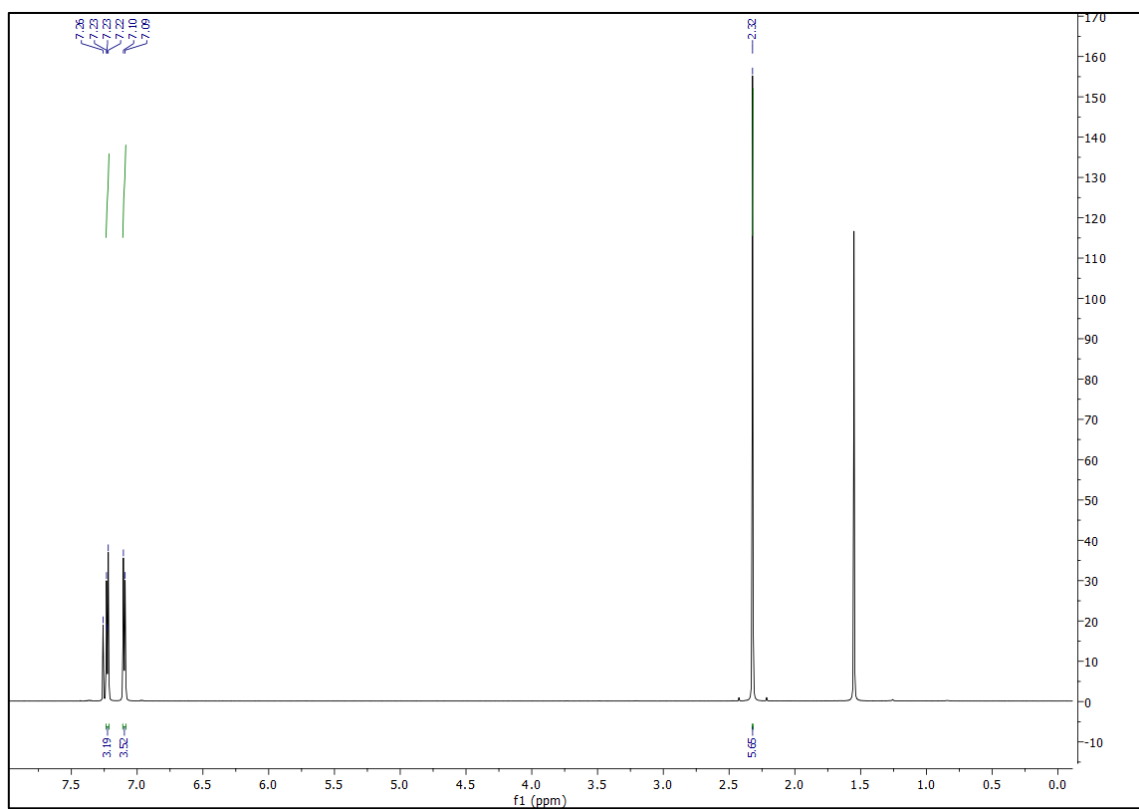

### $^{13}\text{C}$ NMR of (4b)

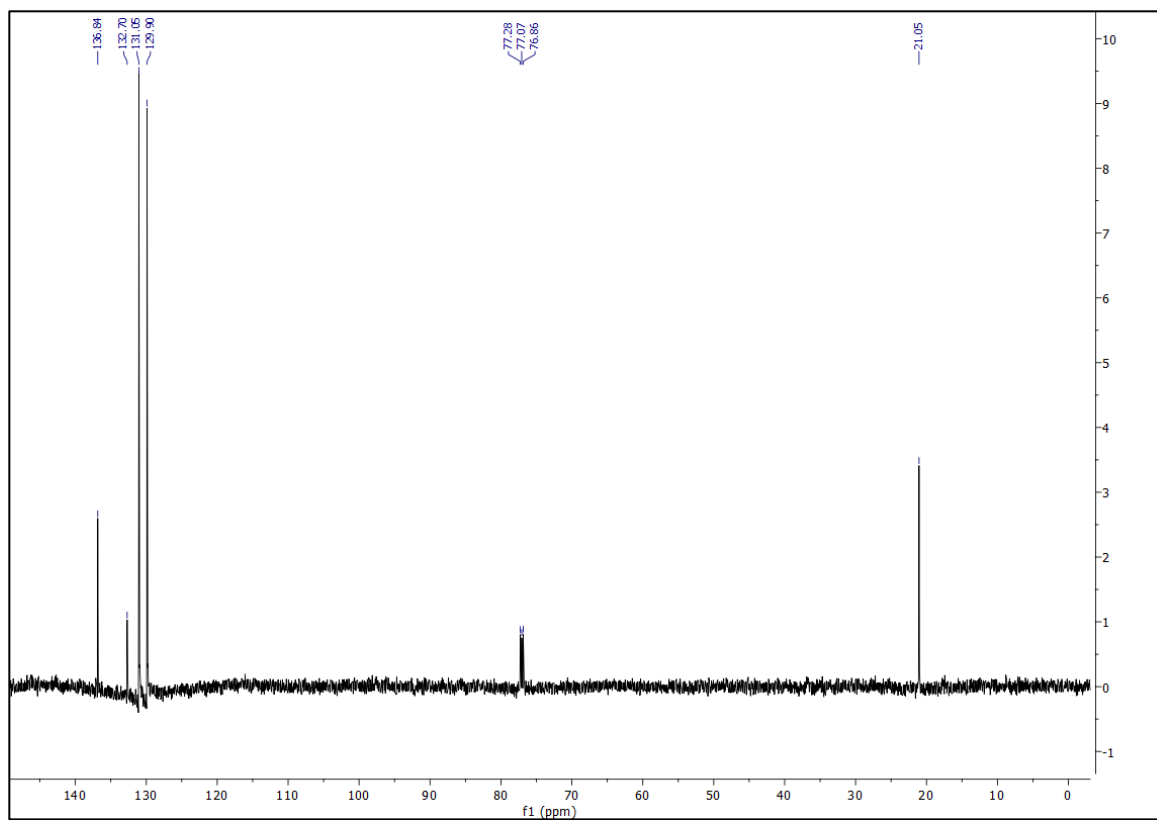

### $^1\text{H}$ NMR of (4c)

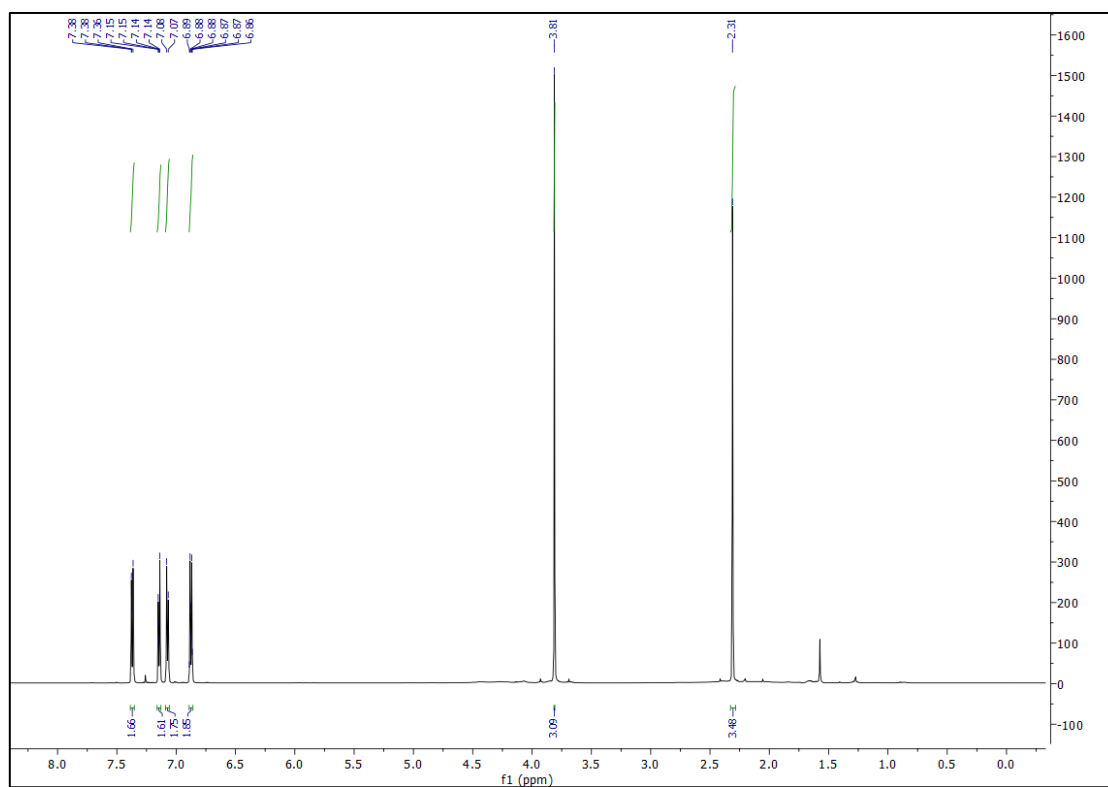

### $^{13}\text{C}$ NMR of (4c)

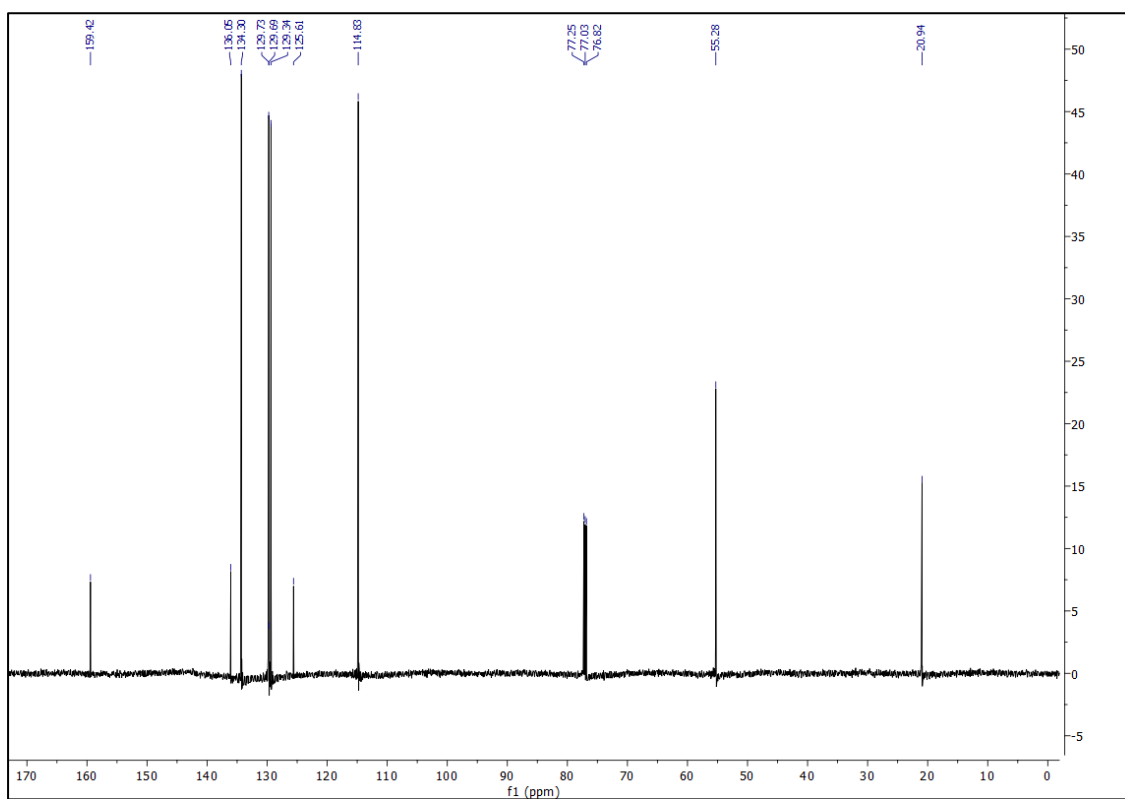

### $^1\text{H}$ NMR of (4d)

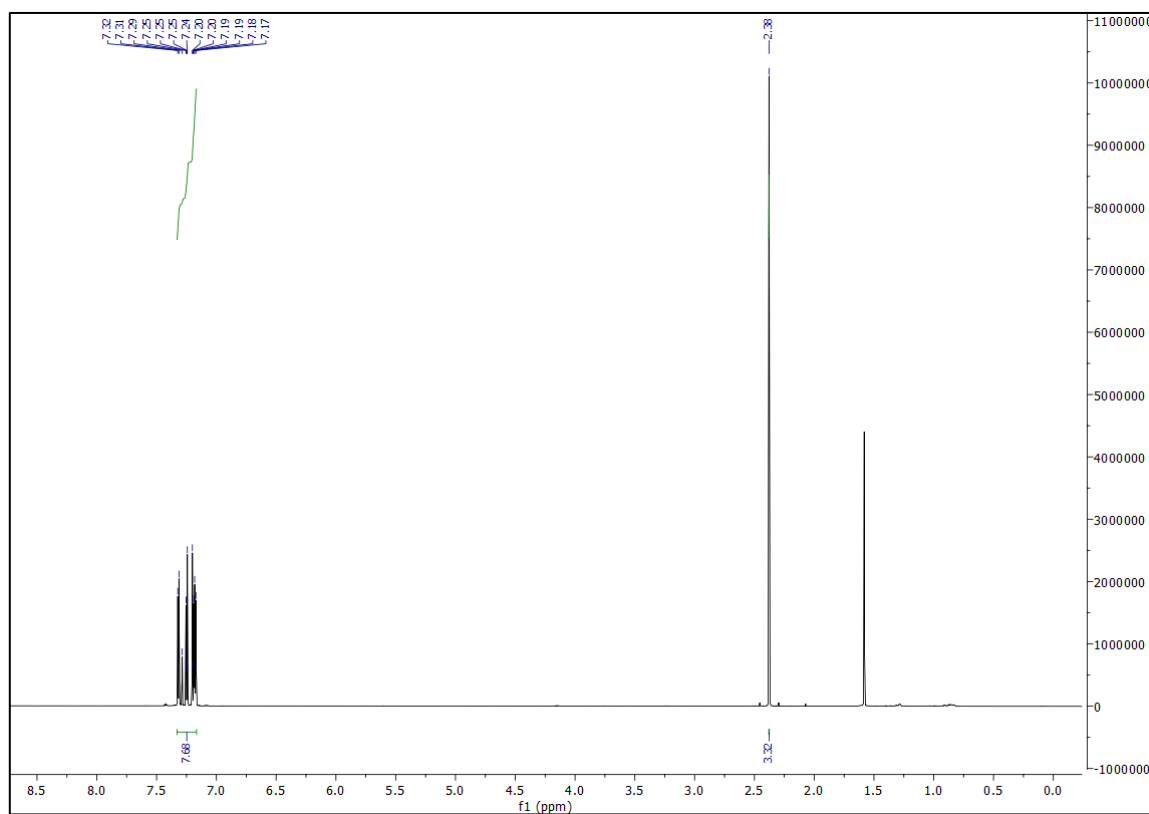

### $^{13}\text{C}$ NMR of (4d)

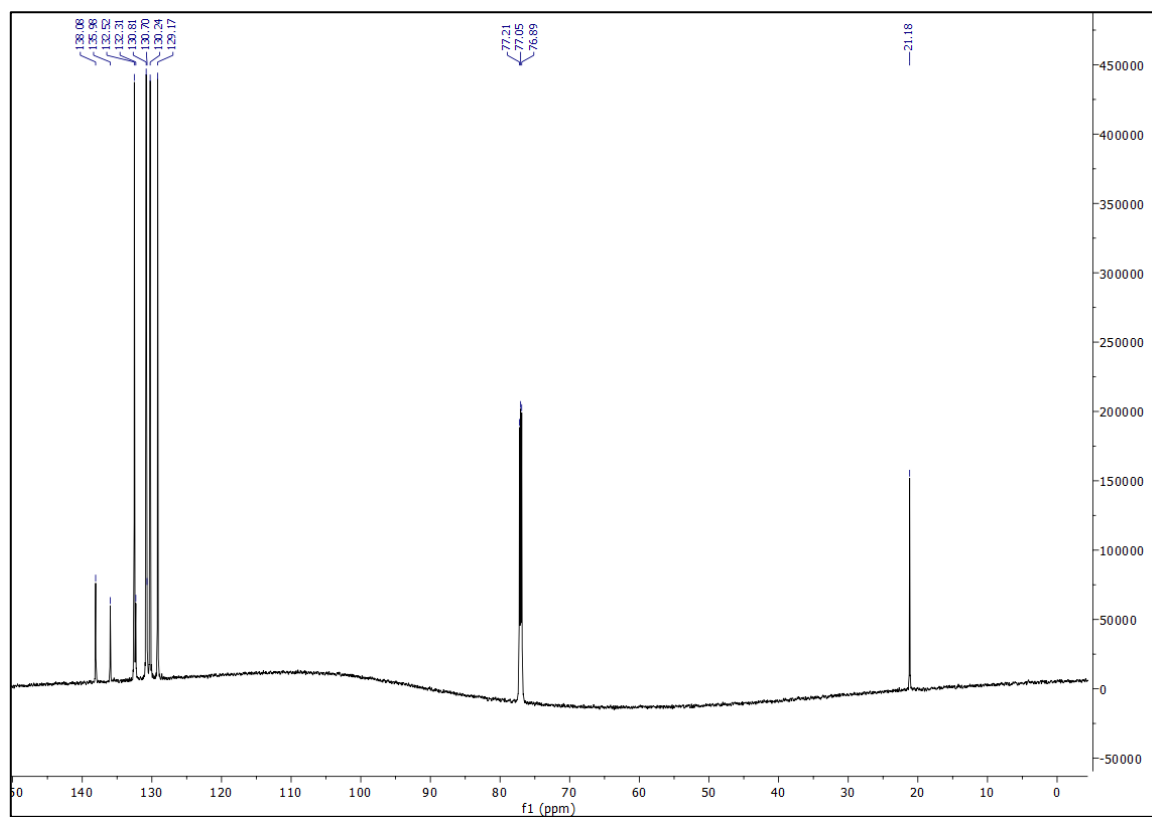



$^1\text{H}$  NMR of (4e)

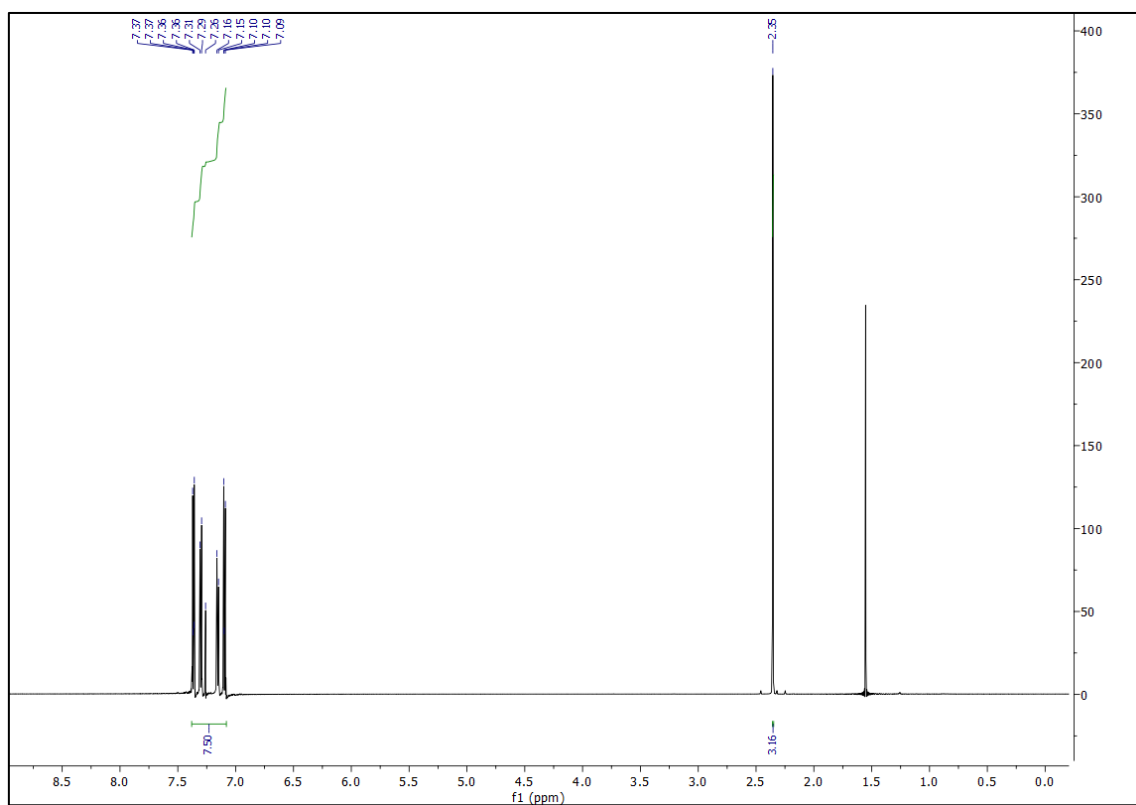

$^{13}\text{C}$  NMR of (4e)

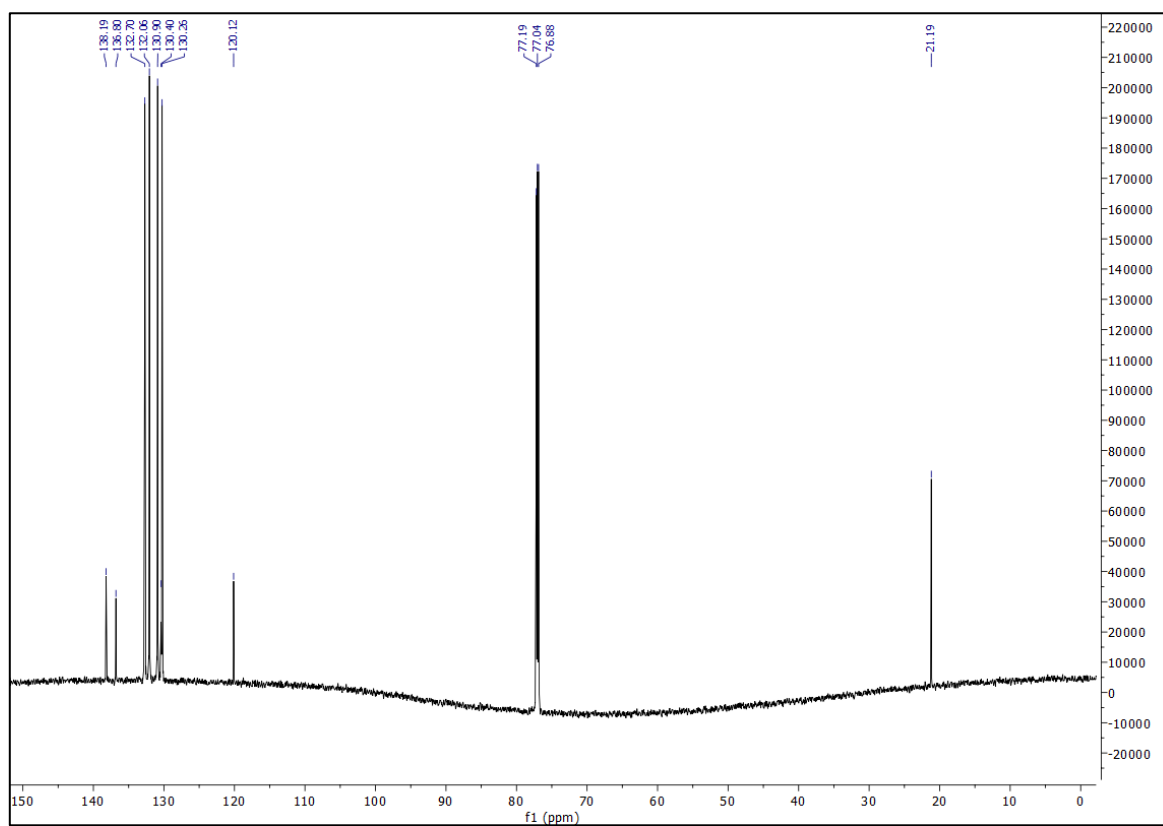

$^1\text{H}$  NMR of (**4f**)

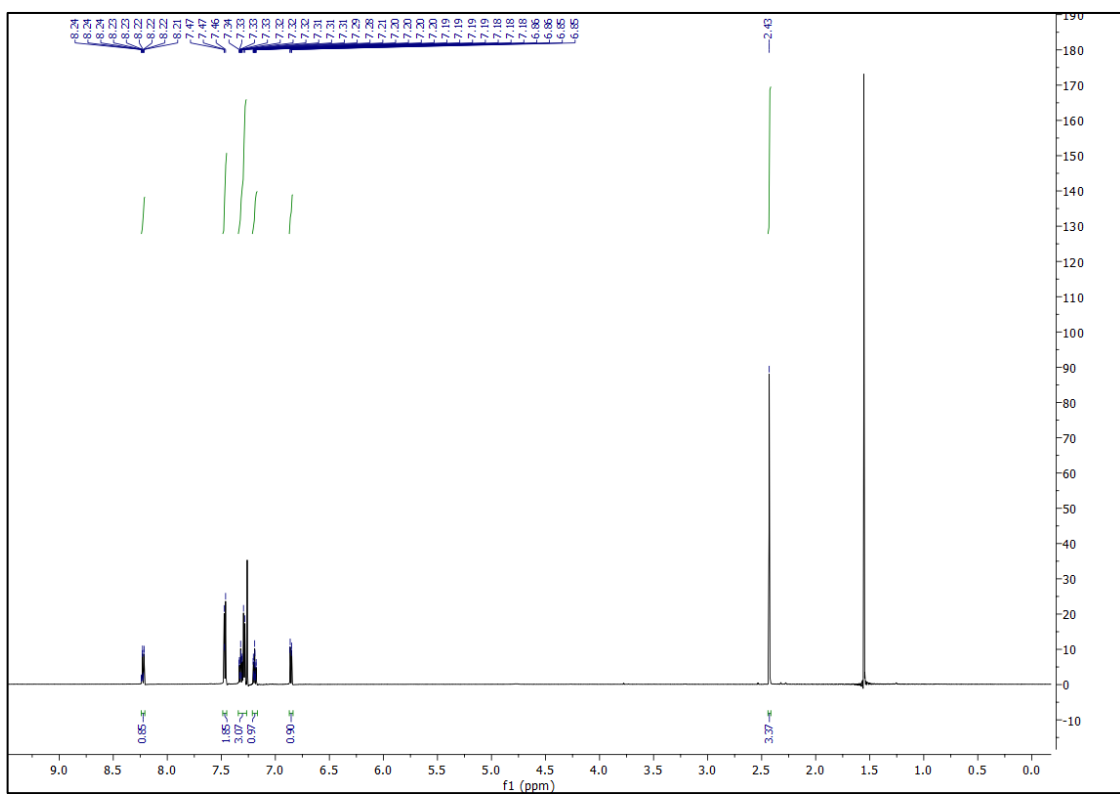

$^{13}\text{C}$  NMR of (**4f**)

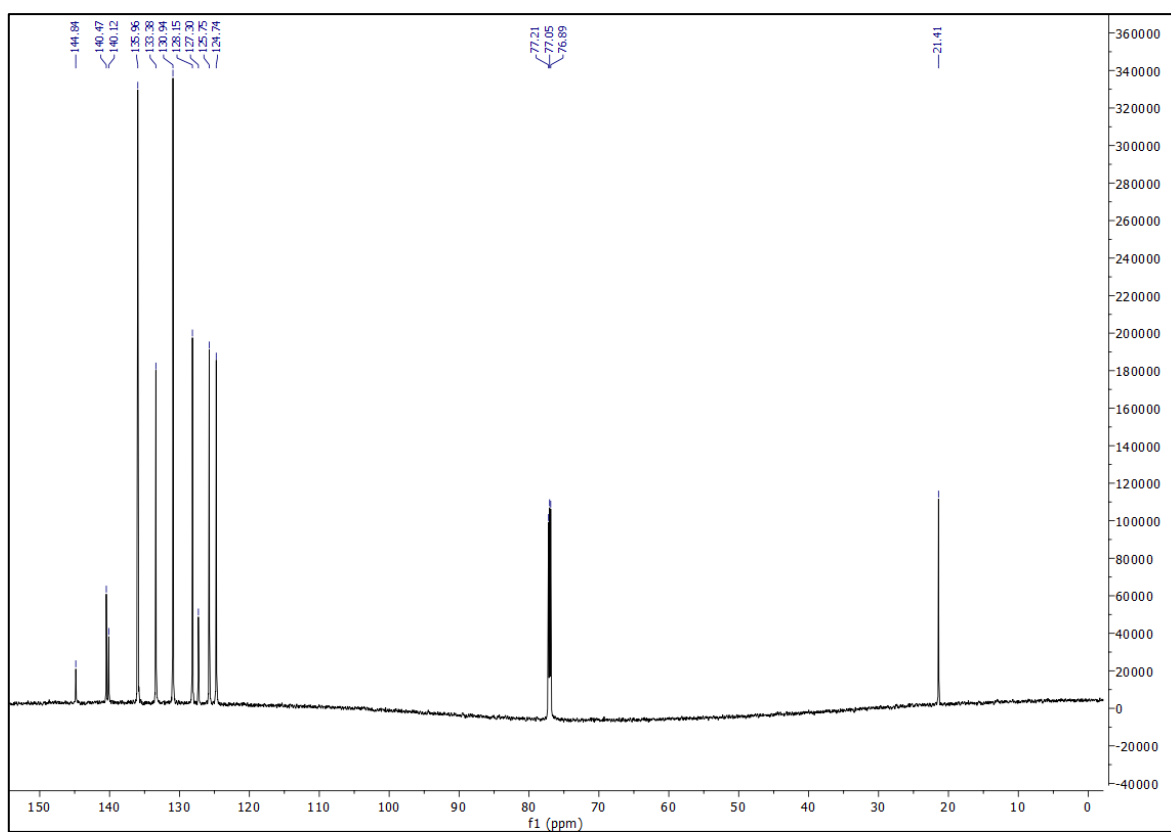

### $^1\text{H}$ NMR of (4g)

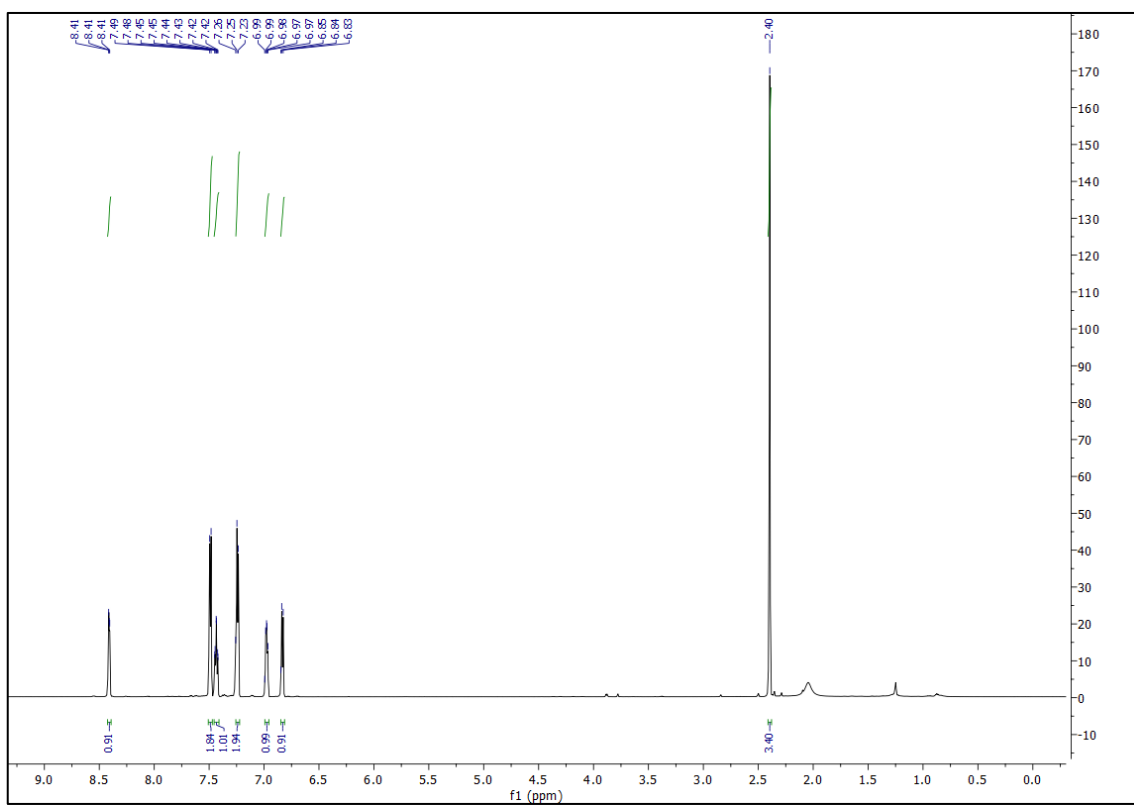

### $^{13}\text{C}$ NMR of (4g)

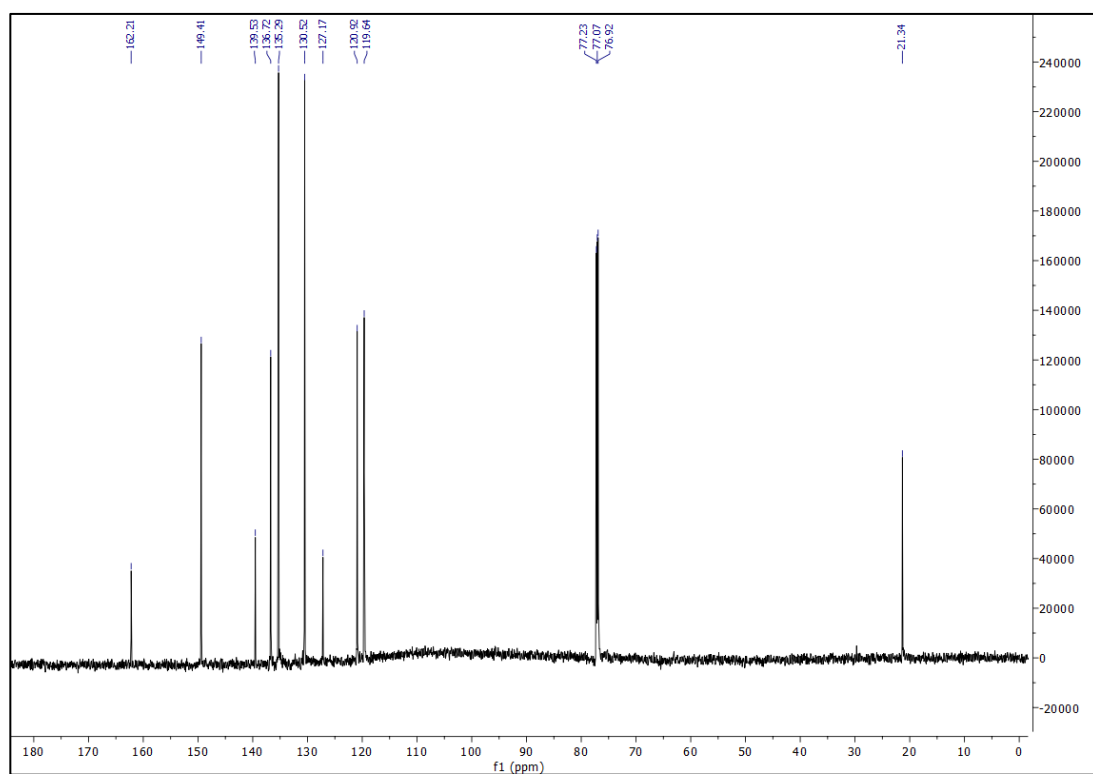

$^1\text{H}$  NMR of (**4h**)

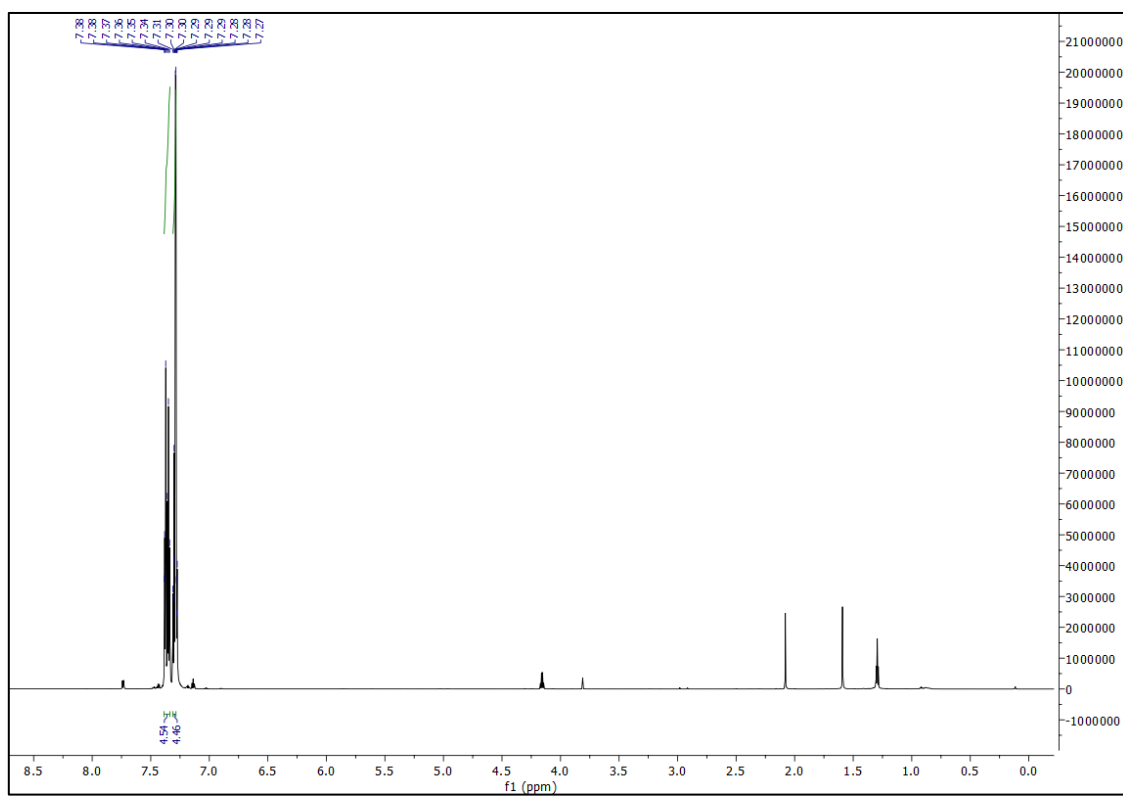

$^{13}\text{C}$  NMR of (**4h**)

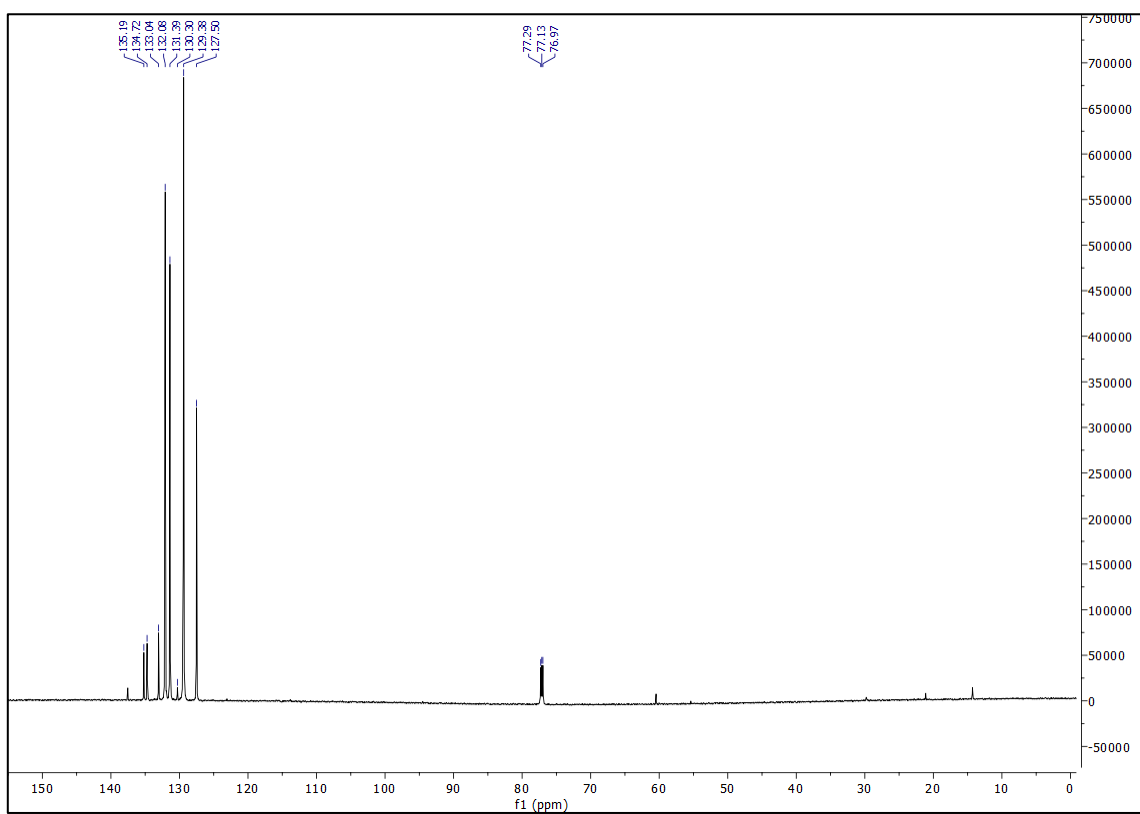

$^1\text{H}$  NMR of (4i)

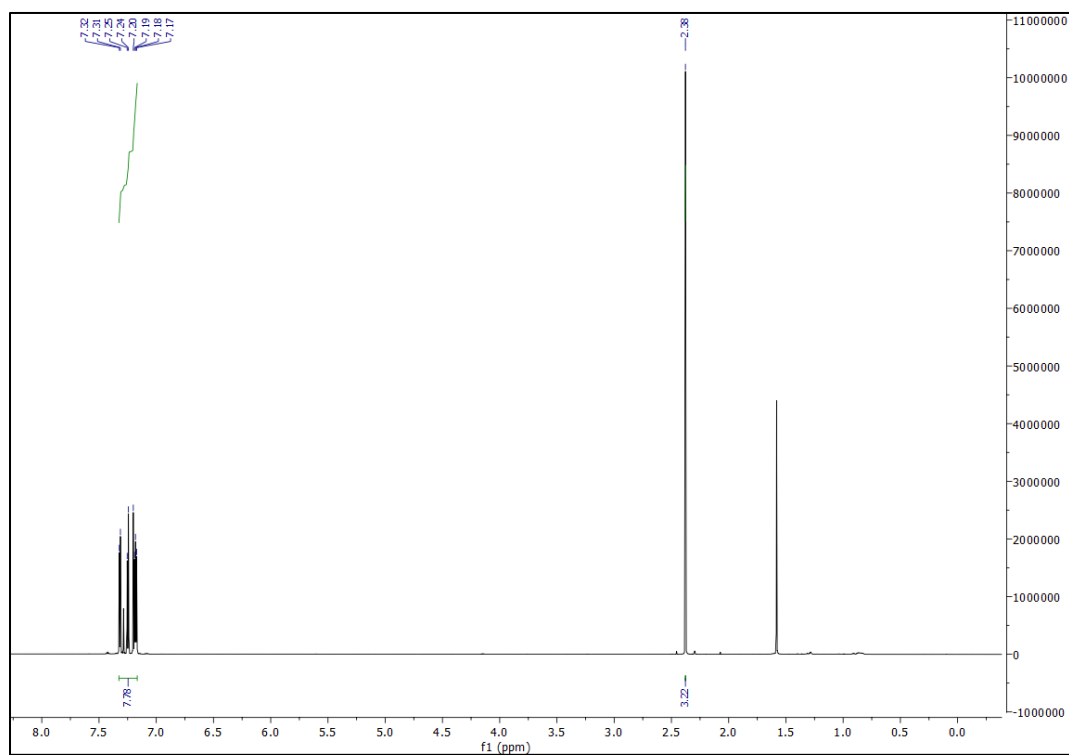

$^{13}\text{C}$  NMR of (4i)

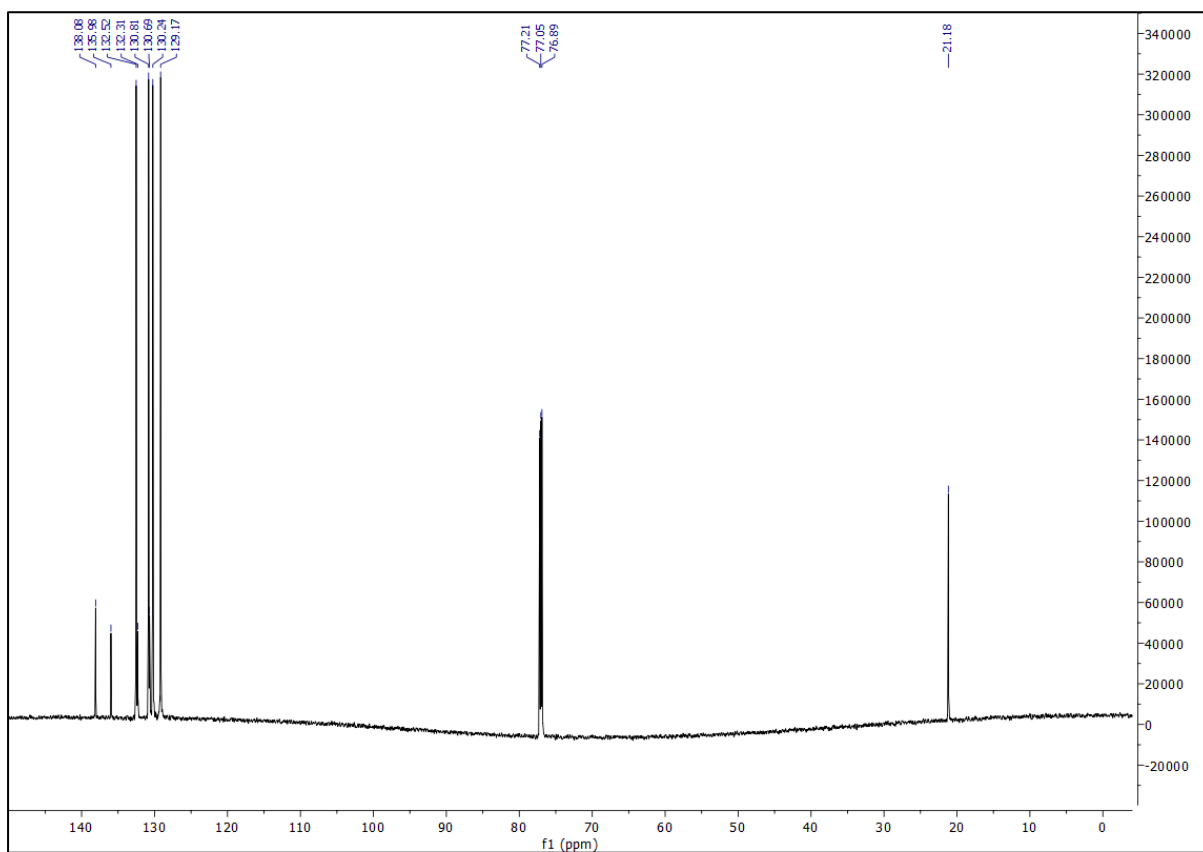

### $^1\text{H}$ NMR of (4j)

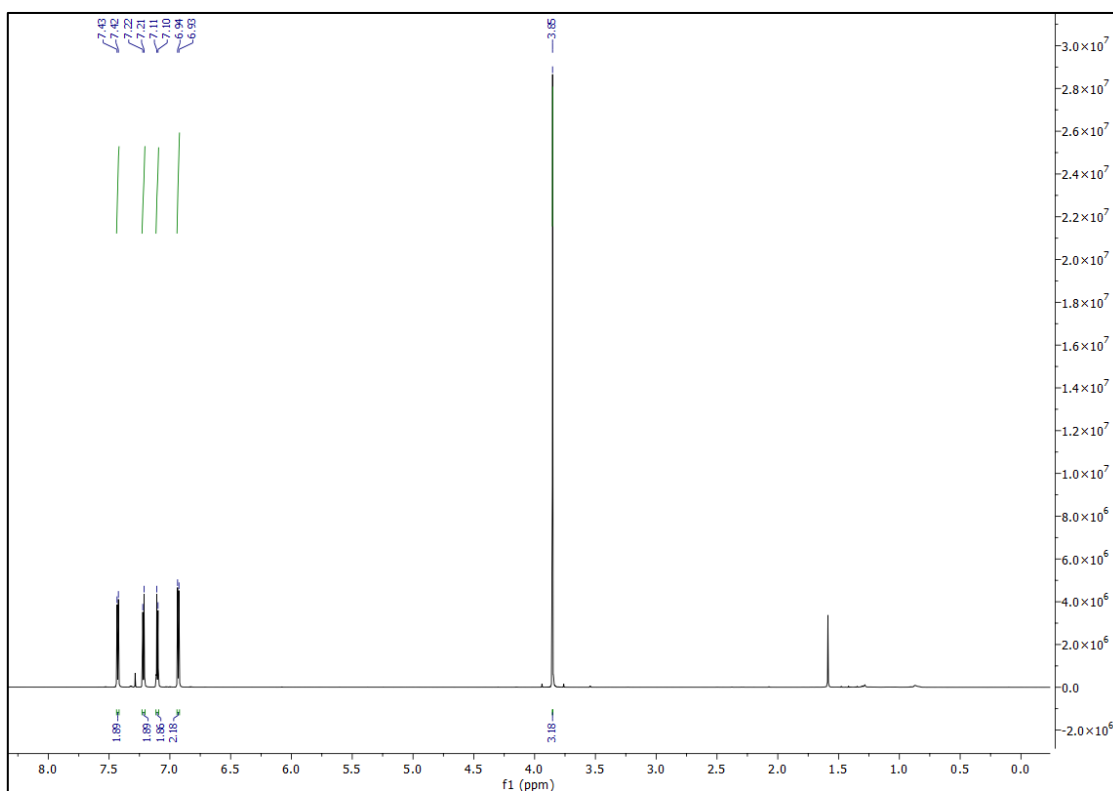

### $^{13}\text{C}$ NMR of (4j)

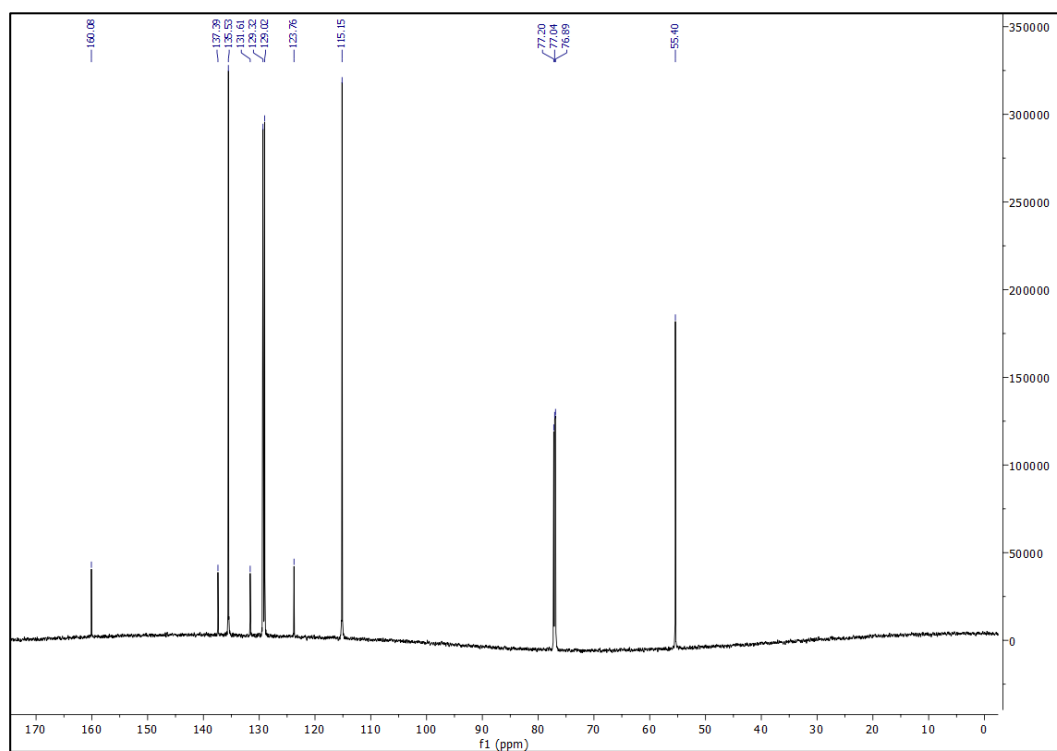

$^1\text{H}$  NMR of (**4k**)

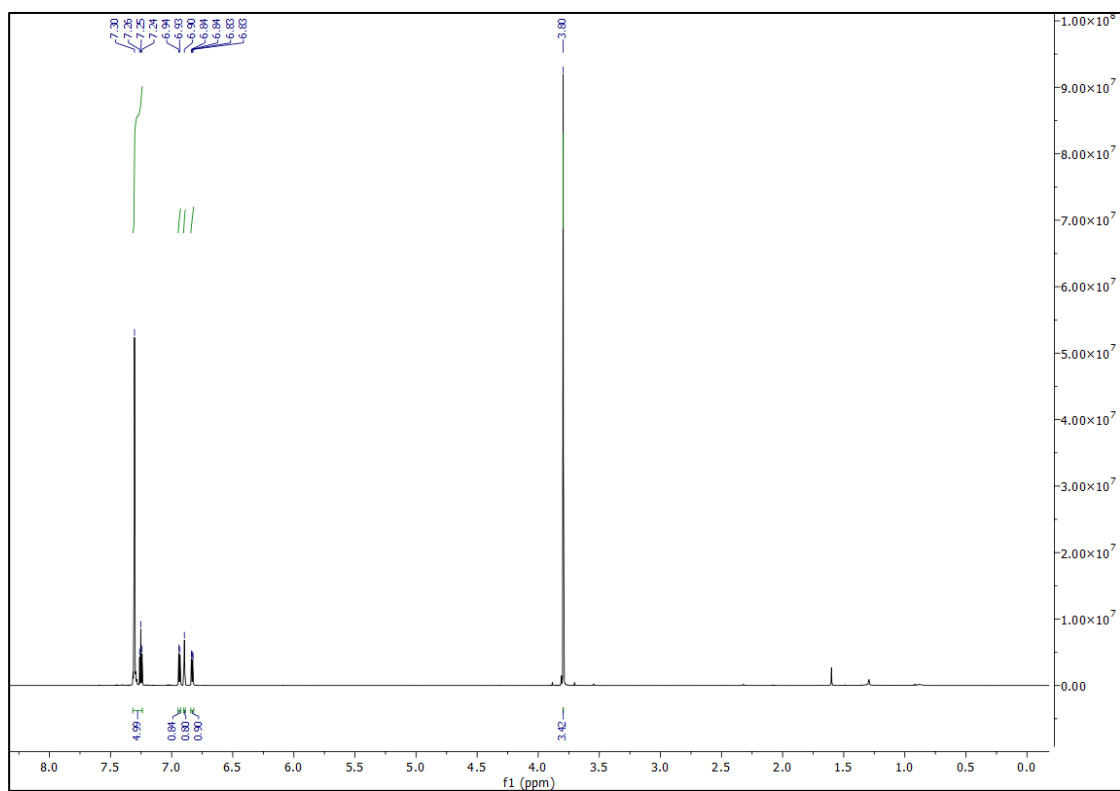

$^{13}\text{C}$  NMR of (**4k**)

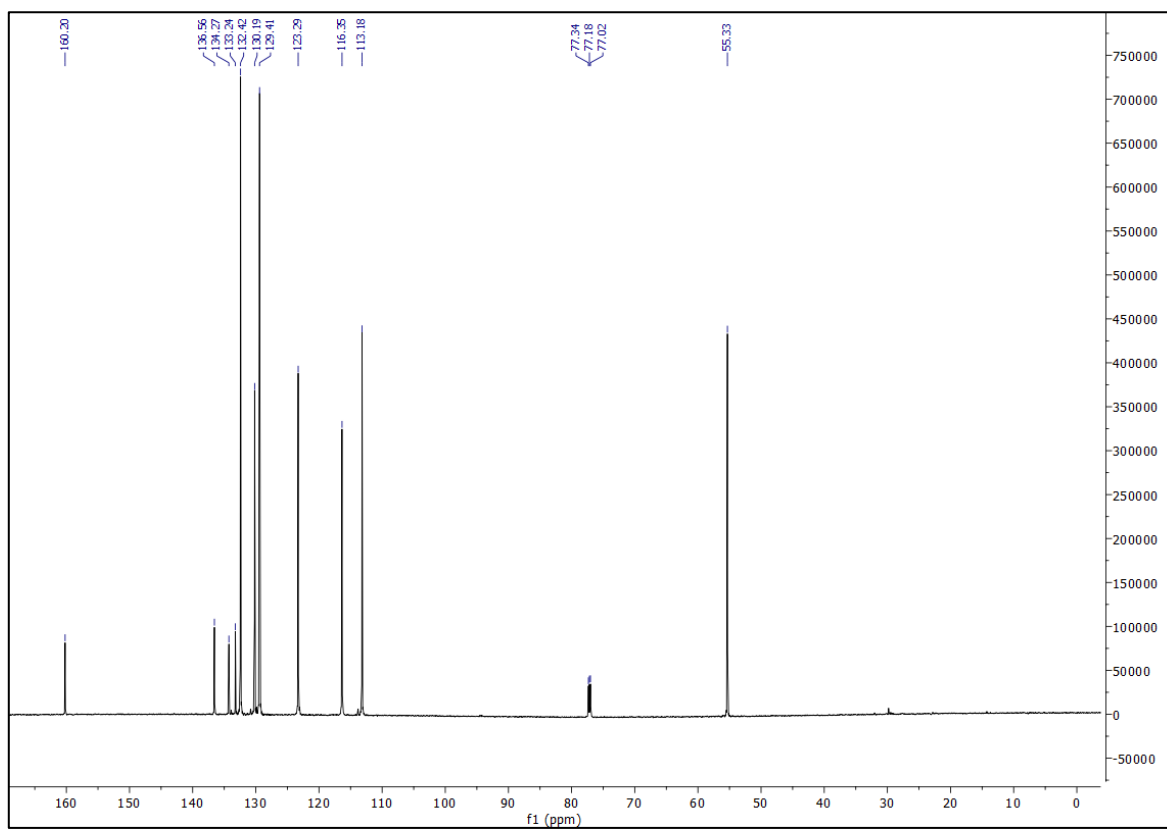

$^1\text{H}$  NMR of (4I)

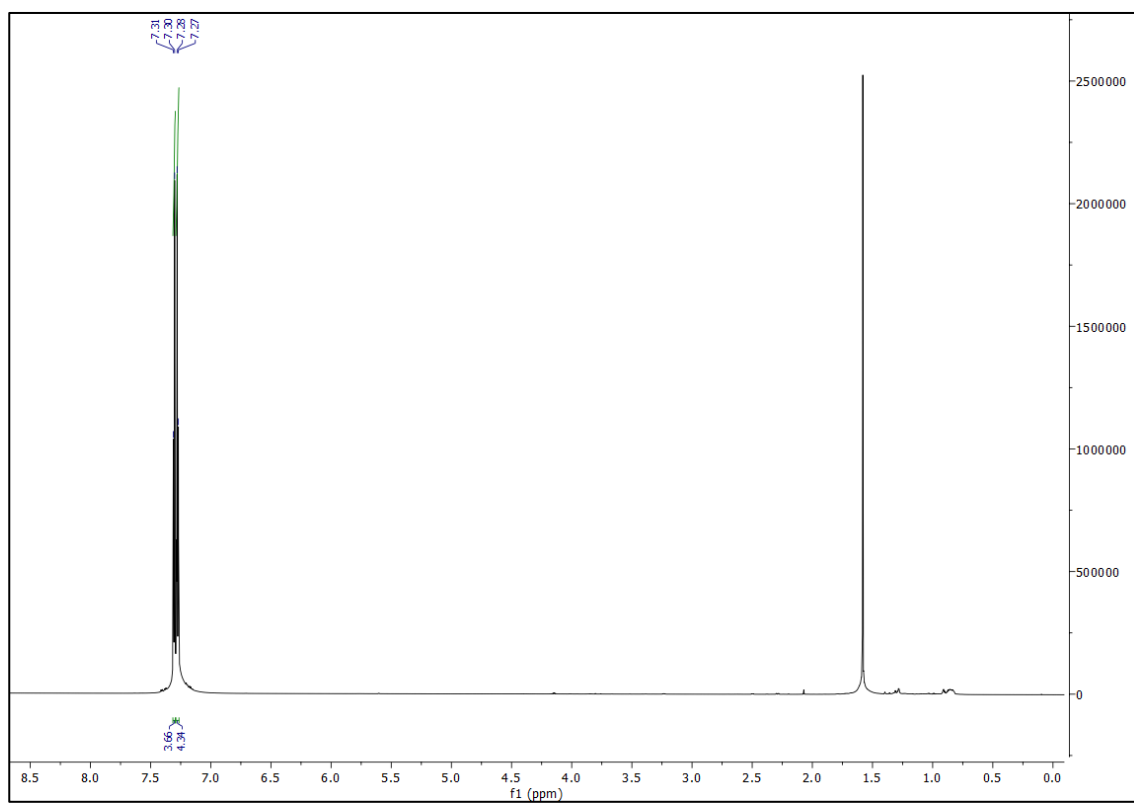

$^{13}\text{C}$  NMR of (4I)

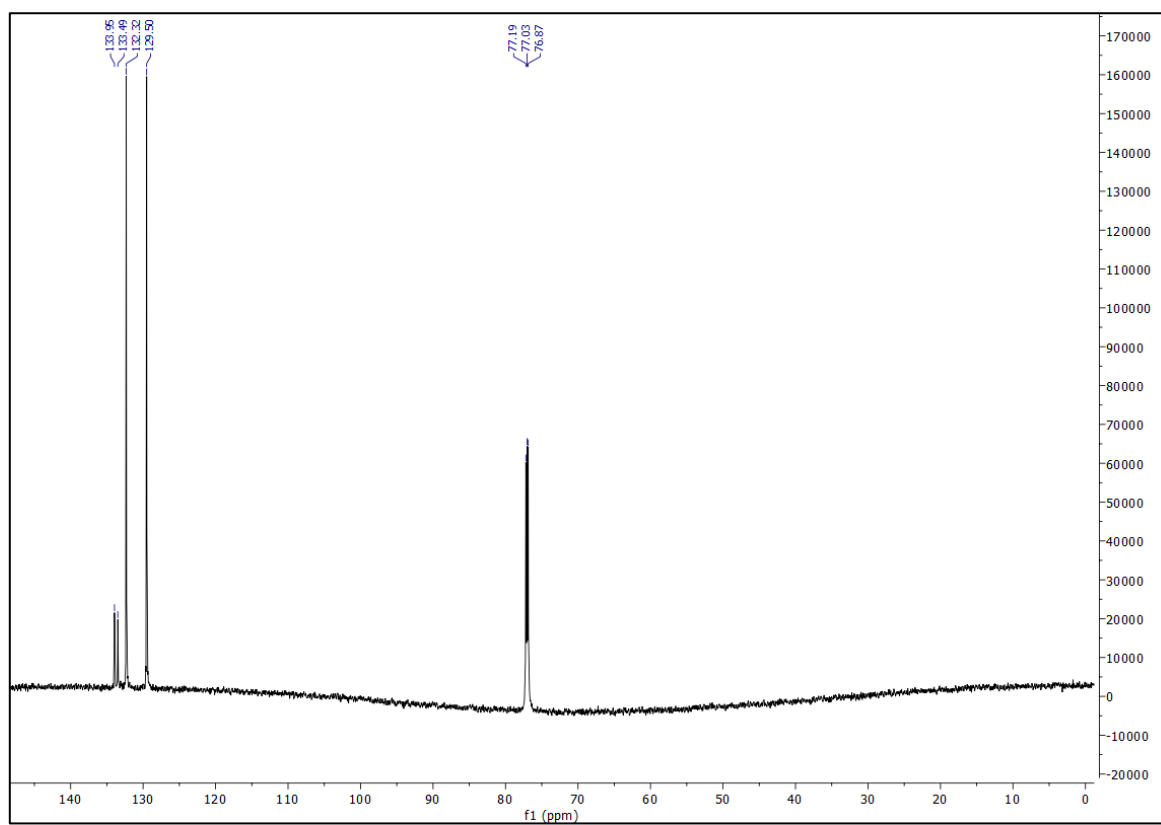



### $^1\text{H}$ NMR of (4m)

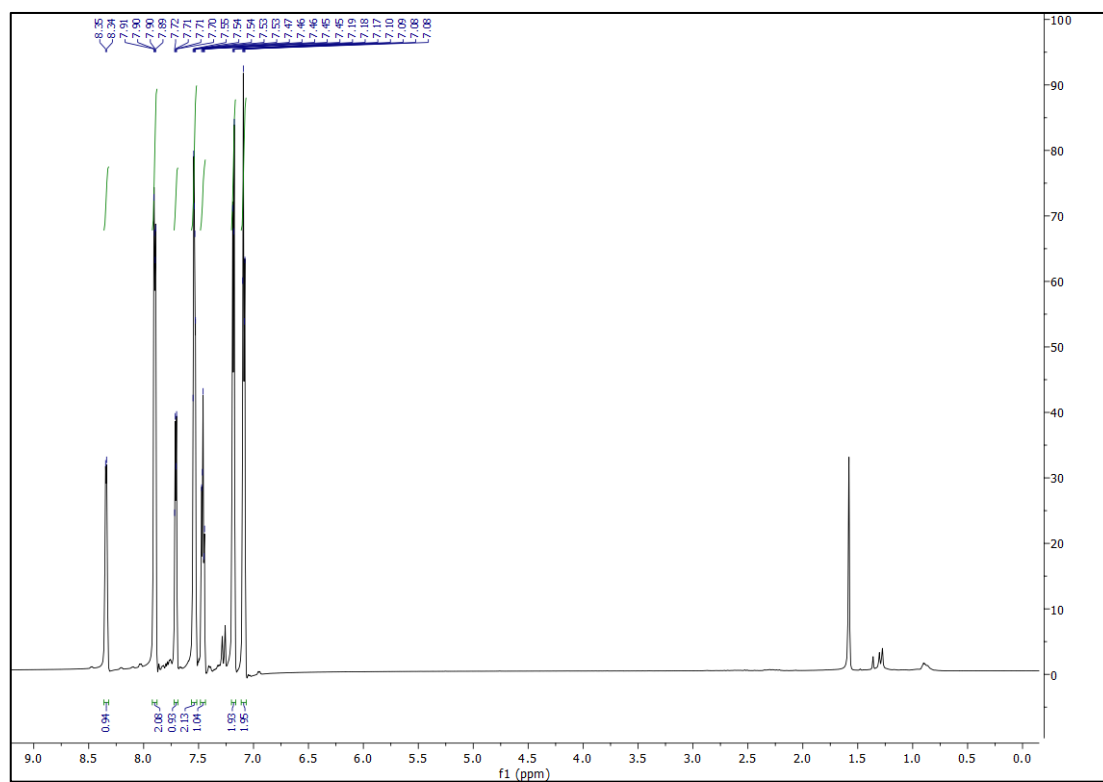

### $^{13}\text{C}$ NMR of (4m)

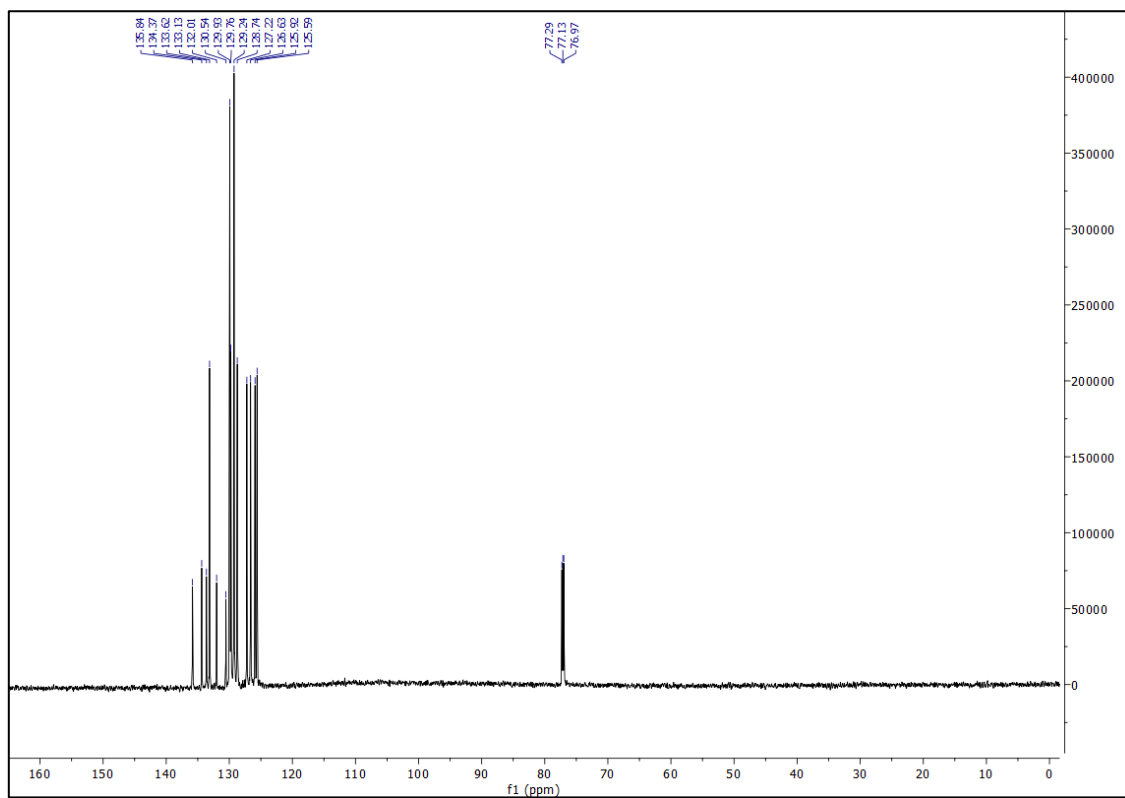

### $^1\text{H}$ NMR of (4n)

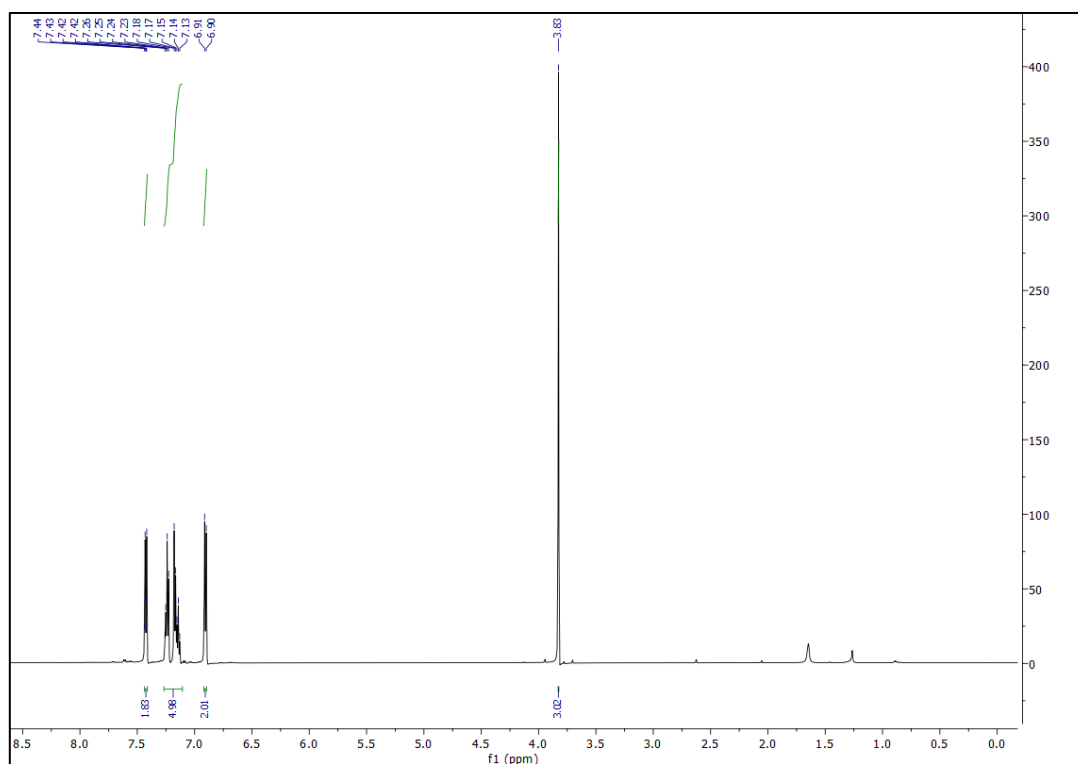

### $^{13}\text{C}$ NMR of (4n)

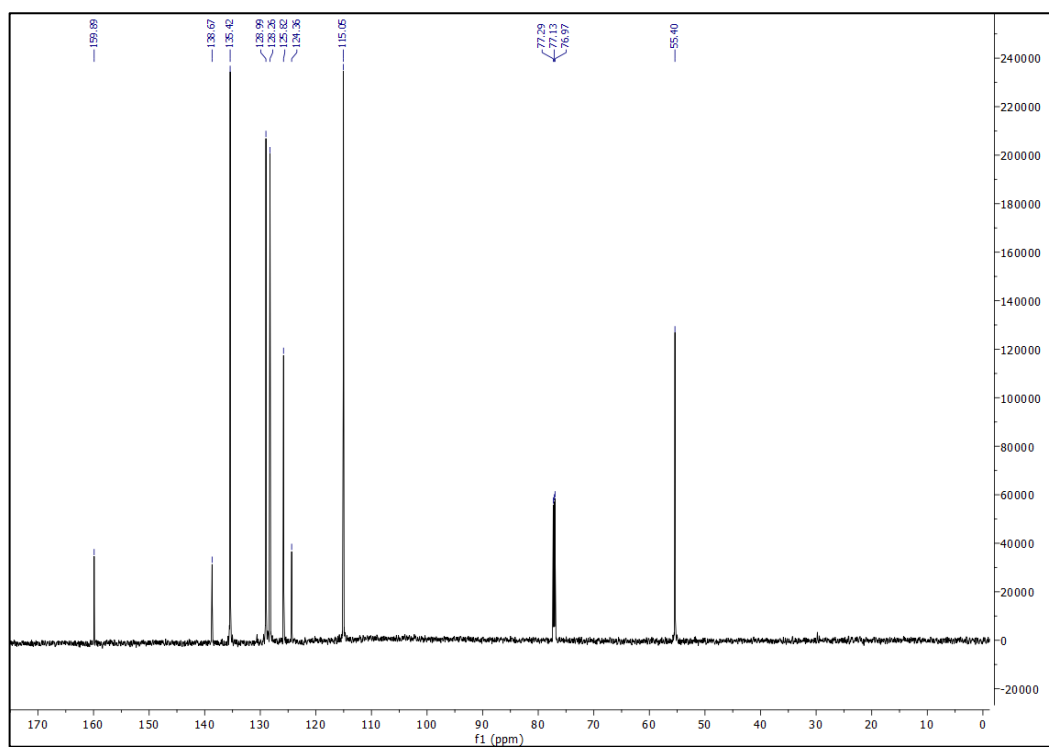

### $^1\text{H}$ NMR of (4o)

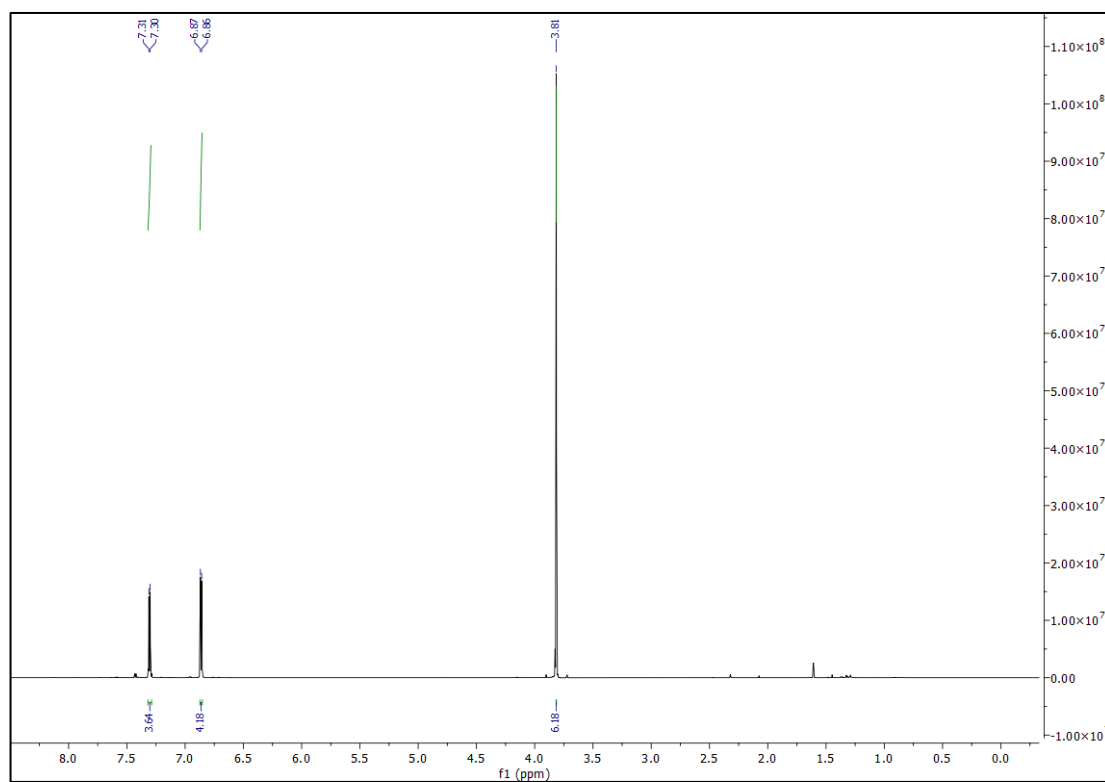

### $^{13}\text{C}$ NMR of (4o)

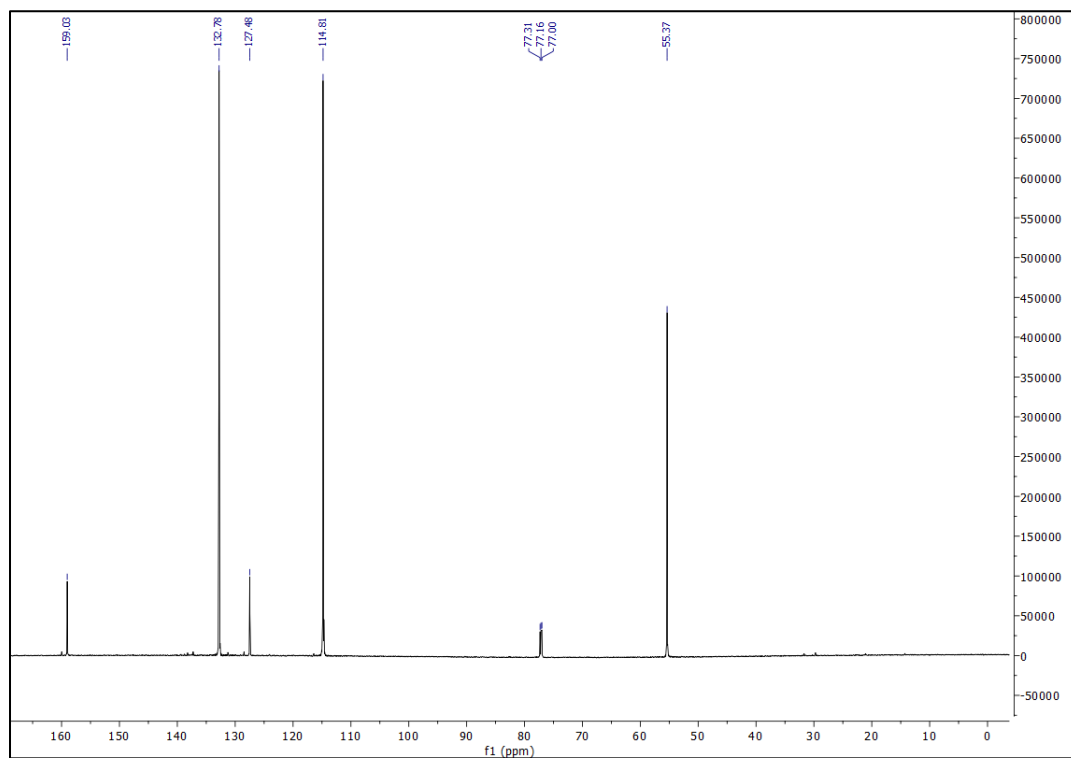

### $^1\text{H}$ NMR of (4p)

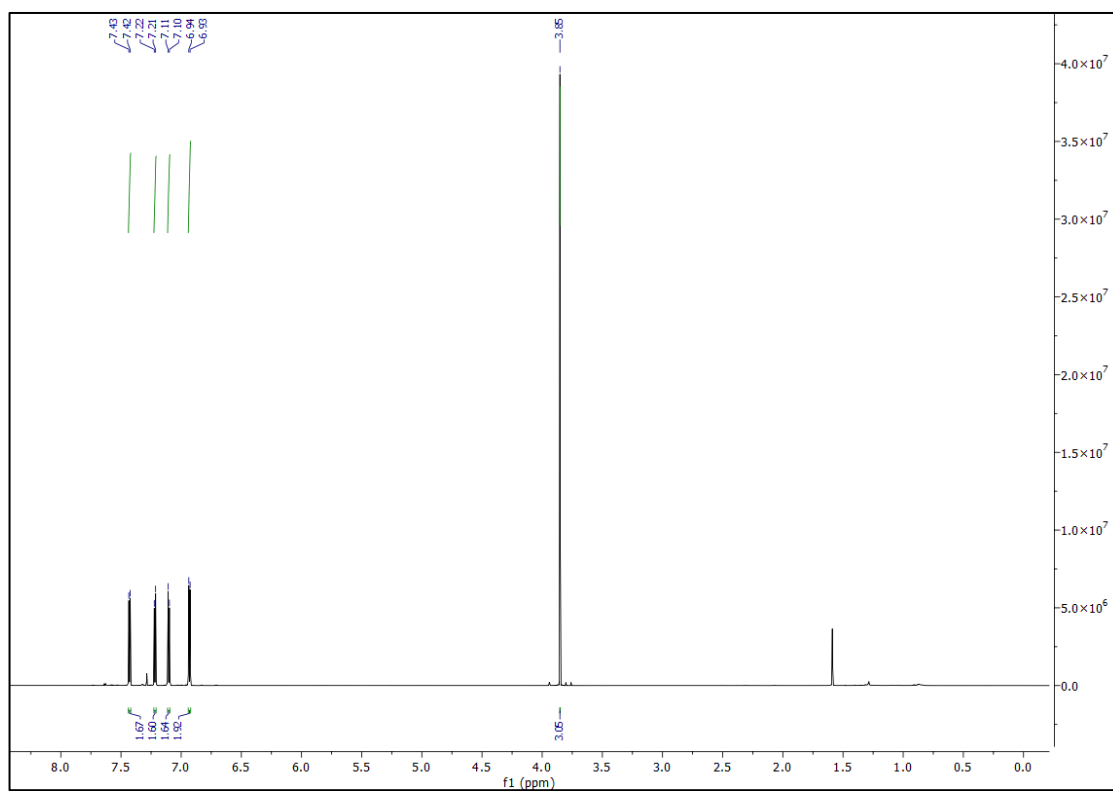

### $^{13}\text{C}$ NMR of (4p)

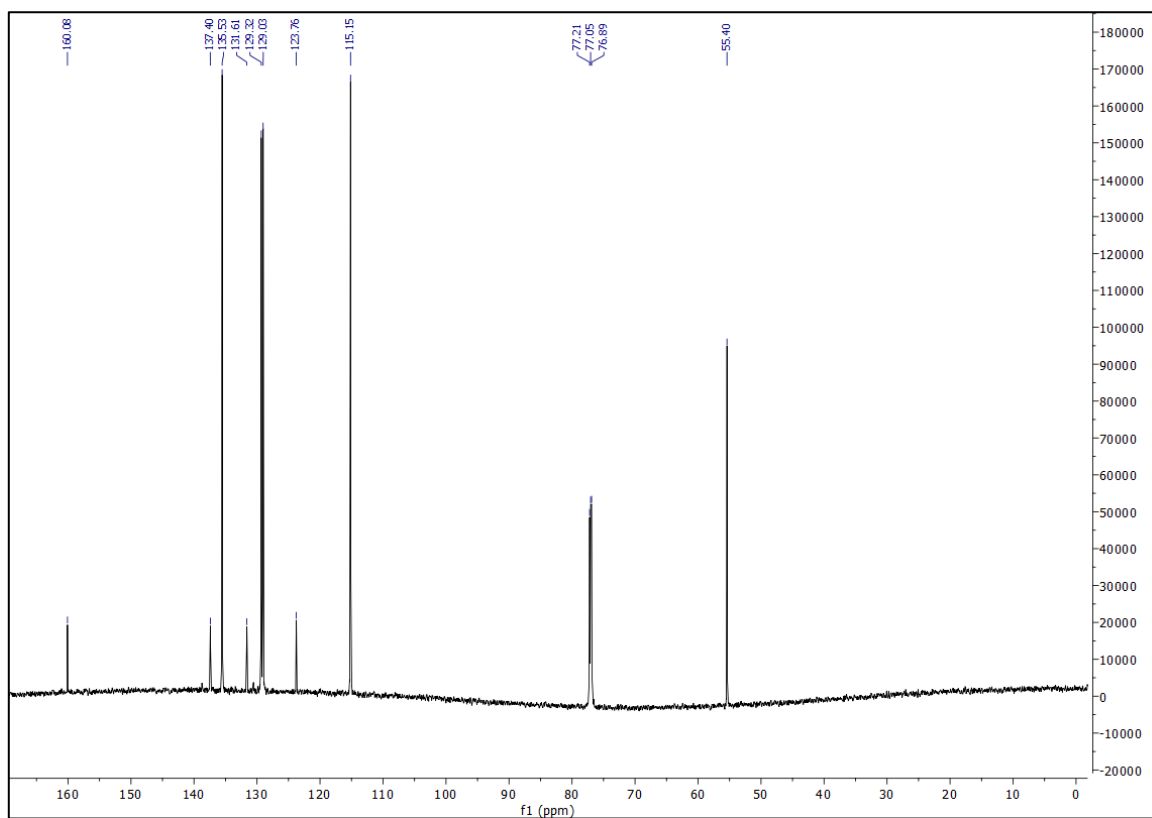

### <sup>1</sup>H NMR of (4q)

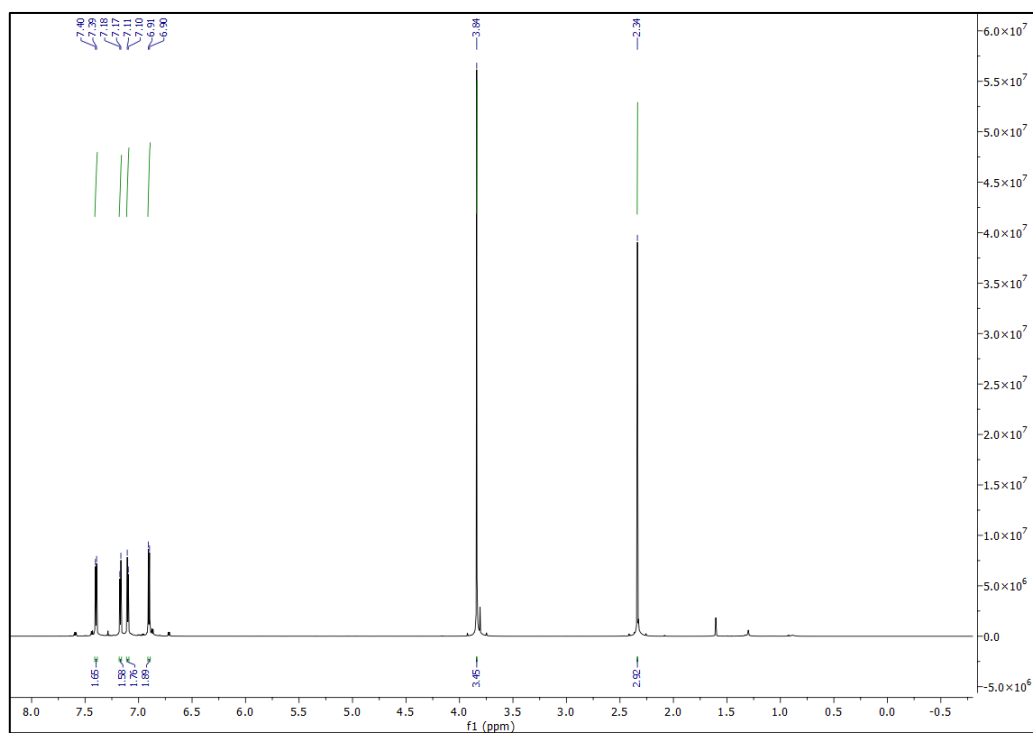

### <sup>13</sup>C NMR of (4q)

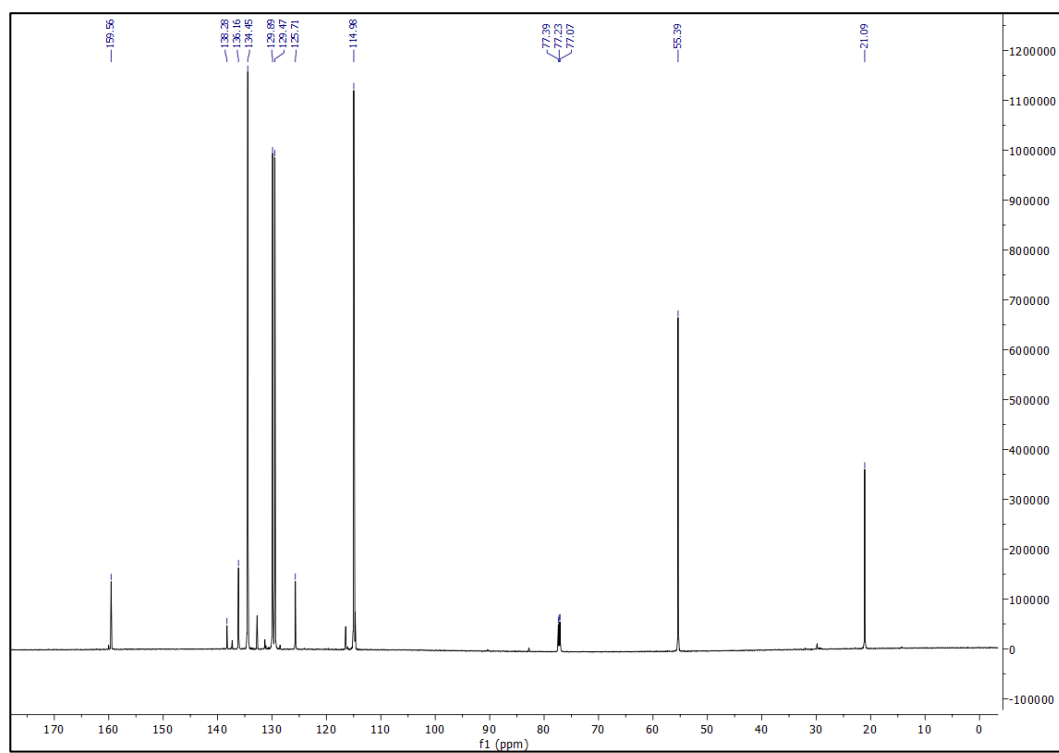

### $^1\text{H}$ NMR of (**4r**)

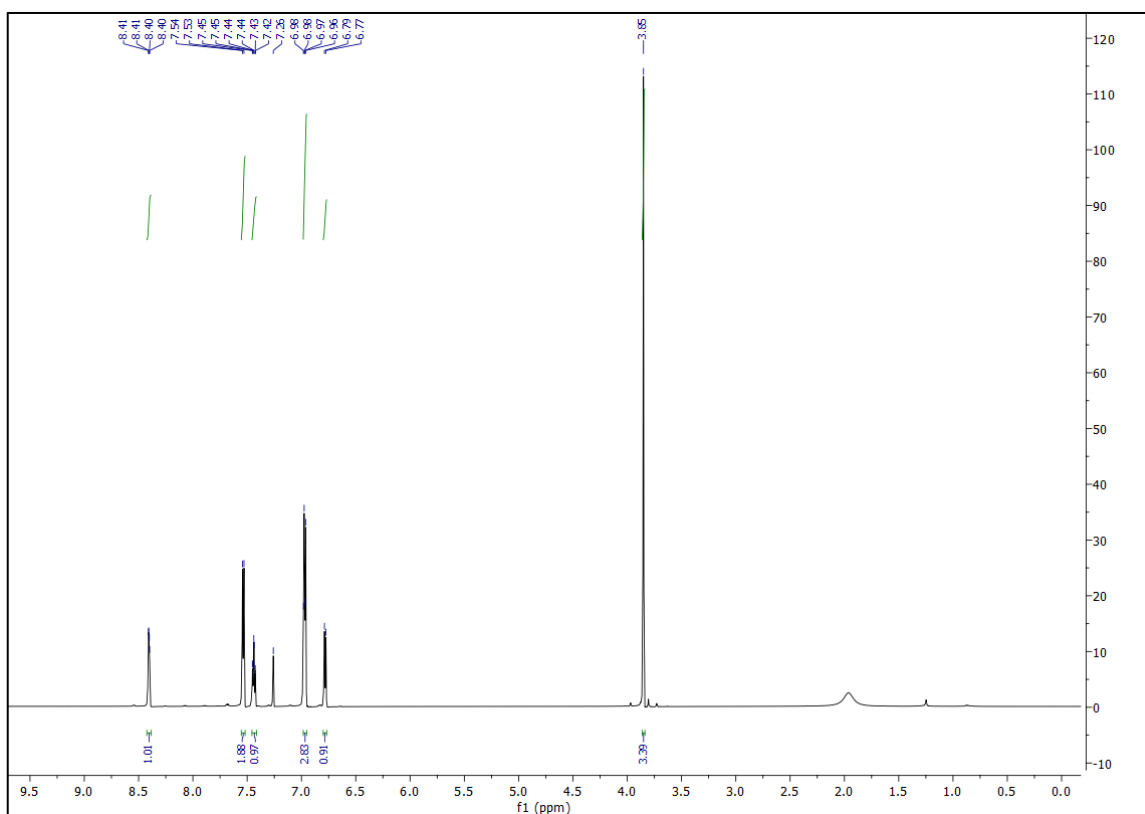

### $^{13}\text{C}$ NMR of (**4r**)

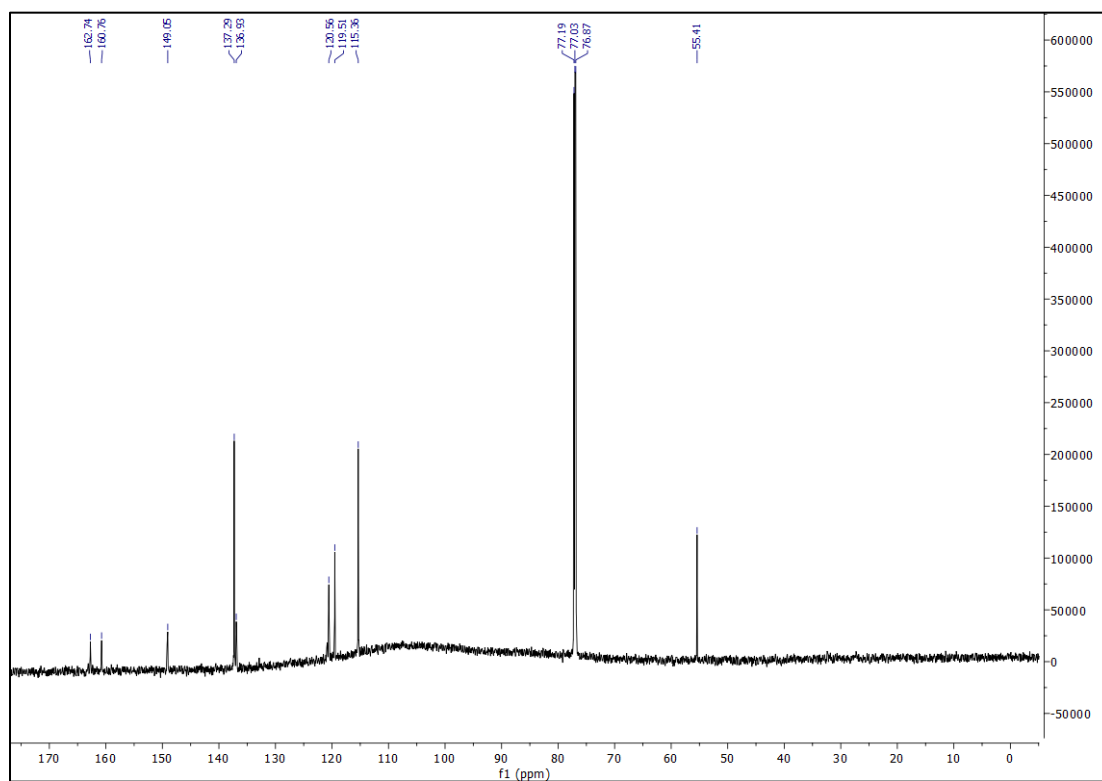

### $^1\text{H}$ NMR of (4s)

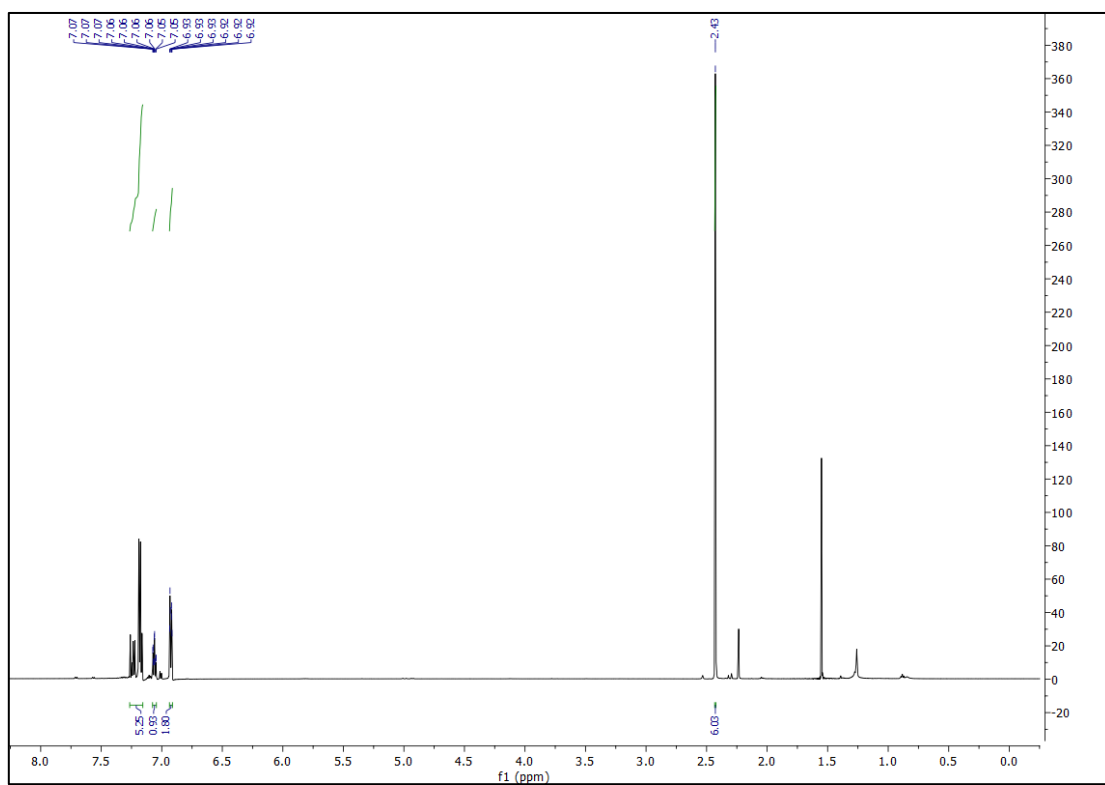

### $^{13}\text{C}$ NMR spectrum of (4s)

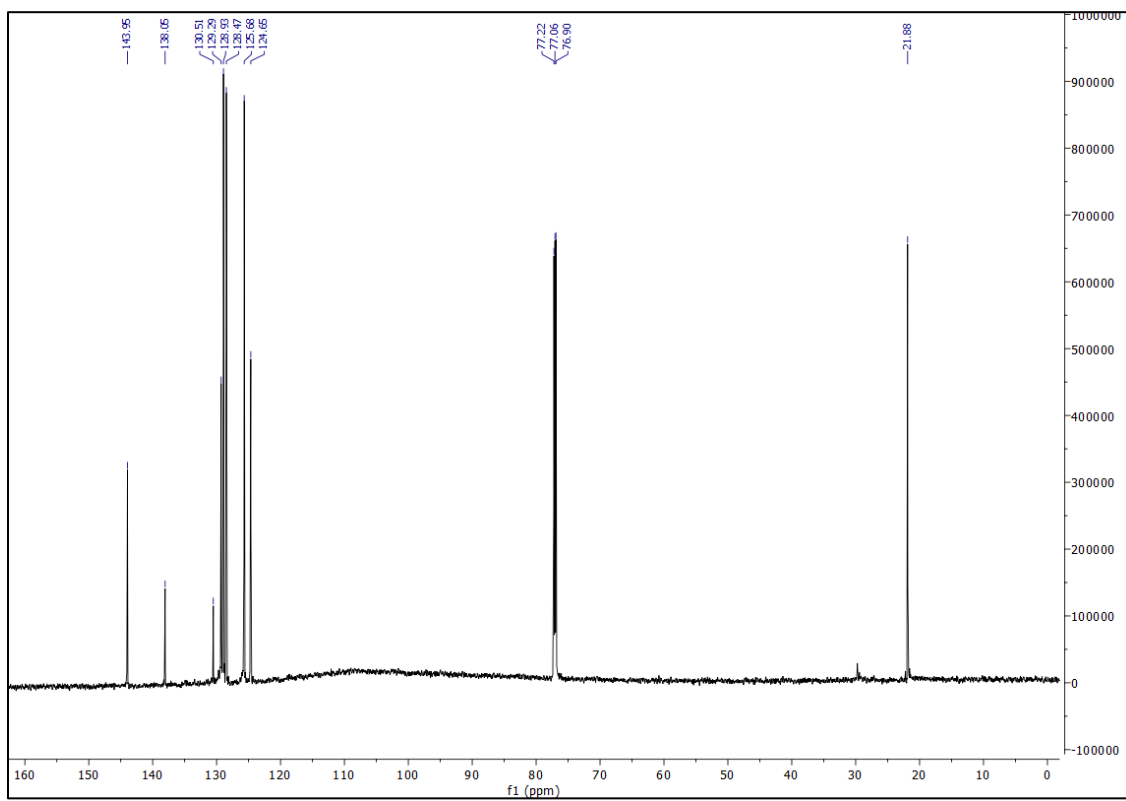

### $^1\text{H}$ NMR of (4t)

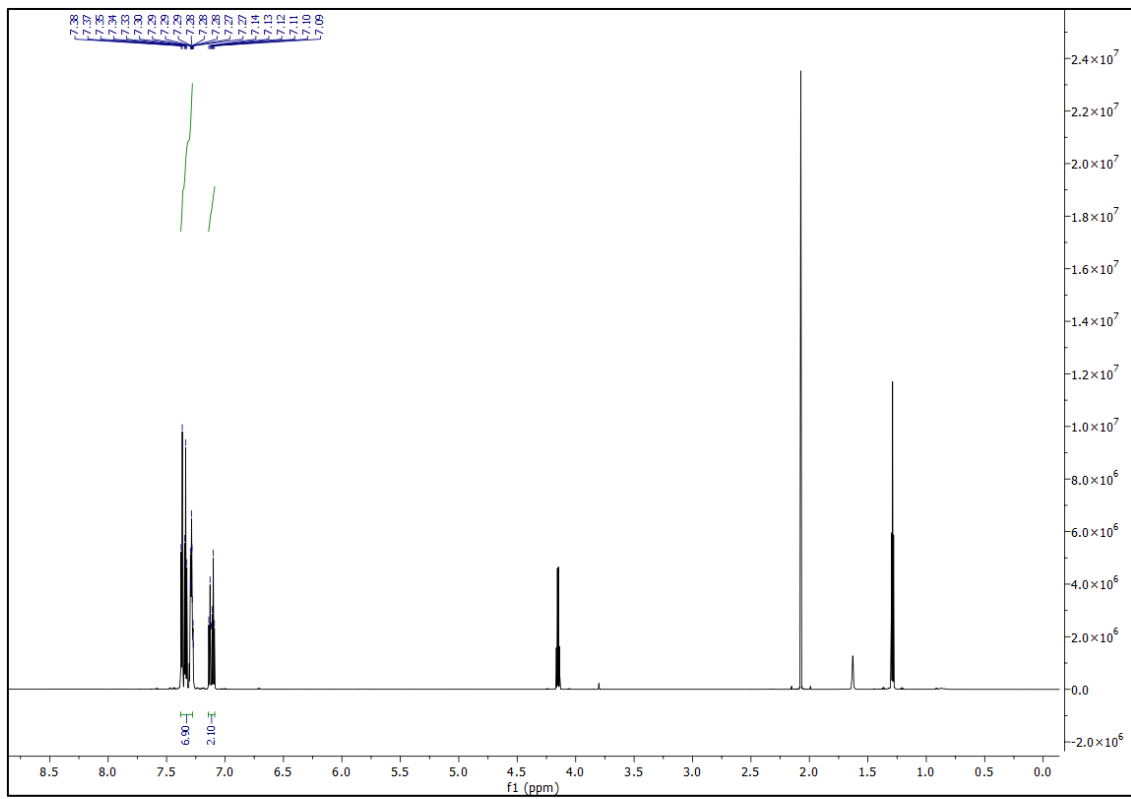

### $^{13}\text{C}$ NMR of (4t)

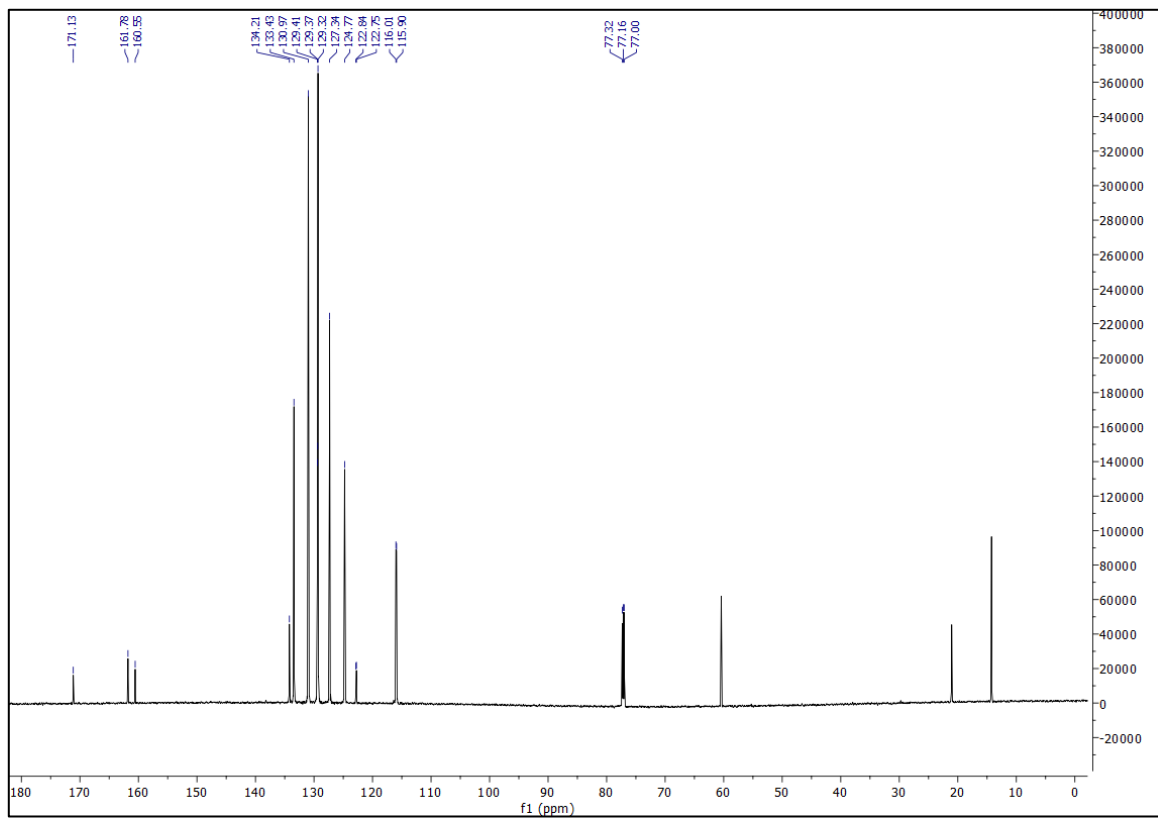



### $^1\text{H}$ NMR of (**4u**)

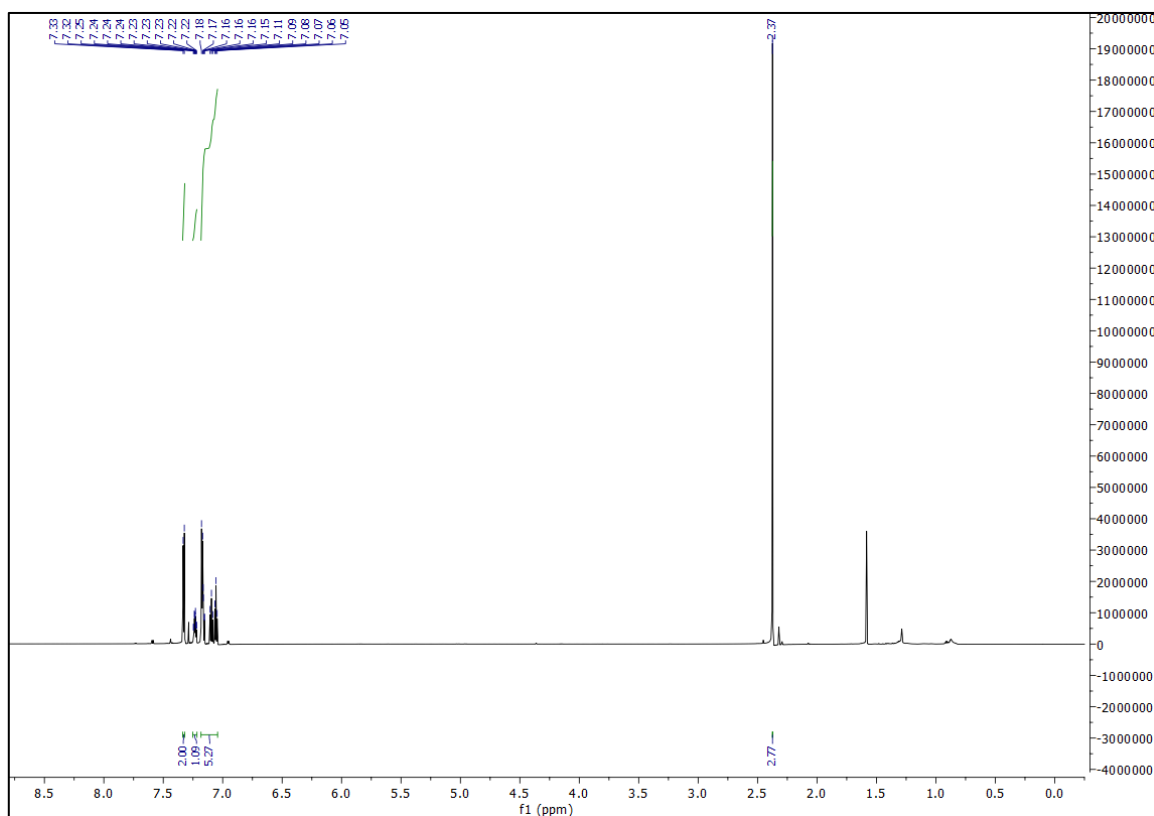

### $^{13}\text{C}$ NMR of (**4u**)

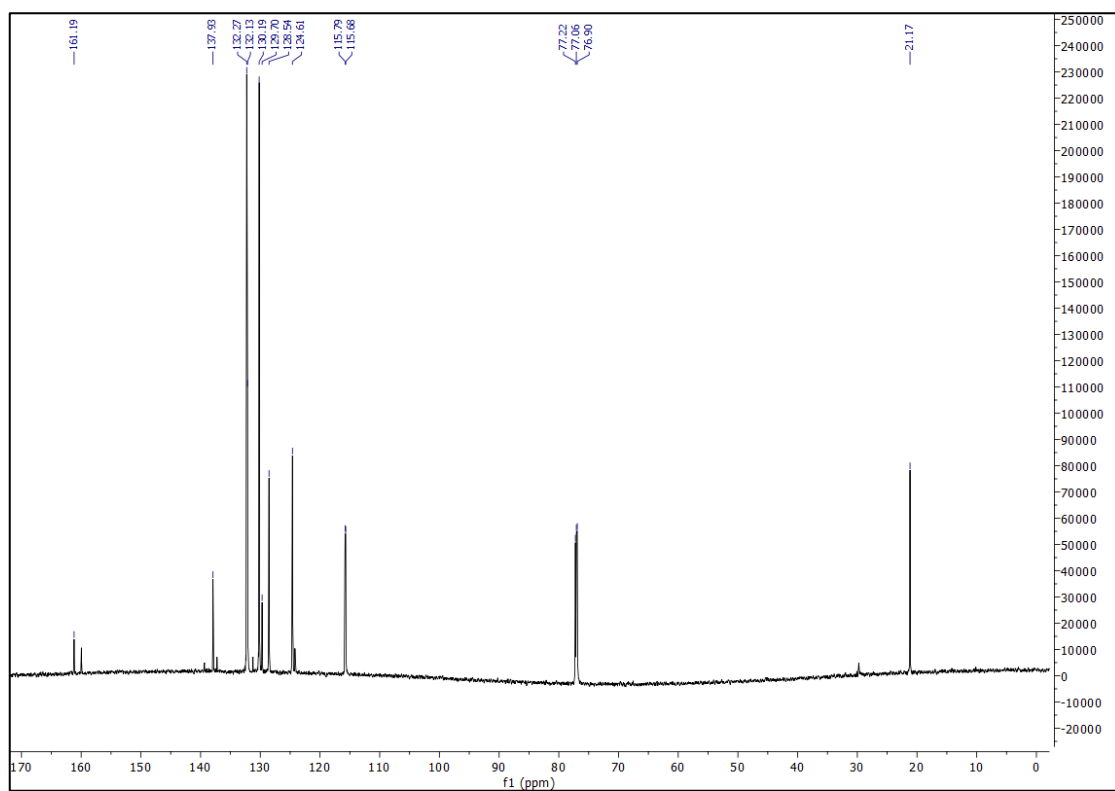

### $^1\text{H}$ NMR of (4v)

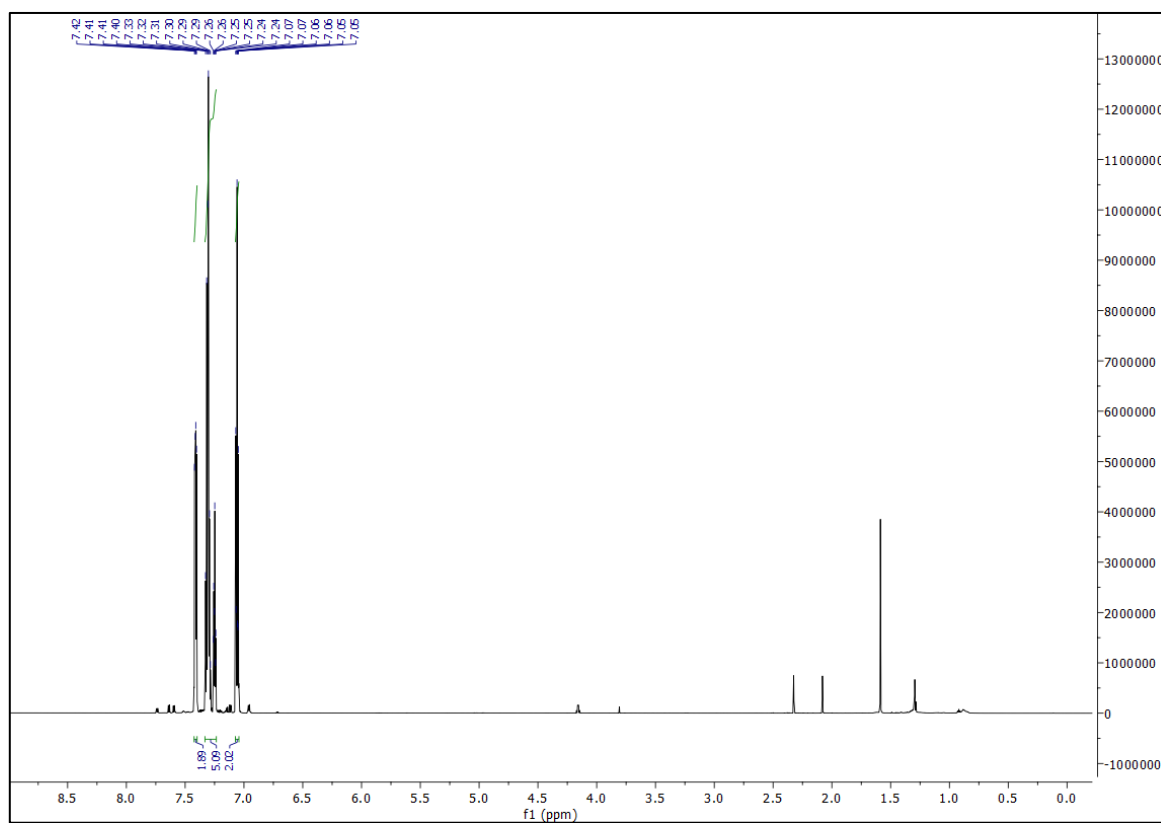

### $^{13}\text{C}$ NMR of (4v)

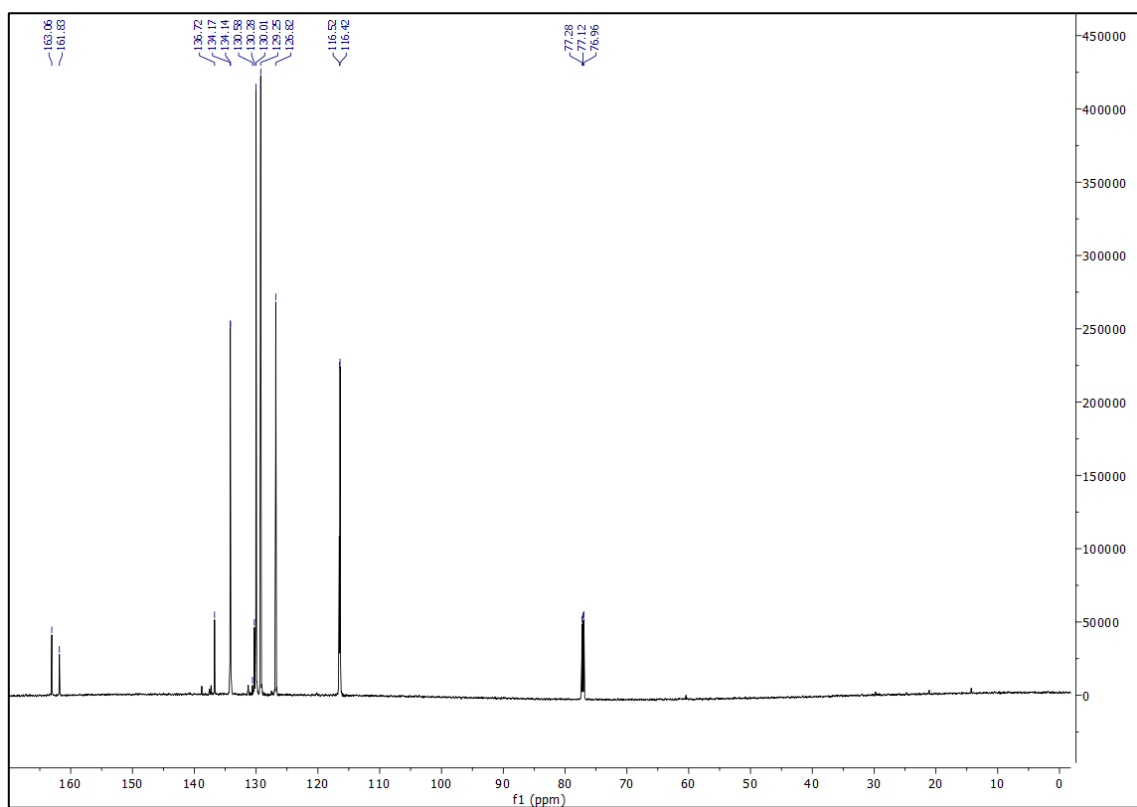

### $^1\text{H}$ NMR of (4w)

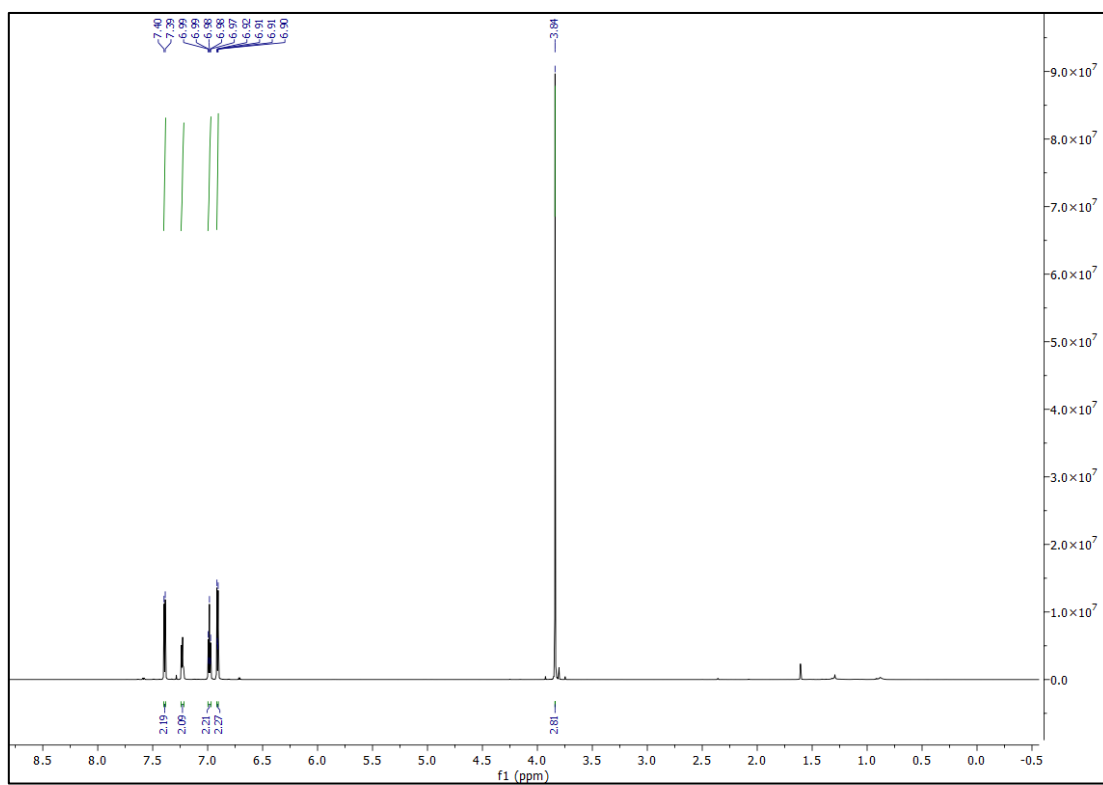

### $^{13}\text{C}$ NMR of (4w)

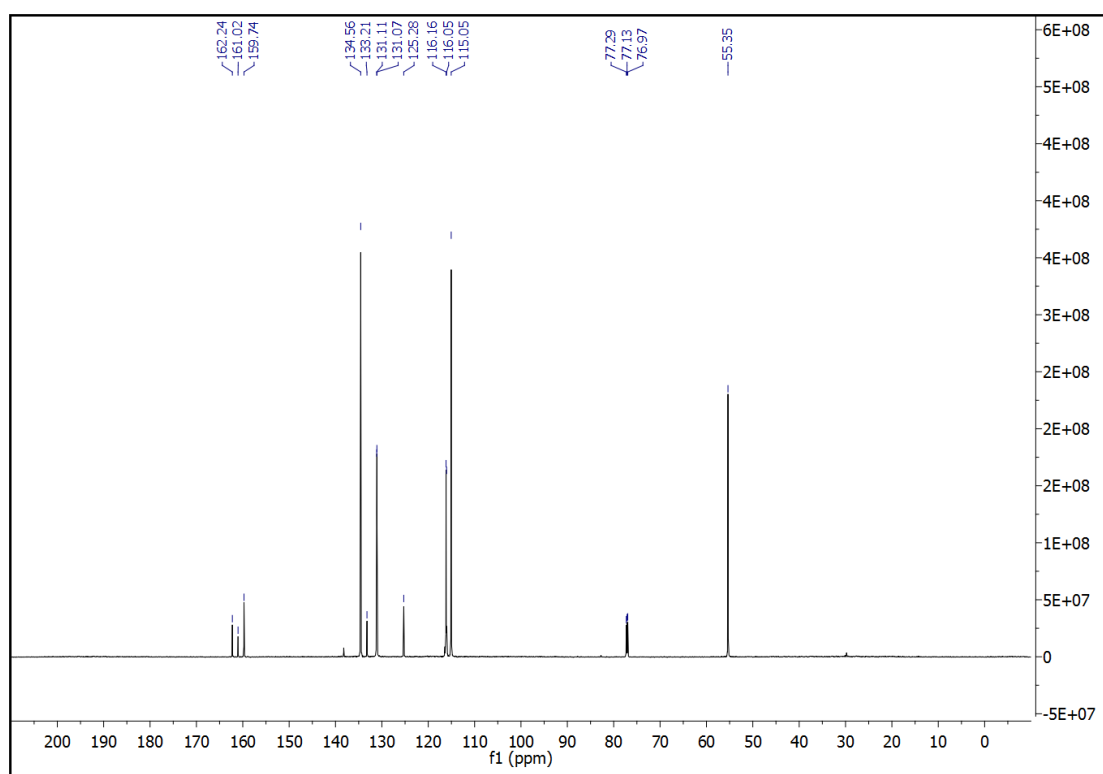

### $^1\text{H}$ NMR of (4x)

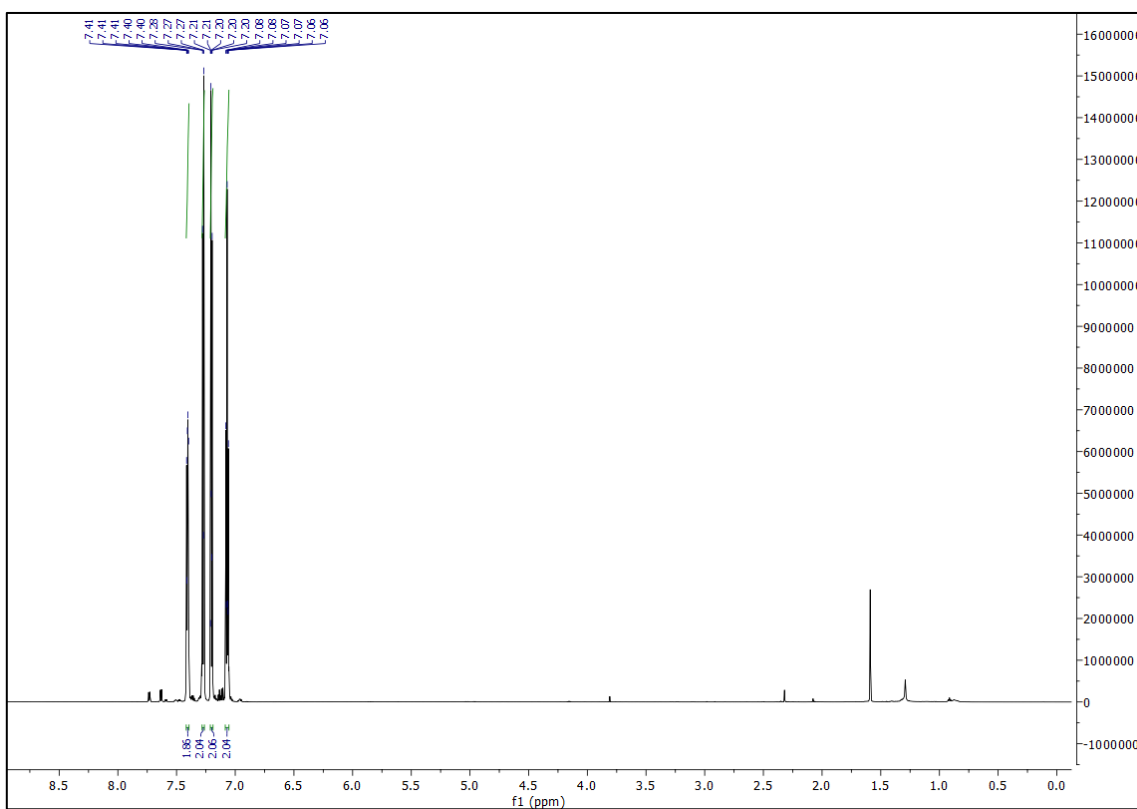

### $^{13}\text{C}$ NMR of (4x)

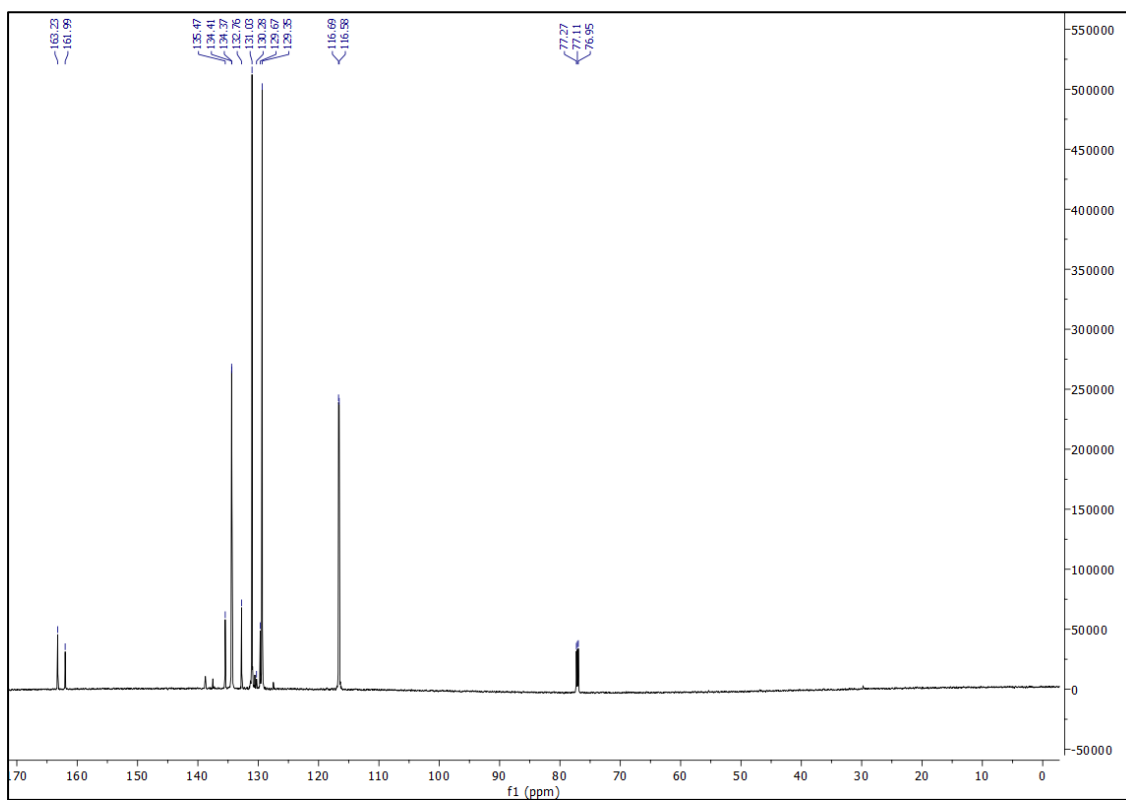

<sup>1</sup>H NMR of (4y)

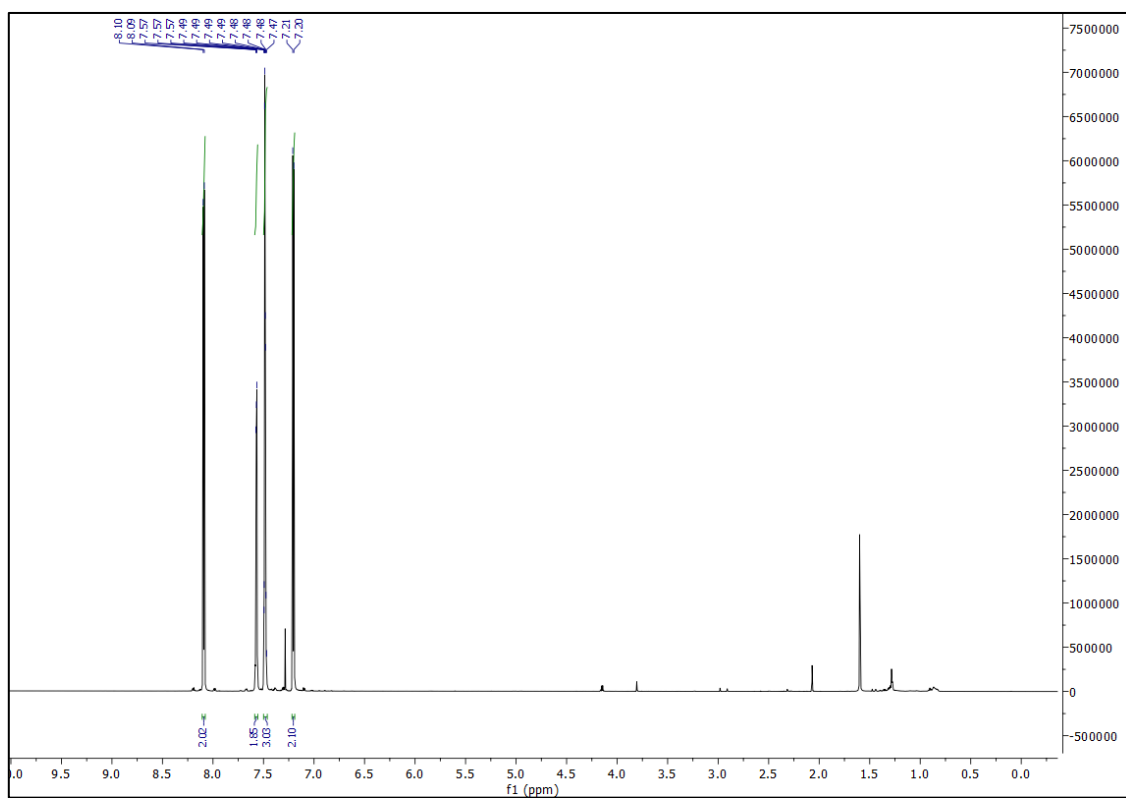

<sup>13</sup>C NMR of (4y)

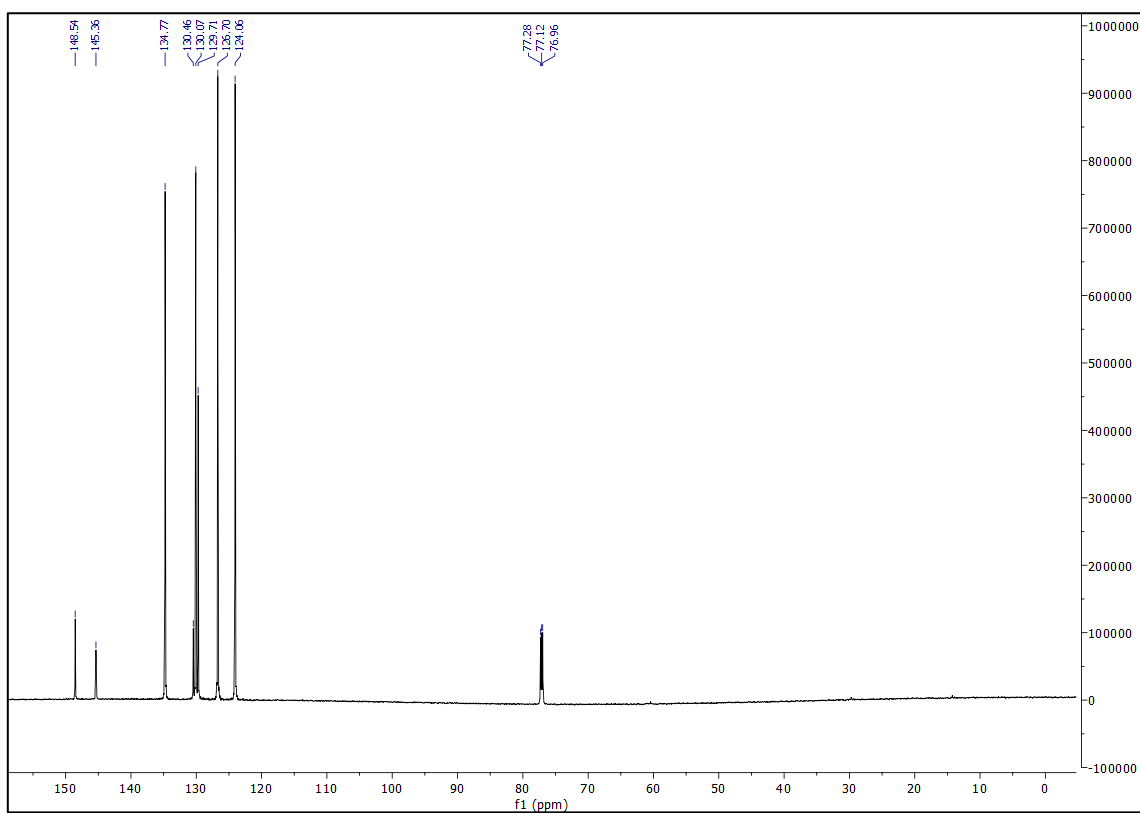

$^1\text{H}$  NMR of (5a)

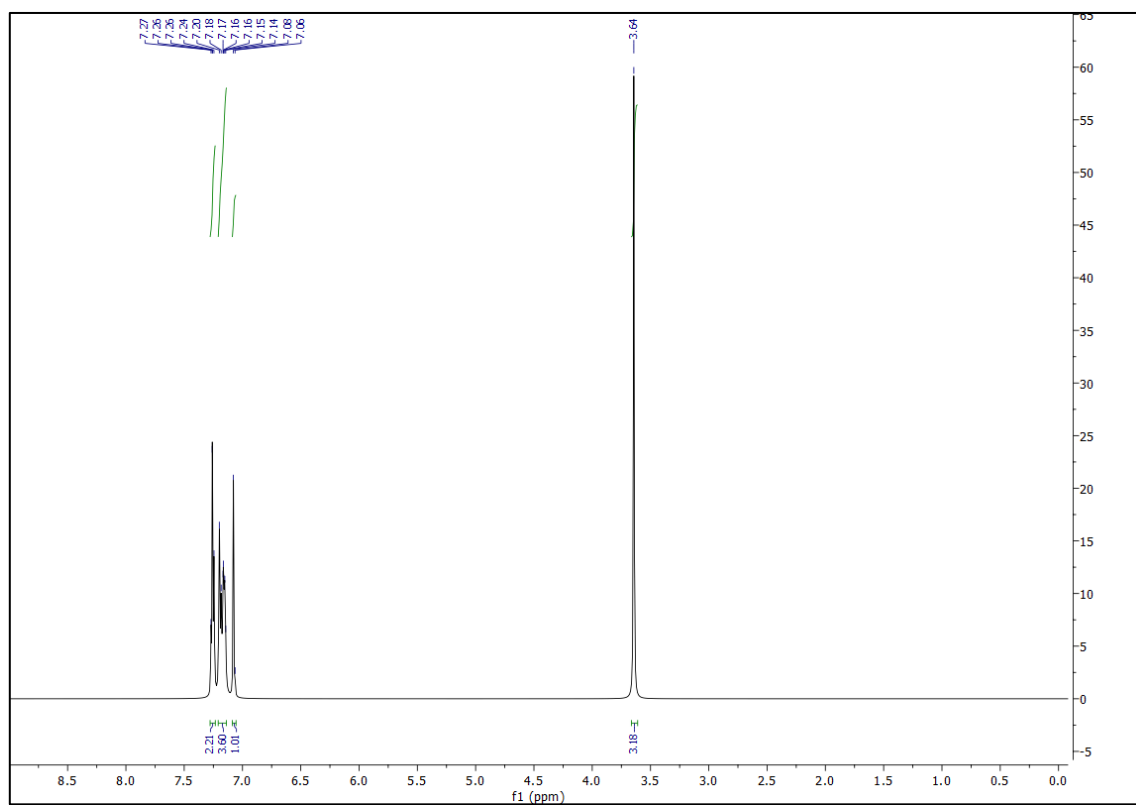

$^{13}\text{C}$  NMR of (5a)

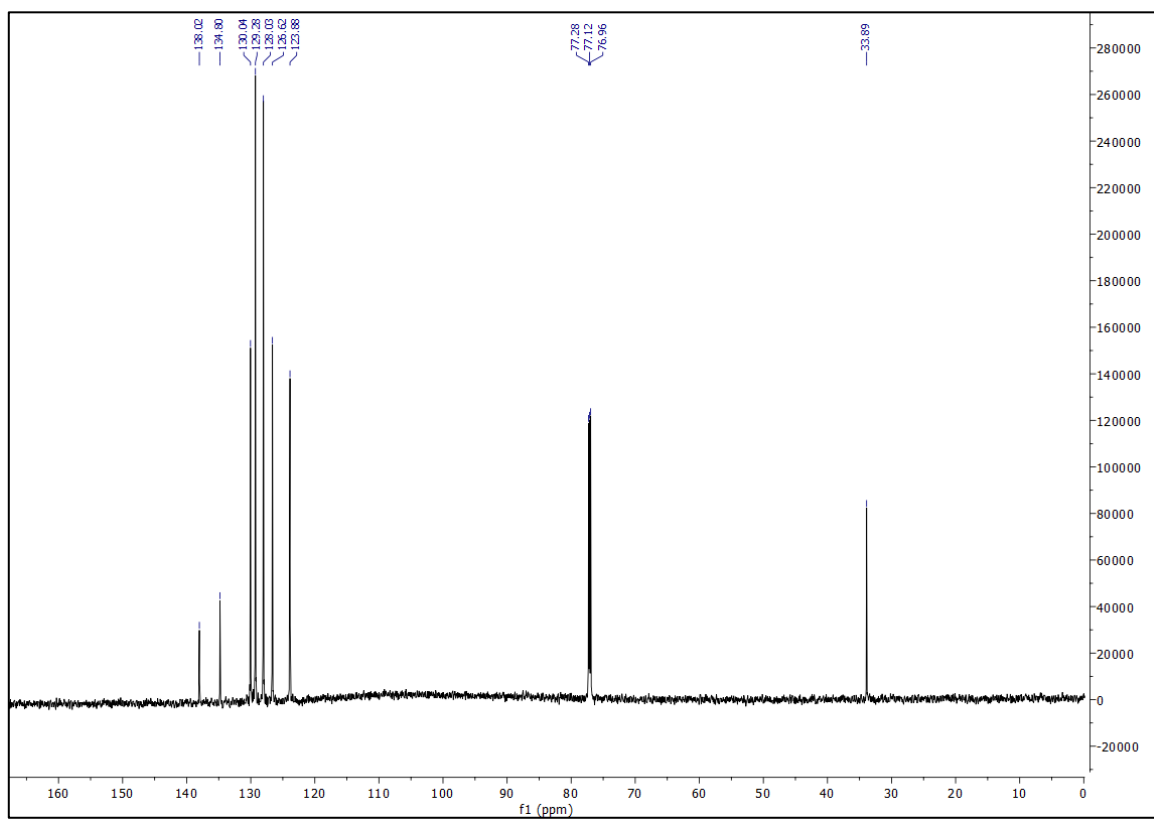

### $^1\text{H}$ NMR of (5b)

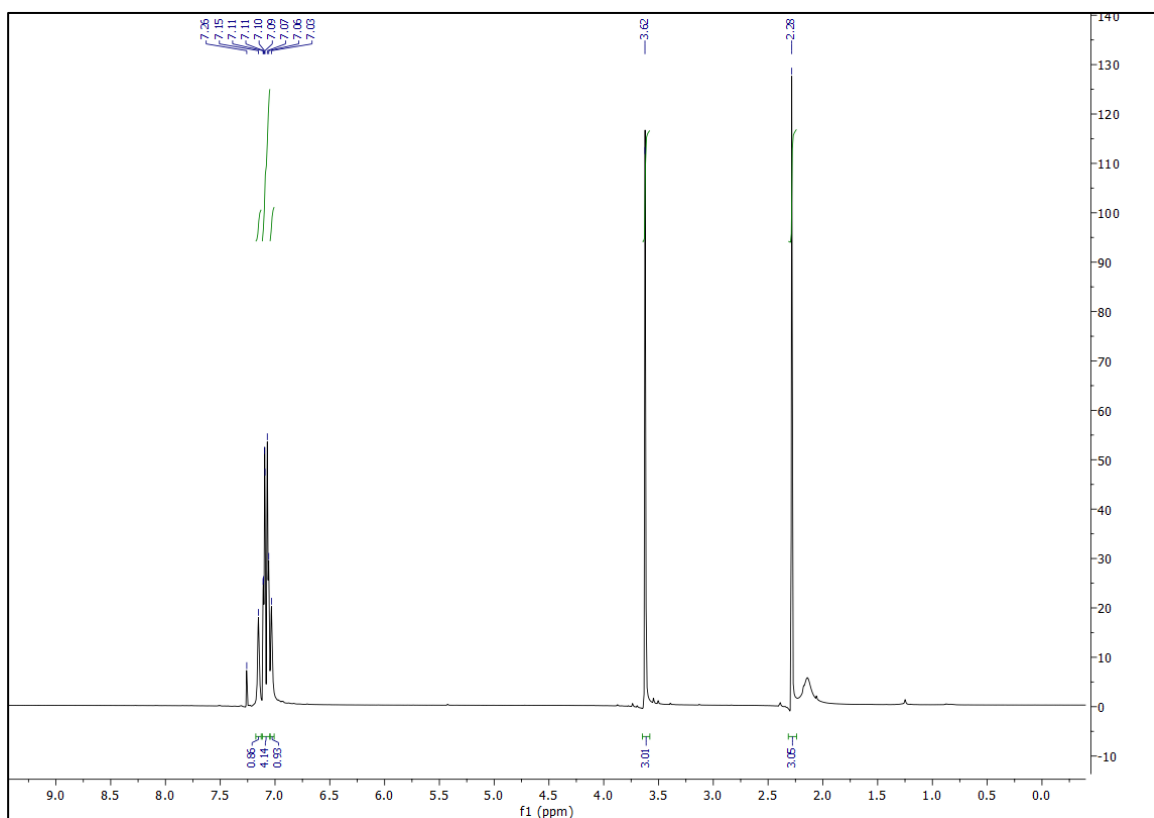

### $^{13}\text{C}$ NMR of (5b)

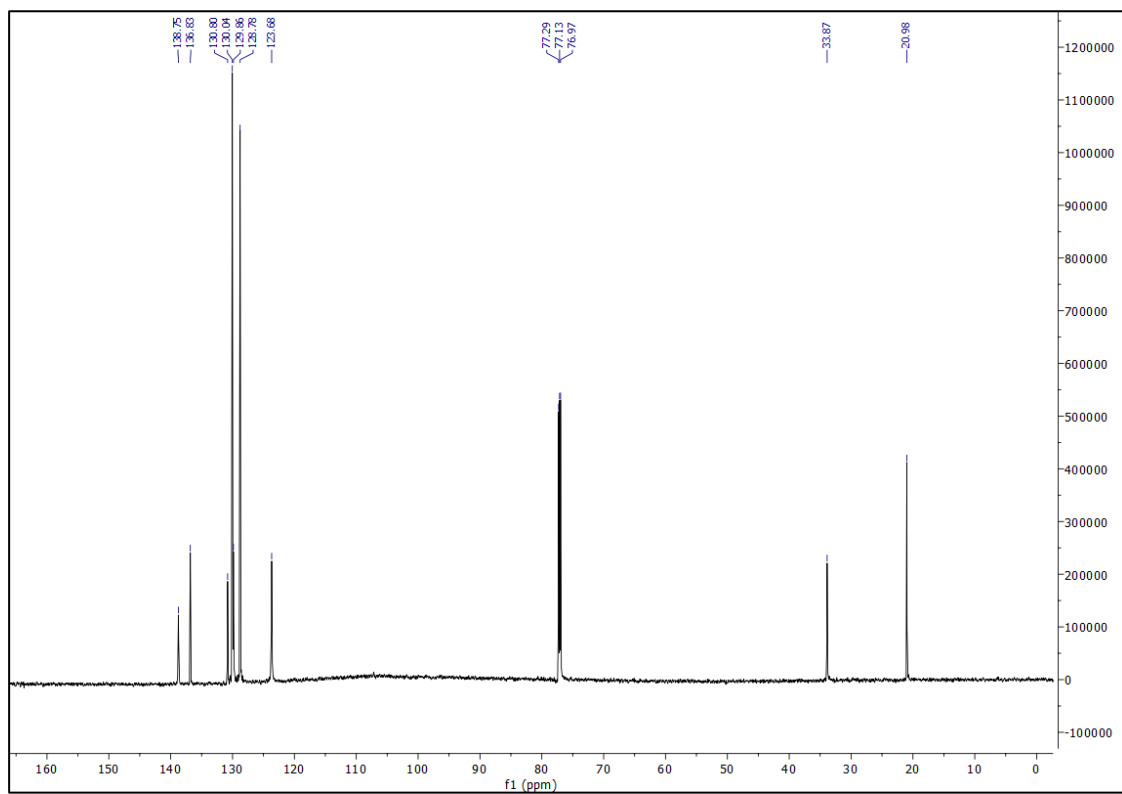

### $^1\text{H}$ NMR of (5c)

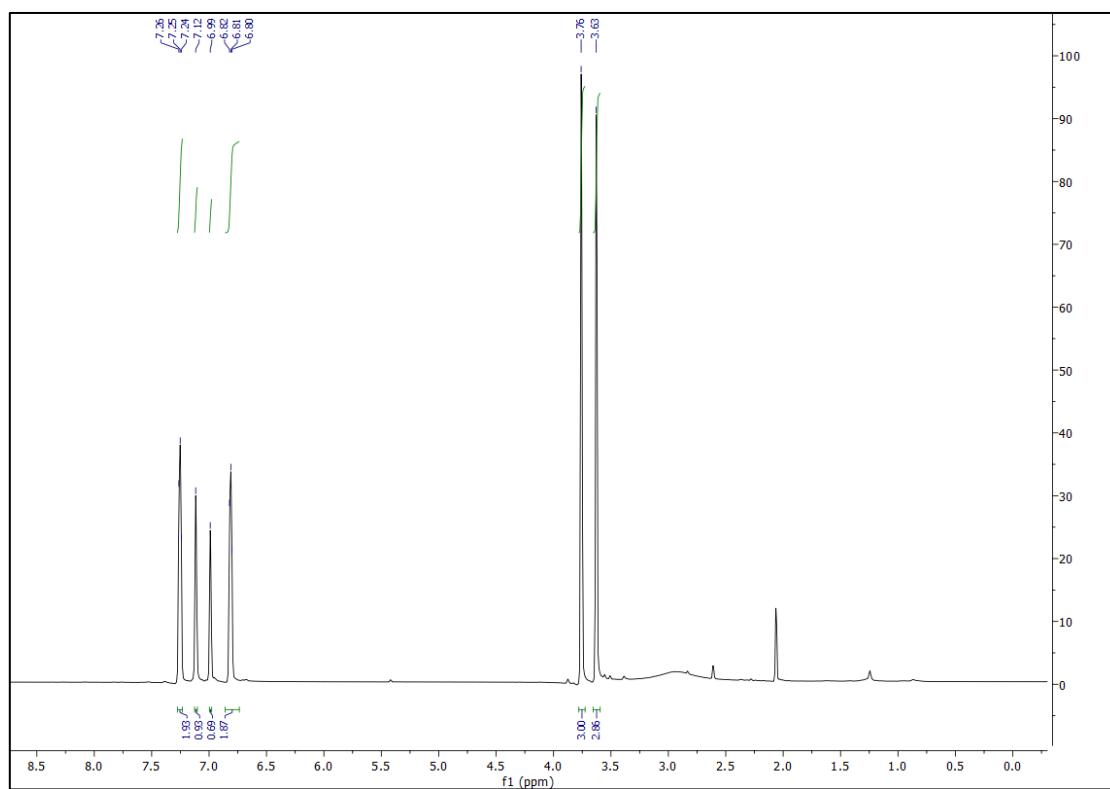

### $^{13}\text{C}$ NMR of (5c)

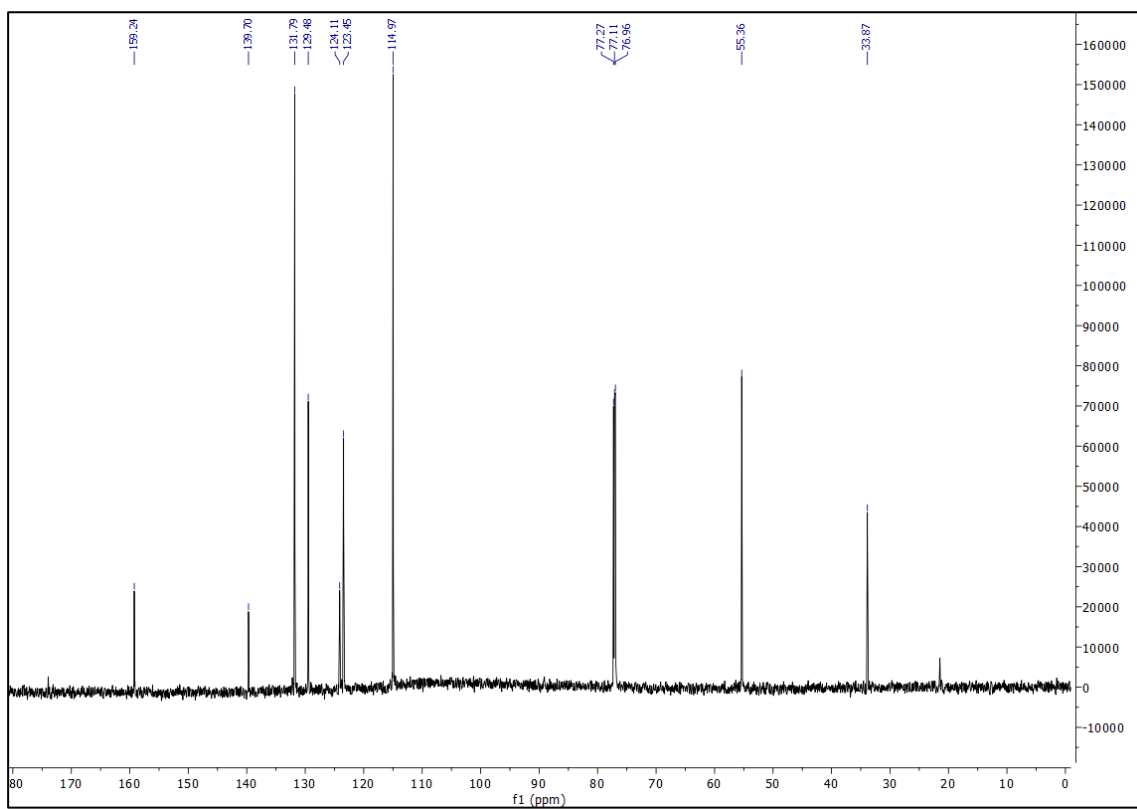



### $^1\text{H}$ NMR of (5d)

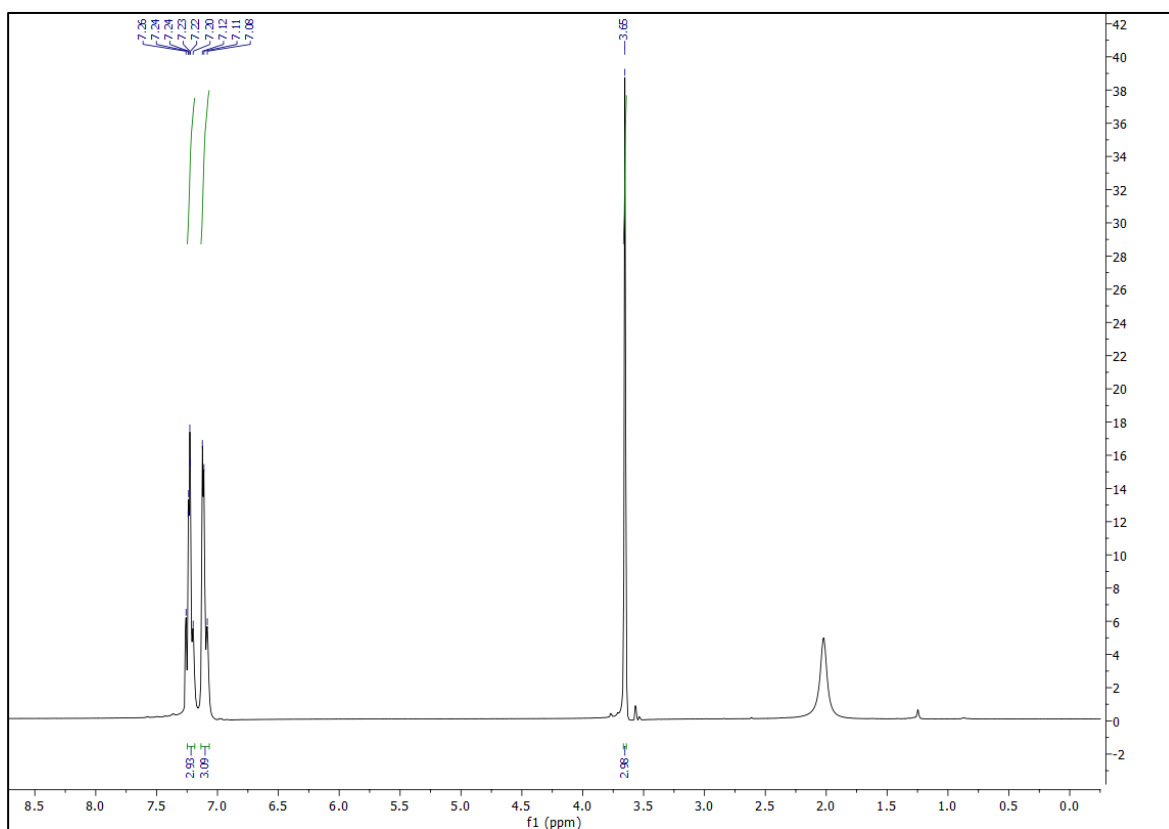

### $^{13}\text{C}$ NMR of (5d)

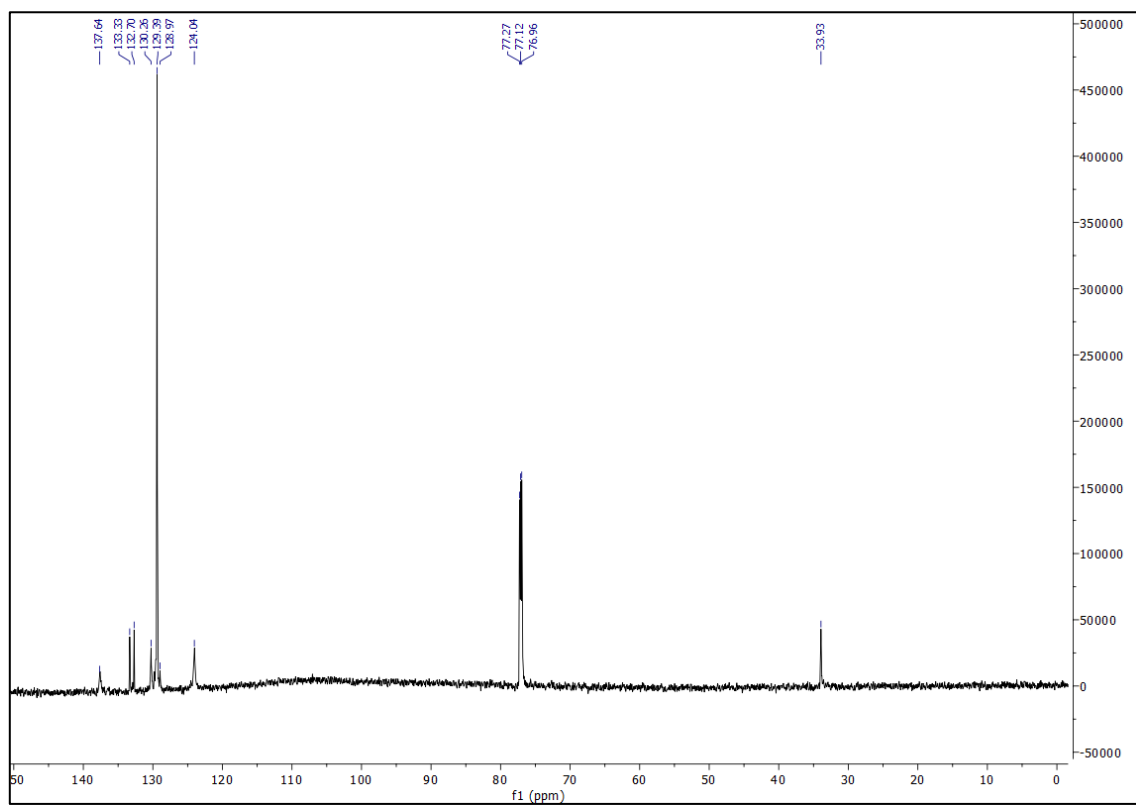

$^1\text{H}$  NMR of (5e)

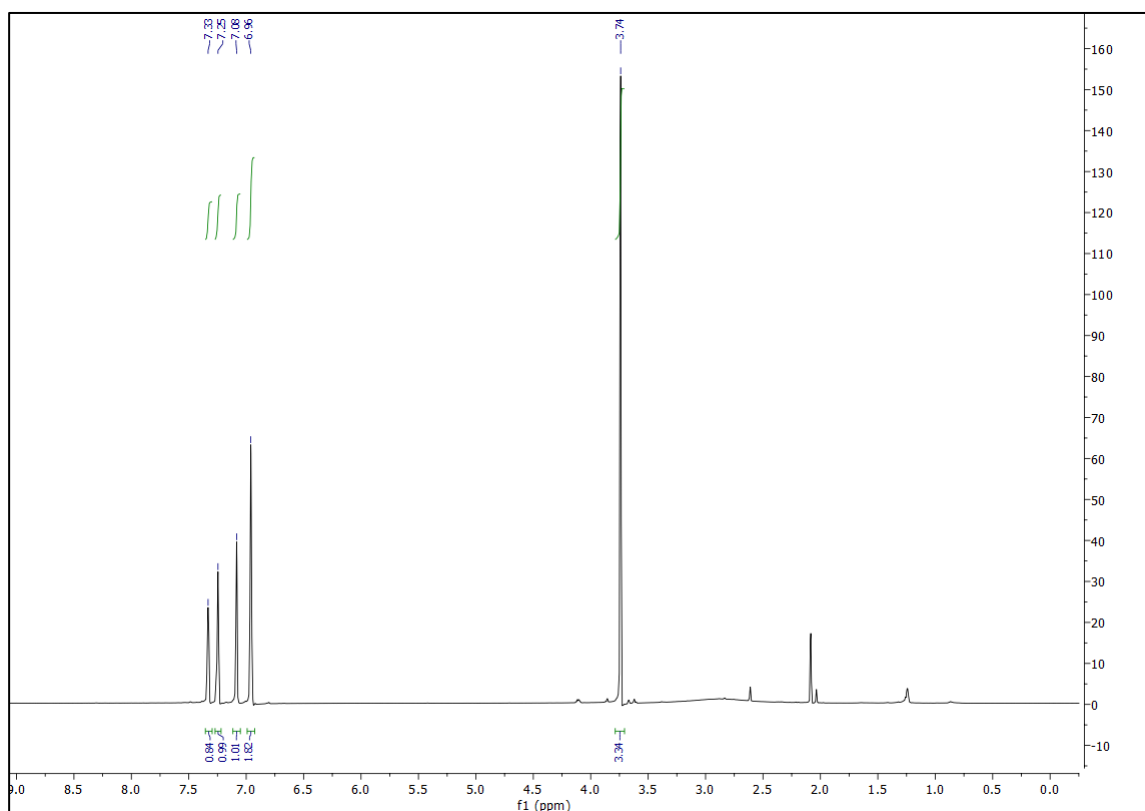

$^{13}\text{C}$  NMR of (5e)

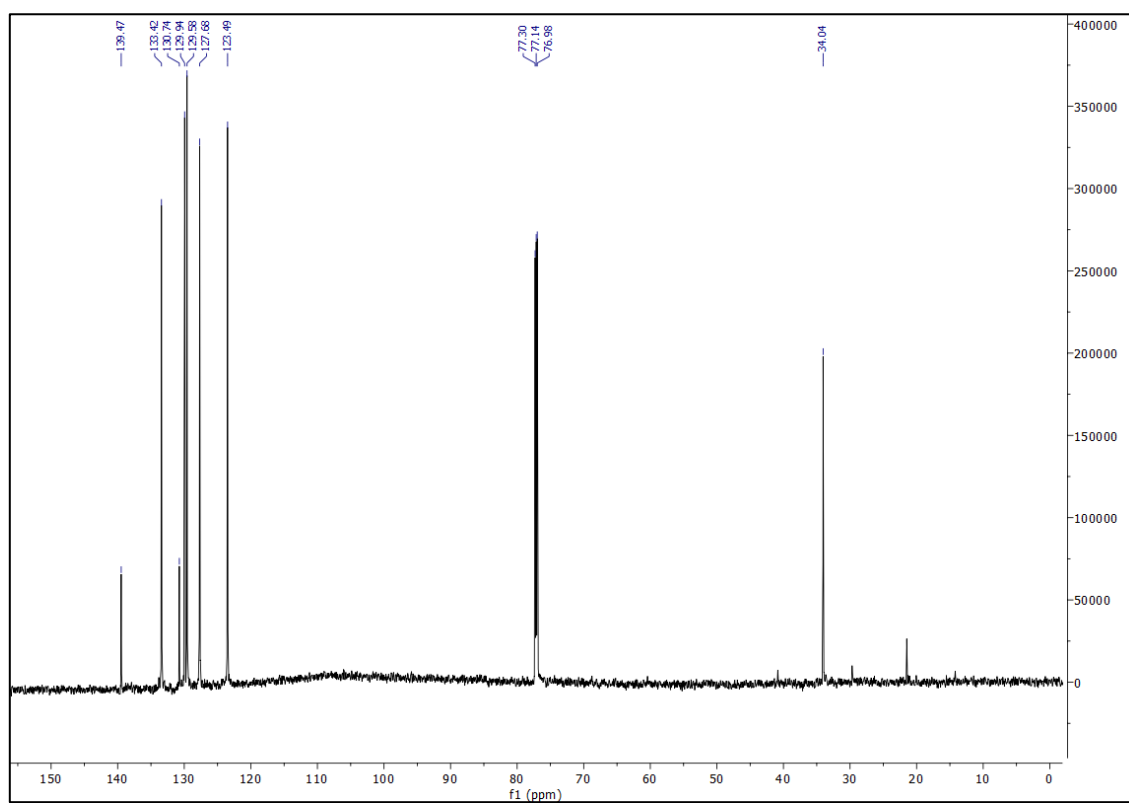

### $^1\text{H}$ NMR of (3k)

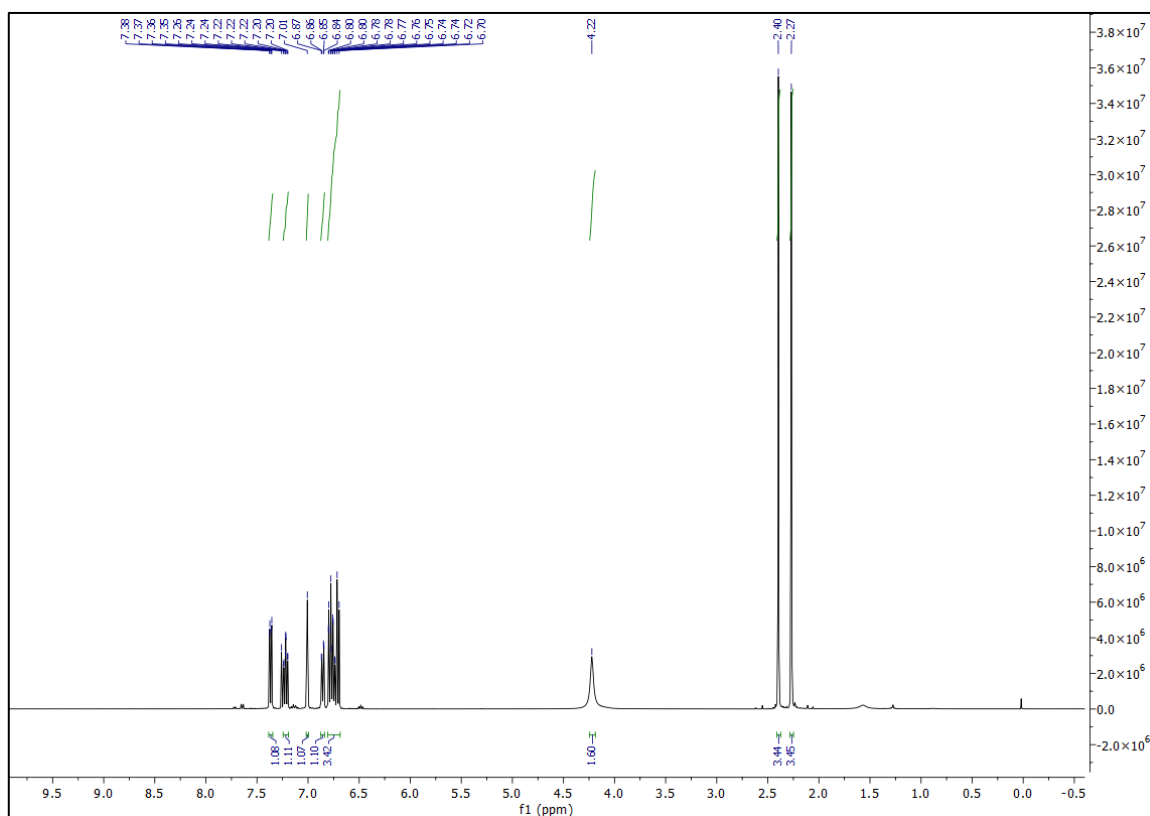

### $^{13}\text{C}$ NMR of (3k)

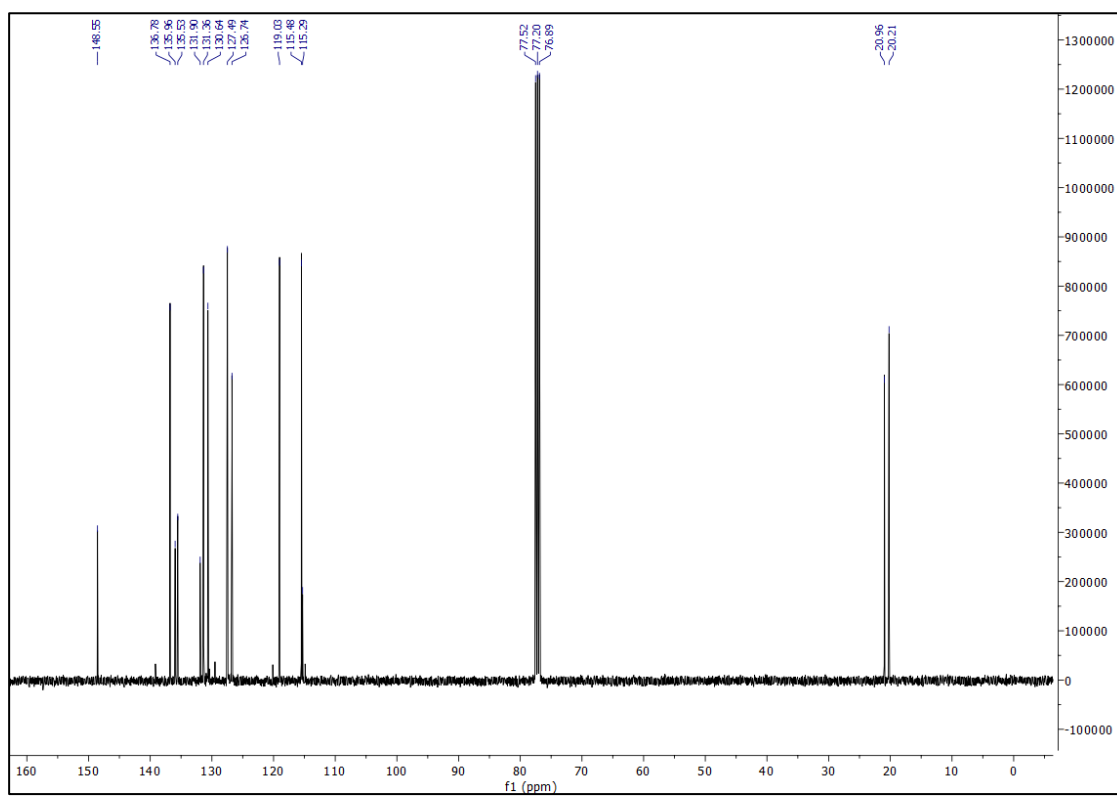

### $^1\text{H}$ NMR of (9)

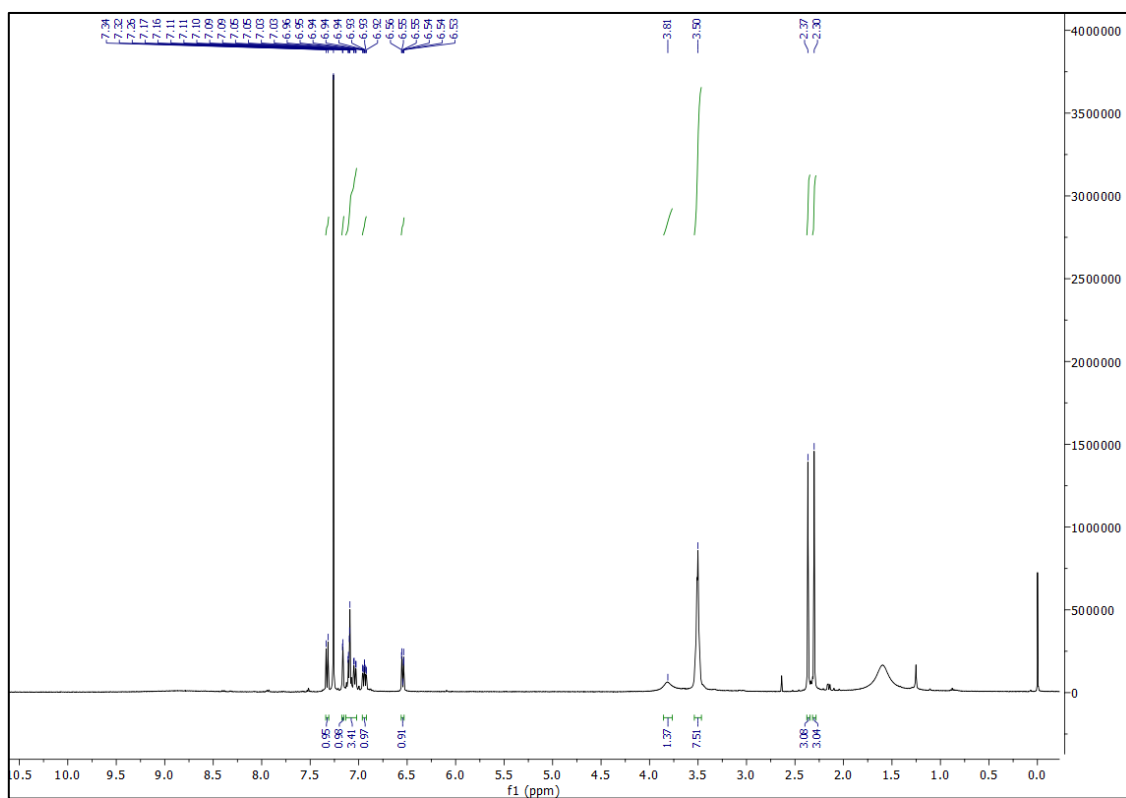

### $^{13}\text{C}$ NMR of (9)

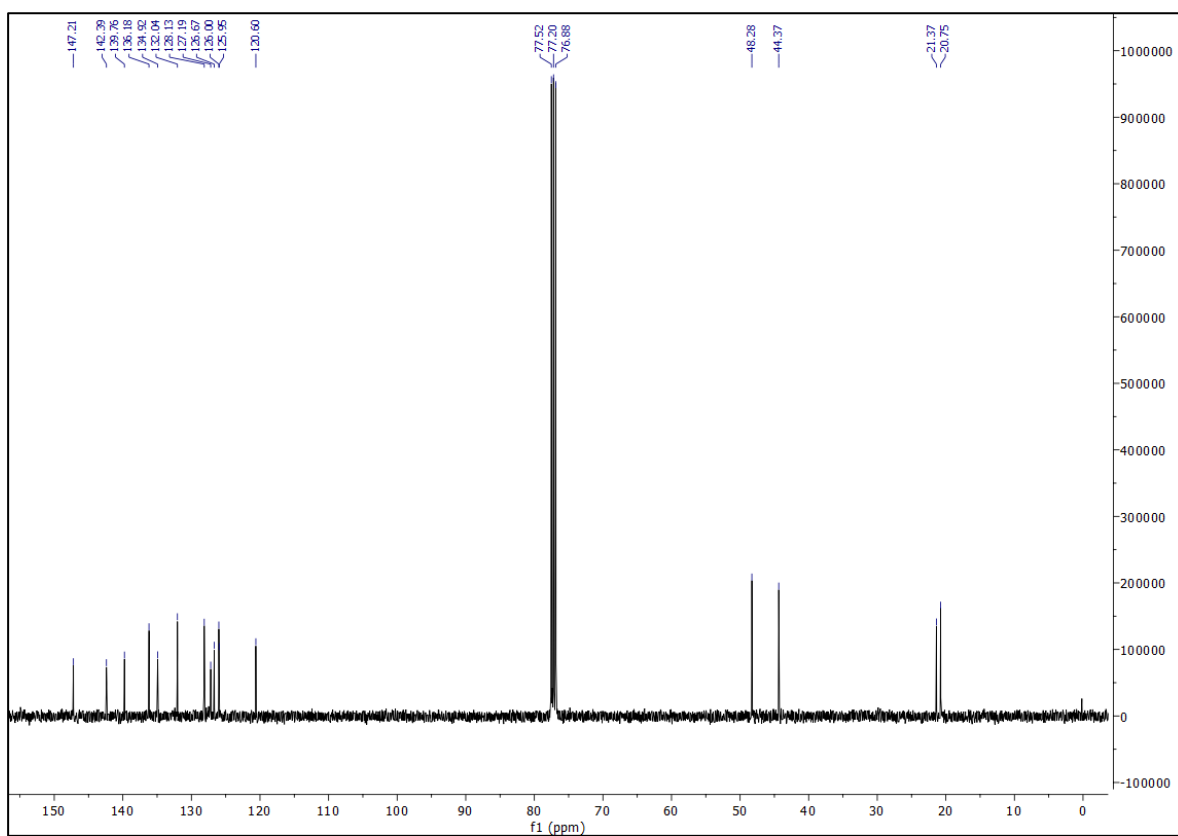

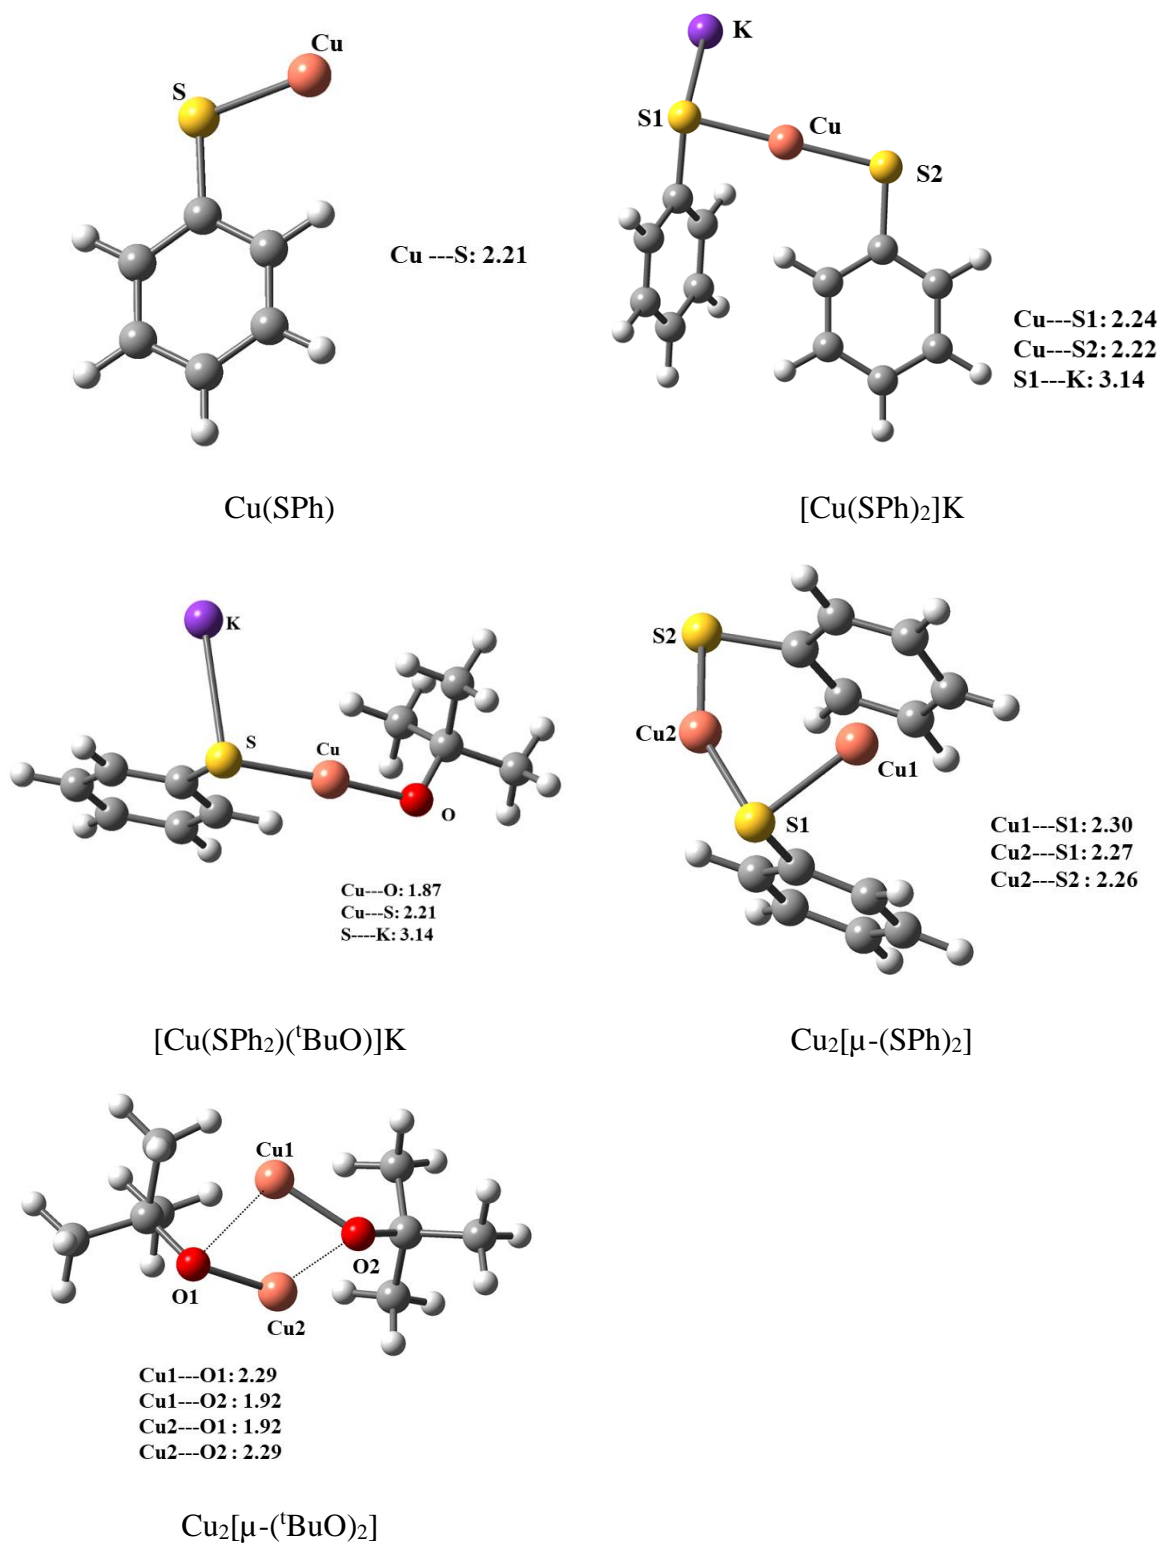

**Figure S1.** Optimized geometries of Cu complexes shown in Scheme 8

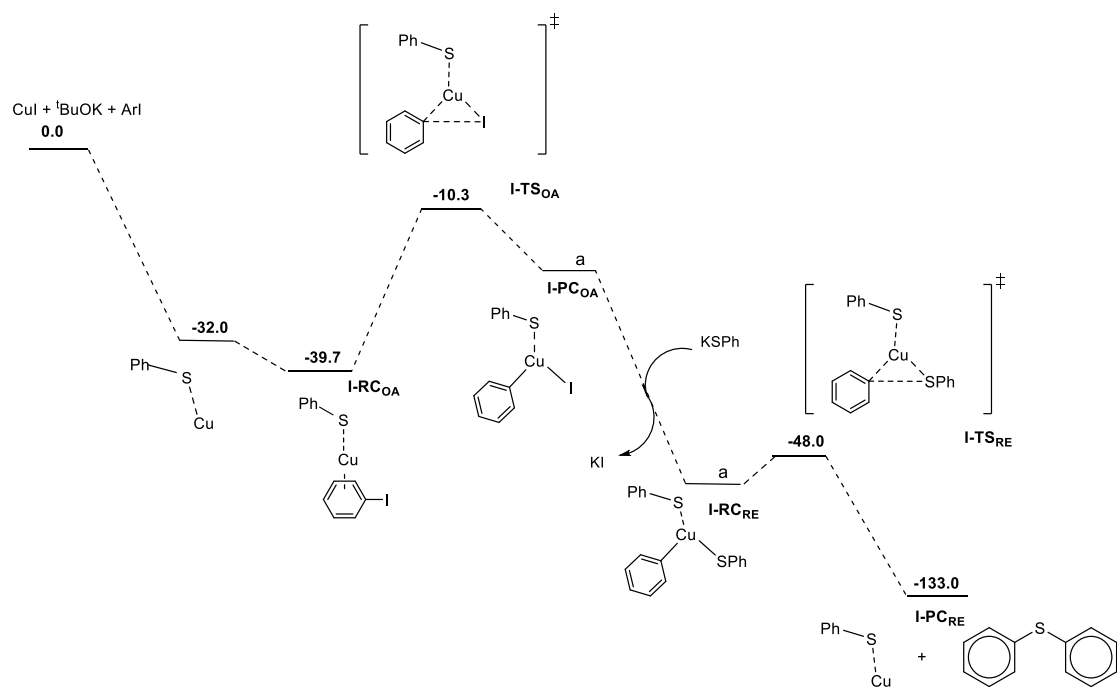

**Scheme S1.** Reaction Profile diagram for pathway **I** initiated by  $\text{Cu}(\text{SPh})_3$ . Optimization of  $\text{I-PC}_{0A}$  and  $\text{I-RC}_{RE}$  failed to locate a desired intermediate.

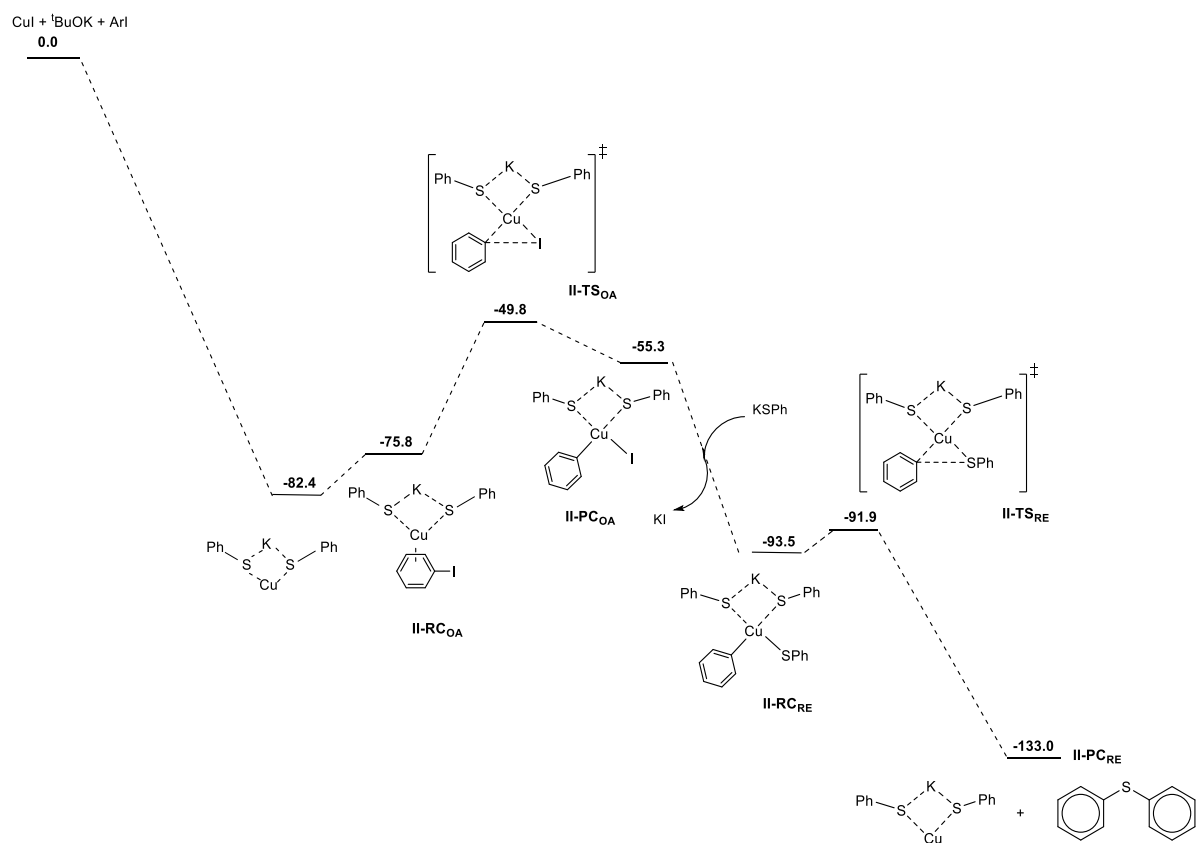

**Scheme S2.** Reaction Profile diagram for pathway **II** initiated by  $[\text{Cu}(\text{SPh})_2]\text{K}$

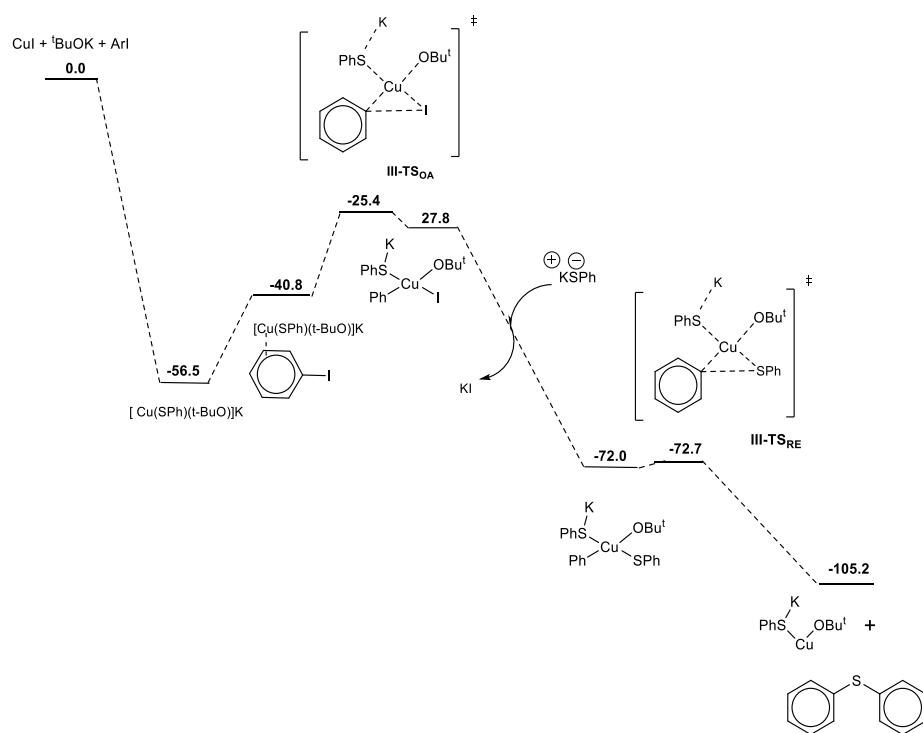

**Scheme S3.** Reaction Profile diagram for pathway–**III** initiated by  $[\text{Cu}(\text{SPh})(\text{O}^t\text{Bu})]\text{K}$

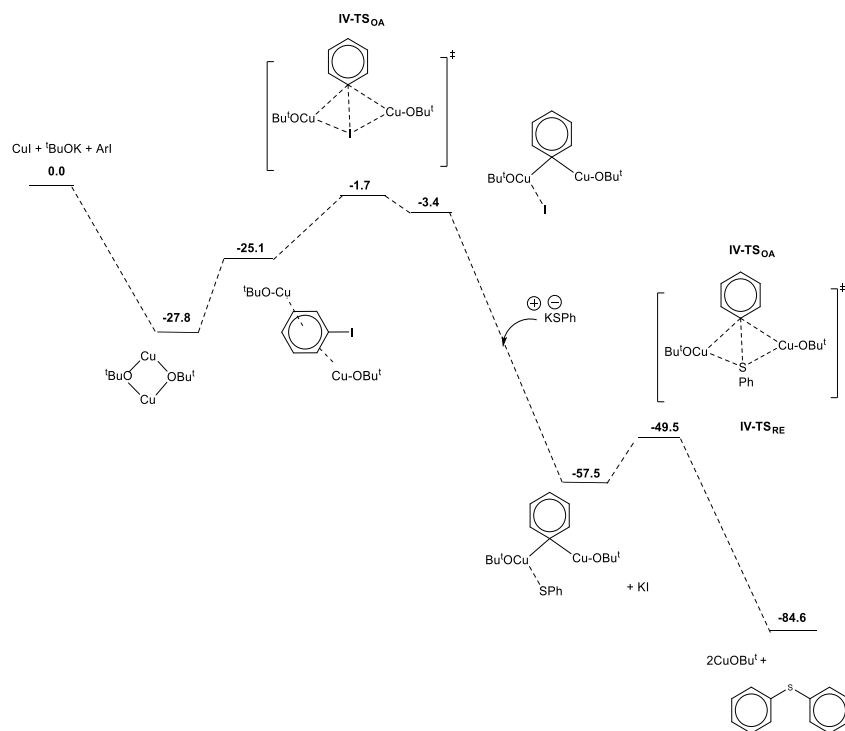

**Scheme S4.** Reaction Profile diagram for pathway–**IV** initiated by  $\text{Cu}_2[\mu-({}^t\text{BuO})_2]$

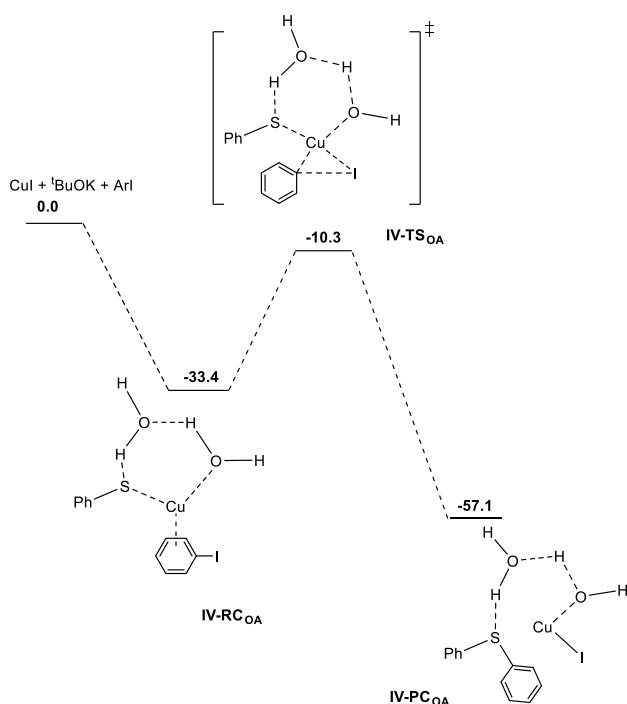

**Scheme S5.** Reaction Profile diagram for pathway-V (Solvent Assisted). <sup>a</sup>Despite of repeated attempts, we failed to locate **V-TS<sub>RE</sub>** (transition state for reductive elimination).

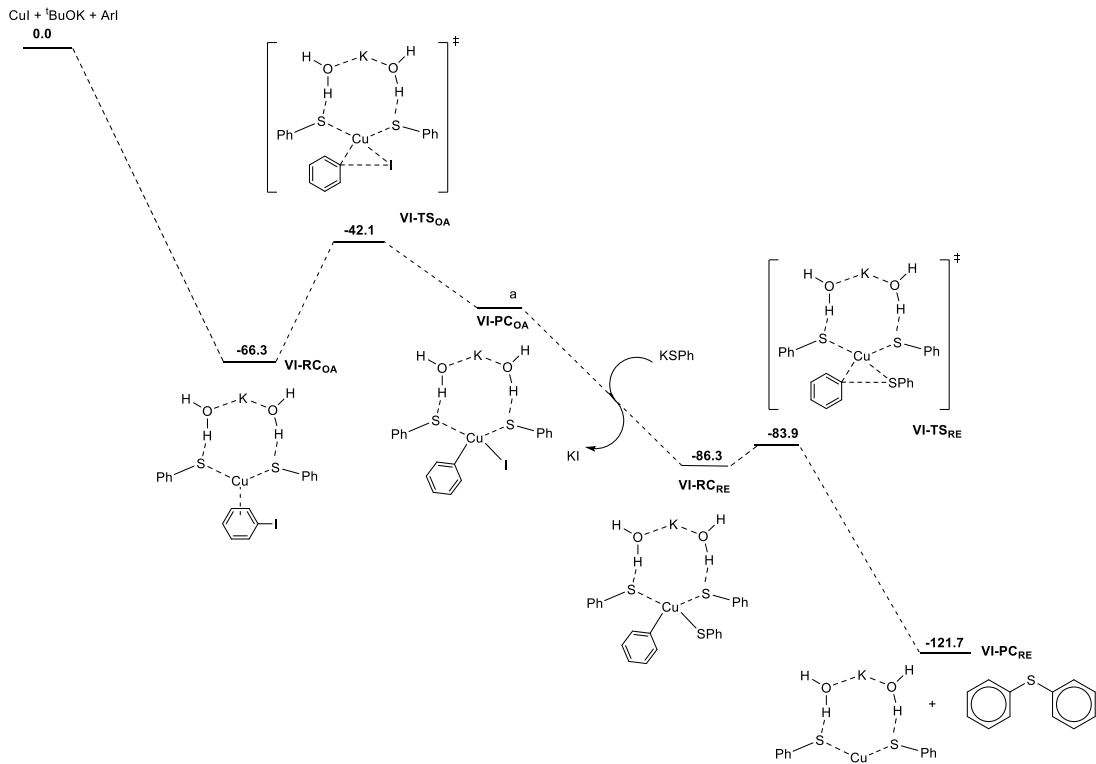

**Scheme S6.** Reaction Profile diagram for pathway-VI (Solvent Assisted). <sup>a</sup>Optimization of **VI-PC<sub>OA</sub>** failed to locate a desired intermediate.



**Table S3.** Optimized geometries (M062X, Cartesian coordinates in Å) and energies of reactants transition state and intermediates (in a.u.). Parenthesis value indicate single point energies obtained at M062X/6-311+G\*\*, LANL2DZ. Notation: E = total electronic energy, Tc = thermal correction at 298K to obtain the Gibbs free energy, Nimag = number of imaginary frequencies

|                                                                                                                                                                                                                                                                                                                                                                                                                                                                                                                                                                                                                              |                                                                                                                                                                                                                                                                                                                                                                                                                                                                                                                                                                                                                      |
|------------------------------------------------------------------------------------------------------------------------------------------------------------------------------------------------------------------------------------------------------------------------------------------------------------------------------------------------------------------------------------------------------------------------------------------------------------------------------------------------------------------------------------------------------------------------------------------------------------------------------|----------------------------------------------------------------------------------------------------------------------------------------------------------------------------------------------------------------------------------------------------------------------------------------------------------------------------------------------------------------------------------------------------------------------------------------------------------------------------------------------------------------------------------------------------------------------------------------------------------------------|
| ArI<br>E = -242.9333067 (-242.9369025)<br>Nimag = 0<br>Tc = 0.058750                                                                                                                                                                                                                                                                                                                                                                                                                                                                                                                                                         | CuI<br>E = -1651.7452036 (-1651.8238898)<br>Nimag = 0<br>Tc = -0.025146                                                                                                                                                                                                                                                                                                                                                                                                                                                                                                                                              |
| C                    -2.92328034    -0.87301586<br>0.00000000 C                    -1.52812034    -<br>0.87301586    0.00000000 C                    -<br>0.83058234    0.33473514    0.00000000 C<br>-1.52823634    1.54324414    -0.00119900 C<br>-2.92306134    1.54316614    -0.00167800 C<br>-3.62066234    0.33496014    -0.00068200 H<br>-3.47303934    -1.82533286    0.00045000 H<br>0.26909766    0.33481514    0.00063400 H<br>-0.97803634    2.49538714    -0.00125800 H<br>-3.47318334    2.49544714    -0.00263100 H<br>-4.72026634    0.33514314    -0.00086200 I<br>-0.47873078    -2.69201977    0.00251124 | Cu                    0.00000000    0.00000000    -<br>1.64355900 I                    0.00000000<br>0.00000000    0.89930600                                                                                                                                                                                                                                                                                                                                                                                                                                                                                        |
| t-BuOH<br>E = -233.6314384 (-233.636819)<br>Nimag = 0<br>Tc = 0.107023                                                                                                                                                                                                                                                                                                                                                                                                                                                                                                                                                       | KO <sup>t</sup> Bu<br>E = -833.0001613 (-833.0113823)<br>Nimag = 0<br>Tc = 0.090052                                                                                                                                                                                                                                                                                                                                                                                                                                                                                                                                  |
| 8   -0.056170   -0.000213   1.446198<br>6   0.006649   -0.000005   0.014711<br>6   -0.676914   -1.254404   -0.525190<br>1   -1.735942   -1.259658   -0.250331<br>1   -0.608589   -1.299621   -1.614657<br>1   -0.206294   -2.146151   -0.105995<br>6   1.491690   -0.005185   -0.320202<br>1   1.642032   -0.004118   -1.401437<br>1   1.973137   0.879235   0.102505<br>1   1.966393   -0.894524   0.099828<br>6   -0.667920   1.259704   -0.524213<br>1   -0.191068   2.147618   -0.103913<br>1   -0.598947   1.305567   -1.613629<br>1   -1.726890   1.272027   -0.249456<br>1   -0.985506   0.000671   1.696871          | 19   2.626532   -0.000466   0.000370<br>8   0.272278   -0.000165   0.000135<br>6   -1.094164   0.000009   0.000001<br>6   -1.648168   -0.377540   1.392870<br>1   -1.278354   0.337824   2.133817<br>1   -2.743306   -0.386660   1.433086<br>1   -1.280885   -1.370721   1.669639<br>6   -1.646495   -1.017959   -1.024015<br>1   -2.741690   -1.048189   -1.053752<br>1   -1.277915   -0.761823   -2.022020<br>1   -1.276769   -2.017031   -0.773345<br>6   -1.644194   1.396415   -0.369813<br>1   -1.271058   1.679915   -1.358855<br>1   -2.739151   1.440218   -0.383578<br>1   -1.275093   2.131090   0.352631 |
| PhSH<br>E = -630.3845473 (-630.3879579)<br>Nimag = 0<br>Tc = 0.069916                                                                                                                                                                                                                                                                                                                                                                                                                                                                                                                                                        | KI<br>E = -611.3950276 (-611.3950799)<br>Nimag = 0<br>Tc = -0.025664                                                                                                                                                                                                                                                                                                                                                                                                                                                                                                                                                 |
| 6   0.200079   -1.206317   0.002854<br>6   -0.503679   -0.001149   0.001008<br>6   0.191722   1.207885   -0.001658                                                                                                                                                                                                                                                                                                                                                                                                                                                                                                           | 53   0.000000   0.000000   0.896875<br>19   0.000000   0.000000   -2.501809                                                                                                                                                                                                                                                                                                                                                                                                                                                                                                                                          |

|                                                                                                                                                                                                                                                                                                                                                                                                                                               |                                                                                                                                                                                                                                                                                                                                                                                                                                                       |
|-----------------------------------------------------------------------------------------------------------------------------------------------------------------------------------------------------------------------------------------------------------------------------------------------------------------------------------------------------------------------------------------------------------------------------------------------|-------------------------------------------------------------------------------------------------------------------------------------------------------------------------------------------------------------------------------------------------------------------------------------------------------------------------------------------------------------------------------------------------------------------------------------------------------|
| 6 1.582580 1.204998 -0.001192<br>6 2.287733 0.005890 -0.000479<br>6 1.589784 -1.198102 0.001108<br>1 -0.337382 -2.147833 0.006943<br>1 -0.346186 2.148621 -0.004578<br>1 2.114498 2.148996 -0.002498<br>1 3.370523 0.009460 -0.000835<br>1 2.126791 -2.139132 0.002611<br>16 -2.282156 -0.083551 -0.004694<br>1 -2.503053 1.237469 0.063613                                                                                                   |                                                                                                                                                                                                                                                                                                                                                                                                                                                       |
| PhSK<br>E = -1229.805225 (-1229.8083453)<br>Nimag = 0<br>Tc = 0.053905                                                                                                                                                                                                                                                                                                                                                                        |                                                                                                                                                                                                                                                                                                                                                                                                                                                       |
| 6 0.743847 -0.443805 1.201357<br>6 0.096391 -0.797417 0.002605<br>6 0.748006 -0.457397 -1.197838<br>6 1.975039 0.198035 -1.198515<br>6 2.597520 0.539833 -0.000616<br>6 1.970864 0.211700 1.198919<br>1 0.269450 -0.694299 2.143940<br>1 0.276871 -0.718761 -2.139100<br>1 2.447233 0.441866 -2.143958<br>1 3.552163 1.051522 -0.001890<br>1 2.439679 0.466520 2.143140<br>16 -1.493619 -1.576274 0.004306<br>19 -1.783026 1.535150 -0.005605 |                                                                                                                                                                                                                                                                                                                                                                                                                                                       |
| H <sub>2</sub> O<br>E = -76.4194597 (-76.4285158)<br>Nimag = 0<br>Tc = 0.003938                                                                                                                                                                                                                                                                                                                                                               | Cu(SPh)<br>E = -2270.1792007 (-2270.2445866)<br>Nimag = 0<br>Tc = 0.055958                                                                                                                                                                                                                                                                                                                                                                            |
| 8 0.000000 0.000000 0.118797<br>1 0.000000 0.754674 -0.475188<br>1 0.000000 -0.754674 -0.475188                                                                                                                                                                                                                                                                                                                                               | 29 2.272764 0.469168 -0.063742<br>16 0.935868 -1.282702 0.105194<br>6 -0.641266 -0.466424 0.045622<br>6 -0.779953 0.926260 0.115194<br>6 -1.806519 -1.236628 -0.063953<br>6 -2.035181 1.522164 0.076039<br>1 0.100156 1.553618 0.212107<br>6 -3.060009 -0.638243 -0.104129<br>1 -1.719311 -2.315881 -0.118742<br>6 -3.184980 0.746835 -0.035809<br>1 -2.111628 2.602158 0.132957<br>1 -3.944122 -1.260028 -0.189932<br>1 -4.161699 1.213697 -0.068753 |
| [Cu(SPh) <sub>2</sub> ]<br>E = -3500.0549097 (-3500.1125278)<br>Nimag = 0<br>Tc = 0.134211                                                                                                                                                                                                                                                                                                                                                    | [Cu(SPh <sub>2</sub> )( <sup>t</sup> BuO)]<br>E = -3103.2623226 (-3103.3188491)<br>Nimag = 0<br>Tc = 0.170090                                                                                                                                                                                                                                                                                                                                         |

|                                                                                                                         |           |           |           |                                                                                                            |           |           |           |
|-------------------------------------------------------------------------------------------------------------------------|-----------|-----------|-----------|------------------------------------------------------------------------------------------------------------|-----------|-----------|-----------|
| 29                                                                                                                      | 0.770967  | 1.035450  | -0.626539 | 6                                                                                                          | 3.356043  | 0.082585  | -0.383438 |
| 16                                                                                                                      | 2.491102  | -0.368956 | -0.970409 | 6                                                                                                          | 1.989104  | -0.139934 | -0.599493 |
| 6                                                                                                                       | 1.314996  | -1.534601 | -0.291314 | 6                                                                                                          | 1.443433  | -1.359426 | -0.166287 |
| 6                                                                                                                       | 0.844188  | -1.417545 | 1.024465  | 6                                                                                                          | 2.238997  | -2.310257 | 0.461474  |
| 6                                                                                                                       | 0.812785  | -2.572431 | -1.083708 | 6                                                                                                          | 3.593997  | -2.073673 | 0.678168  |
| 6                                                                                                                       | -0.102649 | -2.304711 | 1.523905  | 6                                                                                                          | 4.147230  | -0.871095 | 0.249481  |
| 1                                                                                                                       | 1.224606  | -0.626504 | 1.660764  | 1                                                                                                          | 3.799234  | 1.011985  | -0.725299 |
| 6                                                                                                                       | -0.139345 | -3.454952 | -0.582964 | 1                                                                                                          | 0.390643  | -1.562352 | -0.335743 |
| 1                                                                                                                       | 1.165707  | -2.674060 | -2.103340 | 1                                                                                                          | 1.792278  | -3.244536 | 0.782237  |
| 6                                                                                                                       | -0.604376 | -3.325842 | 0.722698  | 1                                                                                                          | 4.209368  | -2.817784 | 1.168614  |
| 1                                                                                                                       | -0.456999 | -2.189108 | 2.541844  | 1                                                                                                          | 5.201861  | -0.672029 | 0.402391  |
| 1                                                                                                                       | -0.518737 | -4.246339 | -1.219512 | 16                                                                                                         | 1.011950  | 1.123783  | -1.389736 |
| 1                                                                                                                       | -1.349637 | -4.010383 | 1.109575  | 29                                                                                                         | -0.980316 | 0.216851  | -1.097474 |
| 16                                                                                                                      | -0.922252 | 2.424602  | -0.279997 | 8                                                                                                          | -2.576321 | -0.704531 | -0.793783 |
| 6                                                                                                                       | -2.273133 | 1.292210  | -0.040690 | 6                                                                                                          | -3.144704 | -0.447714 | 0.448272  |
| 6                                                                                                                       | -2.180654 | -0.079476 | -0.314975 | 6                                                                                                          | -2.171259 | -0.831294 | 1.578400  |
| 6                                                                                                                       | -3.499766 | 1.786190  | 0.425037  | 1                                                                                                          | -1.878901 | -1.878906 | 1.464145  |
| 6                                                                                                                       | -3.273369 | -0.919508 | -0.126321 | 1                                                                                                          | -1.262822 | -0.222948 | 1.499701  |
| 1                                                                                                                       | -1.250769 | -0.503632 | -0.679855 | 1                                                                                                          | -2.599352 | -0.688786 | 2.575979  |
| 6                                                                                                                       | -4.589279 | 0.944341  | 0.612082  | 6                                                                                                          | -3.496790 | 1.044344  | 0.584238  |
| 1                                                                                                                       | -3.591288 | 2.844727  | 0.641590  | 1                                                                                                          | -4.130759 | 1.341561  | -0.255266 |
| 6                                                                                                                       | -4.484876 | -0.417365 | 0.338384  | 1                                                                                                          | -4.013892 | 1.276781  | 1.520885  |
| 1                                                                                                                       | -3.166321 | -1.976615 | -0.343676 | 1                                                                                                          | -2.579059 | 1.640689  | 0.536638  |
| 1                                                                                                                       | -5.524601 | 1.355819  | 0.975335  | 6                                                                                                          | -4.424210 | -1.283696 | 0.582096  |
| 1                                                                                                                       | -5.333014 | -1.075066 | 0.484901  | 1                                                                                                          | -4.919627 | -1.140980 | 1.547294  |
| 19                                                                                                                      | 4.231278  | 1.168679  | 1.150995  | 1                                                                                                          | -5.121144 | -1.009024 | -0.214088 |
|                                                                                                                         |           |           |           | 1                                                                                                          | -4.176384 | -2.342153 | 0.466803  |
|                                                                                                                         |           |           |           | 19                                                                                                         | 1.418212  | 2.148236  | 1.546371  |
| Cu <sub>2</sub> [μ-( <sup>t</sup> BuO) <sub>2</sub> ]<br>E = -3746.8553261 (-3746.950334)<br>Nimag = 0<br>Tc = 0.207299 |           |           |           | Cu <sub>2</sub> [μ-(SPh) <sub>2</sub> ]<br>E = -4540.4621171 (-4540.5608186)<br>Nimag = 0<br>Tc = 0.137624 |           |           |           |
| 29                                                                                                                      | -0.141697 | -1.242422 | -0.276975 | 29                                                                                                         | 0.188304  | 1.124583  | -1.108069 |
| 6                                                                                                                       | -2.493861 | 0.071518  | 0.140500  | 16                                                                                                         | 2.465359  | -1.269005 | 1.336990  |
| 29                                                                                                                      | 0.141686  | 1.242474  | -0.276953 | 6                                                                                                          | 1.723196  | 0.338598  | 1.133127  |
| 6                                                                                                                       | 2.493871  | -0.071546 | 0.140498  | 6                                                                                                          | 2.252734  | 1.269979  | 0.221667  |
| 8                                                                                                                       | 1.549968  | -0.490871 | -0.797424 | 6                                                                                                          | 0.562961  | 0.699715  | 1.840880  |
| 8                                                                                                                       | -1.549953 | 0.490875  | -0.797406 | 6                                                                                                          | 1.571718  | 2.459366  | -0.076475 |
| 6                                                                                                                       | 2.392468  | 1.463255  | 0.287859  | 1                                                                                                          | 3.169217  | 1.030943  | -0.302689 |
| 1                                                                                                                       | 3.183404  | 1.894893  | 0.905798  | 6                                                                                                          | -0.137859 | 1.856037  | 1.522164  |
| 1                                                                                                                       | 2.444085  | 1.926795  | -0.701602 | 1                                                                                                          | 0.161513  | 0.012824  | 2.576109  |
| 1                                                                                                                       | 1.464584  | 1.769870  | 0.833435  | 6                                                                                                          | 0.342093  | 2.738240  | 0.544569  |
| 6                                                                                                                       | 3.897130  | -0.423622 | -0.360280 | 1                                                                                                          | 2.003236  | 3.165110  | -0.775868 |
| 1                                                                                                                       | 4.680459  | -0.098548 | 0.330067  | 1                                                                                                          | -1.066213 | 2.076429  | 2.035179  |
| 1                                                                                                                       | 3.969996  | -1.506230 | -0.488553 | 1                                                                                                          | -0.196945 | 3.645321  | 0.306025  |
| 1                                                                                                                       | 4.066542  | 0.046518  | -1.332202 | 16                                                                                                         | -0.495612 | -0.921311 | -1.913658 |
| 6                                                                                                                       | 2.246759  | -0.743177 | 1.495904  | 29                                                                                                         | 1.079345  | -1.578656 | -0.416958 |
| 1                                                                                                                       | 2.995281  | -0.479793 | 2.248554  | 6                                                                                                          | -1.704367 | -0.667423 | -0.605511 |
| 1                                                                                                                       | 1.262218  | -0.452250 | 1.876460  | 6                                                                                                          | -2.573344 | 0.425778  | -0.671358 |

|                                                                                              |           |           |           |                                                                                                                         |           |           |           |
|----------------------------------------------------------------------------------------------|-----------|-----------|-----------|-------------------------------------------------------------------------------------------------------------------------|-----------|-----------|-----------|
| 1                                                                                            | 2.246830  | -1.826778 | 1.355495  | 6                                                                                                                       | -1.804370 | -1.549983 | 0.471903  |
| 6                                                                                            | -3.897108 | 0.423762  | -0.360196 | 6                                                                                                                       | -3.498025 | 0.652052  | 0.341269  |
| 1                                                                                            | -4.680445 | 0.098659  | 0.330128  | 1                                                                                                                       | -2.529883 | 1.092921  | -1.525708 |
| 1                                                                                            | -3.969897 | 1.506391  | -0.488330 | 6                                                                                                                       | -2.730025 | -1.318329 | 1.483236  |
| 1                                                                                            | -4.066568 | -0.046245 | -1.332173 | 1                                                                                                                       | -1.170192 | -2.428752 | 0.511178  |
| 6                                                                                            | -2.392571 | -1.463309 | 0.287676  | 6                                                                                                                       | -3.573016 | -0.212351 | 1.429587  |
| 1                                                                                            | -2.444277 | -1.926745 | -0.701826 | 1                                                                                                                       | -4.159003 | 1.508597  | 0.279041  |
| 1                                                                                            | -1.464680 | -1.770098 | 0.833151  | 1                                                                                                                       | -2.790311 | -2.007685 | 2.317191  |
| 1                                                                                            | -3.183502 | -1.894945 | 0.905624  | 1                                                                                                                       | -4.289372 | -0.032603 | 2.221665  |
| 6                                                                                            | -2.246662 | 0.742951  | 1.495988  |                                                                                                                         |           |           |           |
| 1                                                                                            | -1.262138 | 0.451891  | 1.876485  |                                                                                                                         |           |           |           |
| 1                                                                                            | -2.246667 | 1.826574  | 1.355743  |                                                                                                                         |           |           |           |
| 1                                                                                            | -2.995188 | 0.479507  | 2.248614  |                                                                                                                         |           |           |           |
| <b>I-RC<sub>oA</sub></b><br>E = -2513.1684757 (-2513.2158003)<br>Nimag = 0<br>Tc = 0.136752  |           |           |           | <b>I-TS<sub>oA</sub></b><br>E = -2513.1226565 (-2513.1681468)<br>Nimag = 1 (-133.40 cm <sup>-1</sup> )<br>Tc = 0.136007 |           |           |           |
| 29                                                                                           | -1.266650 | 1.586808  | 0.554935  | 29                                                                                                                      | 0.070694  | -0.536362 | -0.000118 |
| 53                                                                                           | 2.648685  | -0.360391 | 0.279381  | 53                                                                                                                      | -0.090019 | 1.953891  | 0.000054  |
| 6                                                                                            | 1.075188  | 0.728872  | -0.619172 | 6                                                                                                                       | -1.844444 | -0.219385 | 0.000012  |
| 6                                                                                            | 0.868021  | 2.057202  | -0.234295 | 6                                                                                                                       | -2.489194 | -0.363996 | 1.215730  |
| 6                                                                                            | -0.167949 | 2.790520  | -0.836055 | 6                                                                                                                       | -3.845657 | -0.686550 | 1.205346  |
| 6                                                                                            | -1.003929 | 2.170054  | -1.778820 | 6                                                                                                                       | -4.520602 | -0.849796 | 0.000050  |
| 6                                                                                            | -0.770065 | 0.846997  | -2.150285 | 6                                                                                                                       | -3.845787 | -0.686145 | -1.205265 |
| 6                                                                                            | 0.282156  | 0.125638  | -1.588181 | 6                                                                                                                       | -2.489327 | -0.363585 | -1.215683 |
| 1                                                                                            | 1.510467  | 2.526241  | 0.498665  | 1                                                                                                                       | -1.967262 | -0.221705 | 2.153616  |
| 1                                                                                            | -0.301169 | 3.835129  | -0.584489 | 1                                                                                                                       | -4.365991 | -0.808071 | 2.147873  |
| 1                                                                                            | -1.813355 | 2.729358  | -2.229230 | 1                                                                                                                       | -5.576154 | -1.092275 | 0.000068  |
| 1                                                                                            | -1.408231 | 0.369385  | -2.882825 | 1                                                                                                                       | -4.366227 | -0.807339 | -2.147777 |
| 1                                                                                            | 0.447045  | -0.905418 | -1.873989 | 1                                                                                                                       | -1.967497 | -0.220962 | -2.153574 |
| 16                                                                                           | -2.494414 | 0.192249  | 1.774704  | 16                                                                                                                      | 0.635863  | -2.730828 | -0.000101 |
| 6                                                                                            | -1.977314 | -1.125390 | 0.674754  | 6                                                                                                                       | 1.993180  | -1.570508 | -0.000034 |
| 6                                                                                            | -2.724577 | -1.447757 | -0.464142 | 6                                                                                                                       | 2.514705  | -1.065950 | -1.210816 |
| 6                                                                                            | -0.833558 | -1.880735 | 0.952652  | 6                                                                                                                       | 2.514694  | -1.066068 | 1.210801  |
| 6                                                                                            | -2.319838 | -2.469952 | -1.315958 | 6                                                                                                                       | 3.505809  | -0.095153 | -1.205615 |
| 1                                                                                            | -3.618231 | -0.876159 | -0.688755 | 1                                                                                                                       | 2.124137  | -1.447850 | -2.146845 |
| 6                                                                                            | -0.429137 | -2.903223 | 0.100615  | 6                                                                                                                       | 3.505807  | -0.095285 | 1.205701  |
| 1                                                                                            | -0.246200 | -1.645697 | 1.833086  | 1                                                                                                                       | 2.124098  | -1.448033 | 2.146792  |
| 6                                                                                            | -1.168099 | -3.203430 | -1.040432 | 6                                                                                                                       | 4.000171  | 0.397651  | 0.000069  |
| 1                                                                                            | -2.910084 | -2.696149 | -2.197038 | 1                                                                                                                       | 3.888372  | 0.283168  | -2.145820 |
| 1                                                                                            | 0.470636  | -3.463157 | 0.329780  | 1                                                                                                                       | 3.888355  | 0.282951  | 2.145945  |
| 1                                                                                            | -0.853096 | -3.999018 | -1.704871 | 1                                                                                                                       | 4.769092  | 1.160274  | 0.000115  |
| <b>I-PC<sub>oA</sub></b><br>E = -2513.2035824 (-2513.25276623)<br>Nimag = 0<br>Tc = 0.138196 |           |           |           |                                                                                                                         |           |           |           |
| 29                                                                                           | 0.185933  | 0.000006  | -0.000017 |                                                                                                                         |           |           |           |
| 53                                                                                           | 2.839636  | -0.000002 | 0.000001  |                                                                                                                         |           |           |           |
| 6                                                                                            | -2.303854 | 1.311604  | -0.142922 |                                                                                                                         |           |           |           |

|                                  |           |           |           |                          |                               |
|----------------------------------|-----------|-----------|-----------|--------------------------|-------------------------------|
| 6                                | -2.249823 | 2.347717  | 0.775971  |                          |                               |
| 6                                | -1.196683 | 3.267607  | 0.716600  |                          |                               |
| 6                                | -0.193336 | 3.130040  | -0.228481 |                          |                               |
| 6                                | -0.261704 | 2.099254  | -1.175238 |                          |                               |
| 6                                | -1.343981 | 1.220226  | -1.166771 |                          |                               |
| 1                                | -2.995922 | 2.417664  | 1.557978  |                          |                               |
| 1                                | -1.151350 | 4.071118  | 1.441382  |                          |                               |
| 1                                | 0.642419  | 3.817830  | -0.243214 |                          |                               |
| 1                                | 0.479036  | 2.027260  | -1.961755 |                          |                               |
| 1                                | -1.465434 | 0.484871  | -1.955687 |                          |                               |
| 16                               | -3.519910 | -0.000019 | 0.000010  |                          |                               |
| 6                                | -2.303802 | -1.311594 | 0.142943  |                          |                               |
| 6                                | -2.249840 | -2.347729 | -0.775924 |                          |                               |
| 6                                | -1.343904 | -1.220177 | 1.166739  |                          |                               |
| 6                                | -1.196721 | -3.267632 | -0.716558 |                          |                               |
| 1                                | -2.995989 | -2.417700 | -1.557880 |                          |                               |
| 6                                | -0.261641 | -2.099233 | 1.175204  |                          |                               |
| 1                                | -1.465358 | -0.484839 | 1.955672  |                          |                               |
| 6                                | -0.193325 | -3.130040 | 0.228475  |                          |                               |
| 1                                | -1.151419 | -4.071167 | -1.441314 |                          |                               |
| 1                                | 0.479128  | -2.027221 | 1.961689  |                          |                               |
| 1                                | 0.642411  | -3.817855 | 0.243190  |                          |                               |
| <b>I-TS<sub>RE</sub></b>         |           |           |           | <b>I-PC<sub>RE</sub></b> |                               |
| E = -3131.5691543 (-3131.605537) |           |           |           | E = -3131.6378498 ()     |                               |
| Nimag = 1(-80.92)                |           |           |           | Nimag = 0                |                               |
| Tc = 0.224629                    |           |           |           | Tc = 0.223290            |                               |
| 29                               | -0.579829 | 0.379288  | -0.107093 | 29                       | -0.655853 -0.336463 -0.504926 |
| 6                                | -2.441413 | -0.115293 | -0.068994 | 6                        | -2.562466 -0.014685 0.639632  |
| 6                                | -3.258047 | 0.448993  | -1.033820 | 6                        | -2.320742 -1.113044 1.478165  |
| 6                                | -4.638248 | 0.274172  | -0.920158 | 6                        | -2.502253 -2.408136 0.998265  |
| 6                                | -5.169689 | -0.451253 | 0.139679  | 6                        | -2.906875 -2.621718 -0.316351 |
| 6                                | -4.323860 | -1.007481 | 1.094701  | 6                        | -3.107819 -1.538735 -1.165866 |
| 6                                | -2.942916 | -0.841690 | 0.997452  | 6                        | -2.957432 -0.231987 -0.692880 |
| 1                                | -2.848876 | 1.008998  | -1.866278 | 1                        | -2.018120 -0.942624 2.503990  |
| 1                                | -5.290836 | 0.709314  | -1.667940 | 1                        | -2.328807 -3.248431 1.658718  |
| 1                                | -6.241195 | -0.587149 | 0.220481  | 1                        | -3.045925 -3.629919 -0.684807 |
| 1                                | -4.731902 | -1.571515 | 1.925235  | 1                        | -3.417448 -1.697760 -2.191060 |
| 1                                | -2.290681 | -1.276803 | 1.744743  | 1                        | -3.179195 0.614550 -1.331907  |
| 16                               | -0.530092 | 2.054117  | 1.362824  | 16                       | 0.984621 -1.330355 -1.681540  |
| 6                                | 1.055131  | 1.877881  | 0.573447  | 6                        | 2.273039 -1.118847 -0.475371  |
| 6                                | 2.190360  | 1.437134  | 1.283330  | 6                        | 3.534769 -0.661868 -0.871035  |
| 6                                | 1.184251  | 2.148114  | -0.802230 | 6                        | 2.068682 -1.400343 0.882119   |
| 6                                | 3.406728  | 1.305034  | 0.641315  | 6                        | 4.547808 -0.461041 0.061429   |
| 1                                | 2.095327  | 1.213220  | 2.338990  | 1                        | 3.710122 -0.442721 -1.918127  |
| 6                                | 2.411702  | 1.986921  | -1.444872 | 6                        | 3.081504 -1.199957 1.813085   |
| 1                                | 0.337871  | 2.550409  | -1.349732 | 1                        | 1.107122 -1.780482 1.212209   |
| 6                                | 3.522231  | 1.574969  | -0.726646 | 6                        | 4.326473 -0.720947 1.411230   |
| 1                                | 4.273638  | 0.974425  | 1.201084  | 1                        | 5.513001 -0.095381 -0.270647  |
| 1                                | 2.491775  | 2.200950  | -2.503764 | 1                        | 2.895136 -1.417863 2.858815   |

|                                   |           |           |           |                                      |           |           |           |
|-----------------------------------|-----------|-----------|-----------|--------------------------------------|-----------|-----------|-----------|
| 1                                 | 4.478350  | 1.455428  | -1.221908 | 1                                    | 5.112786  | -0.560115 | 2.138694  |
| 16                                | -0.416894 | -1.320030 | -1.480070 | 16                                   | -2.424229 | 1.660870  | 1.272261  |
| 6                                 | 1.072800  | -1.650603 | -0.552745 | 6                                    | -0.859108 | 2.067758  | 0.484860  |
| 6                                 | 2.327425  | -1.496746 | -1.150477 | 6                                    | 0.329438  | 1.532657  | 0.995752  |
| 6                                 | 0.991206  | -2.126542 | 0.763708  | 6                                    | -0.829767 | 2.922914  | -0.616996 |
| 6                                 | 3.479358  | -1.830934 | -0.446637 | 6                                    | 1.545492  | 1.866101  | 0.404469  |
| 1                                 | 2.393015  | -1.119619 | -2.163729 | 1                                    | 0.305030  | 0.906011  | 1.880821  |
| 6                                 | 2.148420  | -2.418400 | 1.472946  | 6                                    | 0.390240  | 3.239927  | -1.206501 |
| 1                                 | 0.019330  | -2.285041 | 1.217703  | 1                                    | -1.754699 | 3.331348  | -1.005506 |
| 6                                 | 3.395032  | -2.280626 | 0.866519  | 6                                    | 1.574828  | 2.714107  | -0.697503 |
| 1                                 | 4.446969  | -1.718672 | -0.922000 | 1                                    | 2.465074  | 1.456292  | 0.806894  |
| 1                                 | 2.075396  | -2.775080 | 2.493374  | 1                                    | 0.412566  | 3.898419  | -2.066285 |
| 1                                 | 4.295806  | -2.525504 | 1.416269  | 1                                    | 2.521957  | 2.964904  | -1.159516 |
| <b>II-RC<sub>oA</sub></b>         |           |           |           | <b>II-TS<sub>oA</sub></b>            |           |           |           |
| E = -3743.0060532 (-3743.0596345) |           |           |           | E = -3742.9759986 (-3743.0223605)    |           |           |           |
| Nimag = 0                         |           |           |           | Nimag = 1(-104.96 cm <sup>-1</sup> ) |           |           |           |
| Tc = 0.213778                     |           |           |           | Tc = 0.217936                        |           |           |           |
| 29                                | 0.023976  | 0.601446  | -0.189906 | 29                                   | 0.568472  | -0.134914 | -0.683658 |
| 53                                | -1.191241 | -3.046755 | -0.868161 | 53                                   | 1.837498  | 2.068312  | -1.244786 |
| 6                                 | -0.094994 | -1.869065 | 0.509877  | 6                                    | -0.464893 | 1.380670  | -0.010253 |
| 6                                 | -0.773347 | -0.886994 | 1.243300  | 6                                    | -0.303134 | 1.514745  | 1.360911  |
| 6                                 | -0.025698 | -0.090186 | 2.124487  | 6                                    | -1.314041 | 2.135118  | 2.095849  |
| 6                                 | 1.331635  | -0.340271 | 2.332805  | 6                                    | -2.441843 | 2.634226  | 1.455851  |
| 6                                 | 1.967652  | -1.358274 | 1.635566  | 6                                    | -2.570773 | 2.505859  | 0.075424  |
| 6                                 | 1.260919  | -2.112798 | 0.700630  | 6                                    | -1.578278 | 1.877761  | -0.669290 |
| 1                                 | -1.845501 | -0.757747 | 1.158792  | 1                                    | 0.594217  | 1.165611  | 1.860581  |
| 1                                 | -0.536639 | 0.679988  | 2.690008  | 1                                    | -1.199913 | 2.232222  | 3.169790  |
| 1                                 | 1.891168  | 0.270432  | 3.030041  | 1                                    | -3.219798 | 3.124999  | 2.028498  |
| 1                                 | 3.026381  | -1.540672 | 1.779821  | 1                                    | -3.452711 | 2.882546  | -0.429279 |
| 1                                 | 1.763342  | -2.882100 | 0.128623  | 1                                    | -1.681770 | 1.772268  | -1.742622 |
| 16                                | 1.943733  | 1.590430  | -1.006207 | 16                                   | -1.172984 | -1.631639 | -1.072214 |
| 6                                 | 3.366396  | 0.853228  | -0.242916 | 6                                    | -2.692691 | -0.986405 | -0.436432 |
| 6                                 | 3.893908  | 1.358132  | 0.950142  | 6                                    | -2.878112 | -0.827846 | 0.940633  |
| 6                                 | 3.977140  | -0.265897 | -0.819171 | 6                                    | -3.727295 | -0.621783 | -1.304470 |
| 6                                 | 4.990363  | 0.752660  | 1.556153  | 6                                    | -4.069873 | -0.313317 | 1.435852  |
| 1                                 | 3.426252  | 2.222127  | 1.408879  | 1                                    | -2.073770 | -1.097026 | 1.616851  |
| 6                                 | 5.074187  | -0.869647 | -0.214100 | 6                                    | -4.922927 | -0.117147 | -0.804681 |
| 1                                 | 3.573257  | -0.668166 | -1.741377 | 1                                    | -3.582434 | -0.731585 | -2.373198 |
| 6                                 | 5.586239  | -0.366273 | 0.979637  | 6                                    | -5.097857 | 0.043125  | 0.567132  |
| 1                                 | 5.379392  | 1.157300  | 2.483996  | 1                                    | -4.193286 | -0.182696 | 2.505211  |
| 1                                 | 5.528567  | -1.738868 | -0.676271 | 1                                    | -5.716382 | 0.159258  | -1.489759 |
| 1                                 | 6.438847  | -0.838295 | 1.452807  | 1                                    | -6.026822 | 0.443668  | 0.955735  |
| 16                                | -1.880709 | 1.399004  | -1.438330 | 16                                   | 2.293869  | -1.793487 | -0.660257 |
| 6                                 | -2.888301 | 1.424802  | 0.022285  | 6                                    | 2.165586  | -1.280192 | 1.047093  |
| 6                                 | -2.512529 | 2.156182  | 1.158889  | 6                                    | 1.141687  | -1.756615 | 1.879821  |
| 6                                 | -4.070657 | 0.675615  | 0.085277  | 6                                    | 3.079705  | -0.360731 | 1.583417  |
| 6                                 | -3.285231 | 2.129219  | 2.315676  | 6                                    | 1.026011  | -1.315808 | 3.194388  |
| 1                                 | -1.605687 | 2.752520  | 1.129440  | 1                                    | 0.419246  | -2.460931 | 1.484155  |
| 6                                 | -4.839914 | 0.647199  | 1.244159  | 6                                    | 2.961490  | 0.078271  | 2.896669  |

|                                                                                             |           |           |           |                                                                                             |           |           |           |
|---------------------------------------------------------------------------------------------|-----------|-----------|-----------|---------------------------------------------------------------------------------------------|-----------|-----------|-----------|
| 1                                                                                           | -4.373603 | 0.101966  | -0.783474 | 1                                                                                           | 3.873707  | 0.017692  | 0.950537  |
| 6                                                                                           | -4.451798 | 1.370917  | 2.368785  | 6                                                                                           | 1.931664  | -0.392688 | 3.709351  |
| 1                                                                                           | -2.970592 | 2.702696  | 3.180839  | 1                                                                                           | 0.221835  | -1.694094 | 3.815281  |
| 1                                                                                           | -5.746783 | 0.053150  | 1.266905  | 1                                                                                           | 3.676464  | 0.793733  | 3.286782  |
| 1                                                                                           | -5.049975 | 1.346974  | 3.271530  | 1                                                                                           | 1.839153  | -0.045392 | 4.731187  |
| 19                                                                                          | 0.078833  | 3.899608  | -1.939846 | 19                                                                                          | 0.381498  | -4.340513 | -1.102844 |
| <b>II-PC<sub>oA</sub></b><br>E = -3742.9790908 (-3743.028367)<br>Nimag = 0<br>Tc = 0.215066 |           |           |           | <b>II-RC<sub>RE</sub></b><br>E = -4361.4220666 (-4361.465579)<br>Nimag = 0<br>Tc = 0.303084 |           |           |           |
| 29                                                                                          | 0.085985  | -0.008560 | 0.336998  | 29                                                                                          | 0.344852  | -0.447061 | -0.533123 |
| 53                                                                                          | 1.436822  | -2.277512 | 0.463230  | 6                                                                                           | -1.282243 | 0.563246  | -0.576185 |
| 6                                                                                           | -1.405087 | -1.033225 | -0.329829 | 6                                                                                           | -1.772289 | 0.939855  | -1.816928 |
| 6                                                                                           | -2.329898 | -1.597953 | 0.532953  | 6                                                                                           | -2.986281 | 1.624161  | -1.893098 |
| 6                                                                                           | -3.377446 | -2.351456 | 0.007060  | 6                                                                                           | -3.696725 | 1.919653  | -0.734927 |
| 6                                                                                           | -3.491961 | -2.528853 | -1.368781 | 6                                                                                           | -3.196532 | 1.527031  | 0.503661  |
| 6                                                                                           | -2.553728 | -1.955813 | -2.220618 | 6                                                                                           | -1.983269 | 0.847650  | 0.585325  |
| 6                                                                                           | -1.501140 | -1.201578 | -1.701548 | 1                                                                                           | -1.223876 | 0.716249  | -2.725996 |
| 1                                                                                           | -2.252877 | -1.455594 | 1.605392  | 1                                                                                           | -3.370189 | 1.924581  | -2.861859 |
| 1                                                                                           | -4.102922 | -2.796652 | 0.678650  | 1                                                                                           | -4.638692 | 2.452214  | -0.796250 |
| 1                                                                                           | -4.310424 | -3.110976 | -1.775238 | 1                                                                                           | -3.747116 | 1.750714  | 1.410844  |
| 1                                                                                           | -2.634238 | -2.090164 | -3.293500 | 1                                                                                           | -1.597396 | 0.550918  | 1.555398  |
| 1                                                                                           | -0.773069 | -0.761574 | -2.374454 | 16                                                                                          | 1.428284  | 1.500139  | -0.285398 |
| 16                                                                                          | 1.752311  | 1.487285  | 0.998399  | 6                                                                                           | 0.412643  | 2.830900  | 0.307604  |
| 6                                                                                           | 3.239711  | 0.947616  | 0.184313  | 6                                                                                           | -0.281102 | 3.661576  | -0.576252 |
| 6                                                                                           | 4.367173  | 0.614602  | 0.939931  | 6                                                                                           | 0.343042  | 3.088111  | 1.679493  |
| 6                                                                                           | 3.322808  | 0.879003  | -1.210476 | 6                                                                                           | -1.046408 | 4.715849  | -0.093053 |
| 6                                                                                           | 5.547126  | 0.220956  | 0.316629  | 1                                                                                           | -0.229681 | 3.464019  | -1.640090 |
| 1                                                                                           | 4.310143  | 0.655893  | 2.021440  | 6                                                                                           | -0.416625 | 4.149586  | 2.160268  |
| 6                                                                                           | 4.500982  | 0.479337  | -1.831518 | 1                                                                                           | 0.886709  | 2.448368  | 2.364971  |
| 1                                                                                           | 2.452516  | 1.127028  | -1.809376 | 6                                                                                           | -1.117840 | 4.963743  | 1.275907  |
| 6                                                                                           | 5.620330  | 0.150653  | -1.071248 | 1                                                                                           | -1.588487 | 5.347272  | -0.787749 |
| 1                                                                                           | 6.410252  | -0.037154 | 0.919710  | 1                                                                                           | -0.461817 | 4.338312  | 3.226612  |
| 1                                                                                           | 4.543841  | 0.426276  | -2.913423 | 1                                                                                           | -1.714571 | 5.787623  | 1.649005  |
| 1                                                                                           | 6.538219  | -0.159344 | -1.555988 | 16                                                                                          | -0.840734 | -2.395926 | -0.640751 |
| 16                                                                                          | -1.309074 | 1.747786  | 0.278736  | 6                                                                                           | -2.515463 | -2.176793 | -0.096693 |
| 6                                                                                           | -3.038832 | 1.367170  | 0.265183  | 6                                                                                           | -2.849854 | -2.333879 | 1.251277  |
| 6                                                                                           | -3.726562 | 1.245915  | 1.475508  | 6                                                                                           | -3.519896 | -1.858241 | -1.013635 |
| 6                                                                                           | -3.729759 | 1.209030  | -0.938388 | 6                                                                                           | -4.163629 | -2.163846 | 1.674724  |
| 6                                                                                           | -5.086492 | 0.957508  | 1.480860  | 1                                                                                           | -2.072486 | -2.577299 | 1.966899  |
| 1                                                                                           | -3.186650 | 1.368623  | 2.407065  | 6                                                                                           | -4.830774 | -1.684174 | -0.586937 |
| 6                                                                                           | -5.087801 | 0.914555  | -0.928124 | 1                                                                                           | -3.261760 | -1.732174 | -2.058107 |
| 1                                                                                           | -3.194653 | 1.301204  | -1.875658 | 6                                                                                           | -5.157579 | -1.833329 | 0.758422  |
| 6                                                                                           | -5.768557 | 0.784489  | 0.279808  | 1                                                                                           | -4.408743 | -2.285528 | 2.723604  |
| 1                                                                                           | -5.611416 | 0.861930  | 2.424109  | 1                                                                                           | -5.599164 | -1.427207 | -1.307158 |
| 1                                                                                           | -5.614554 | 0.782445  | -1.866024 | 1                                                                                           | -6.179901 | -1.696020 | 1.090097  |
| 1                                                                                           | -6.826917 | 0.552165  | 0.284467  | 16                                                                                          | 2.270512  | -1.758937 | -0.775407 |
| 19                                                                                          | 0.816349  | 4.101021  | -0.575038 | 6                                                                                           | 3.699334  | -0.786766 | -0.362119 |
|                                                                                             |           |           |           | 6                                                                                           | 4.237697  | -0.823250 | 0.928119  |

|                                                                                                                          |                                                                                             |           |           |           |    |           |           |           |
|--------------------------------------------------------------------------------------------------------------------------|---------------------------------------------------------------------------------------------|-----------|-----------|-----------|----|-----------|-----------|-----------|
|                                                                                                                          | 6                                                                                           | 4.324066  | 0.006584  | -1.328563 |    |           |           |           |
|                                                                                                                          | 6                                                                                           | 5.370502  | -0.080850 | 1.243639  |    |           |           |           |
|                                                                                                                          | 1                                                                                           | 3.758590  | -1.432902 | 1.686080  |    |           |           |           |
|                                                                                                                          | 6                                                                                           | 5.457011  | 0.749160  | -1.010900 |    |           |           |           |
|                                                                                                                          | 1                                                                                           | 3.910328  | 0.042417  | -2.329714 |    |           |           |           |
|                                                                                                                          | 6                                                                                           | 5.985430  | 0.708945  | 0.275733  |    |           |           |           |
|                                                                                                                          | 1                                                                                           | 5.773152  | -0.120130 | 2.249325  |    |           |           |           |
|                                                                                                                          | 1                                                                                           | 5.926083  | 1.361220  | -1.772723 |    |           |           |           |
|                                                                                                                          | 1                                                                                           | 6.867574  | 1.287424  | 0.522946  |    |           |           |           |
|                                                                                                                          | 19                                                                                          | 1.219075  | -4.004696 | 1.220529  |    |           |           |           |
| <b>II-TS<sub>RE</sub></b><br>E = -4361.4187697 (-4361.4628999)<br>Nimag = 1 (-153.67 cm <sup>-1</sup> )<br>Tc = 0.302704 | <b>II-PC<sub>RE</sub></b><br>E = -4361.476006 (-4361.5287855)<br>Nimag = 0<br>Tc = 0.303128 |           |           |           |    |           |           |           |
| 29                                                                                                                       | 0.335437                                                                                    | -0.628443 | -0.562504 |           | 29 | 1.167654  | 0.842436  | -0.984748 |
| 6                                                                                                                        | -1.116151                                                                                   | 0.676199  | -0.640269 |           | 6  | -1.731724 | 1.504285  | -1.824422 |
| 6                                                                                                                        | -1.622243                                                                                   | 0.974251  | -1.897824 |           | 6  | -1.231240 | 2.675260  | -2.397458 |
| 6                                                                                                                        | -2.918902                                                                                   | 1.477459  | -2.006317 |           | 6  | -0.063643 | 2.631815  | -3.147081 |
| 6                                                                                                                        | -3.685603                                                                                   | 1.690782  | -0.866632 |           | 6  | 0.591663  | 1.421522  | -3.378378 |
| 6                                                                                                                        | -3.167111                                                                                   | 1.377231  | 0.387571  |           | 6  | 0.048765  | 0.236716  | -2.870187 |
| 6                                                                                                                        | -1.879364                                                                                   | 0.868045  | 0.505314  |           | 6  | -1.102202 | 0.283459  | -2.074467 |
| 1                                                                                                                        | -1.012164                                                                                   | 0.847144  | -2.784935 |           | 1  | -1.723565 | 3.623188  | -2.213477 |
| 1                                                                                                                        | -3.317039                                                                                   | 1.714416  | -2.986497 |           | 1  | 0.338749  | 3.548931  | -3.559895 |
| 1                                                                                                                        | -4.686633                                                                                   | 2.096442  | -0.954083 |           | 1  | 1.494570  | 1.391333  | -3.975003 |
| 1                                                                                                                        | -3.767687                                                                                   | 1.520020  | 1.278556  |           | 1  | 0.501058  | -0.720753 | -3.099418 |
| 1                                                                                                                        | -1.472571                                                                                   | 0.642159  | 1.485379  |           | 1  | -1.510090 | -0.636697 | -1.674959 |
| 16                                                                                                                       | 1.133931                                                                                    | 1.450883  | -0.461726 |           | 16 | -3.170374 | 1.667653  | -0.788229 |
| 6                                                                                                                        | 0.330396                                                                                    | 2.868377  | 0.256504  |           | 6  | -3.323571 | 0.032486  | -0.087285 |
| 6                                                                                                                        | -0.338613                                                                                   | 3.786011  | -0.555187 |           | 6  | -4.242420 | -0.865290 | -0.628136 |
| 6                                                                                                                        | 0.412421                                                                                    | 3.086108  | 1.631591  |           | 6  | -2.543291 | -0.330484 | 1.011946  |
| 6                                                                                                                        | -0.939097                                                                                   | 4.903149  | 0.011431  |           | 6  | -4.383257 | -2.130984 | -0.065619 |
| 1                                                                                                                        | -0.397541                                                                                   | 3.608545  | -1.622345 |           | 1  | -4.839150 | -0.573095 | -1.483879 |
| 6                                                                                                                        | -0.189360                                                                                   | 4.207979  | 2.193766  |           | 6  | -2.683393 | -1.600296 | 1.562207  |
| 1                                                                                                                        | 0.940760                                                                                    | 2.373530  | 2.253645  |           | 1  | -1.834625 | 0.374893  | 1.432492  |
| 6                                                                                                                        | -0.869697                                                                                   | 5.114395  | 1.387039  |           | 6  | -3.605433 | -2.497879 | 1.027938  |
| 1                                                                                                                        | -1.463296                                                                                   | 5.609721  | -0.621131 |           | 1  | -5.099743 | -2.828005 | -0.483269 |
| 1                                                                                                                        | -0.126972                                                                                   | 4.371467  | 3.263098  |           | 1  | -2.073322 | -1.881424 | 2.412771  |
| 1                                                                                                                        | -1.340734                                                                                   | 5.985220  | 1.826892  |           | 1  | -3.715876 | -3.483916 | 1.463980  |
| 16                                                                                                                       | -0.885565                                                                                   | -2.612865 | -0.349337 |           | 16 | 2.937926  | -0.769486 | -0.904581 |
| 6                                                                                                                        | -2.552727                                                                                   | -2.194993 | 0.082504  |           | 6  | 2.002433  | -2.261181 | -0.680775 |
| 6                                                                                                                        | -2.969274                                                                                   | -2.200148 | 1.418498  |           | 6  | 0.641270  | -2.253570 | -0.339201 |
| 6                                                                                                                        | -3.476024                                                                                   | -1.844370 | -0.906668 |           | 6  | 2.622832  | -3.507015 | -0.856552 |
| 6                                                                                                                        | -4.276245                                                                                   | -1.864089 | 1.754861  |           | 6  | -0.068998 | -3.441381 | -0.191507 |
| 1                                                                                                                        | -2.257216                                                                                   | -2.462183 | 2.193075  |           | 1  | 0.128446  | -1.312220 | -0.172168 |
| 6                                                                                                                        | -4.780008                                                                                   | -1.504233 | -0.567521 |           | 6  | 1.912592  | -4.691446 | -0.704778 |
| 1                                                                                                                        | -3.158149                                                                                   | -1.828340 | -1.942678 |           | 1  | 3.674029  | -3.534490 | -1.120829 |
| 6                                                                                                                        | -5.187691                                                                                   | -1.511879 | 0.763369  |           | 6  | 0.559025  | -4.668647 | -0.375194 |
| 1                                                                                                                        | -4.581115                                                                                   | -1.873206 | 2.795507  |           | 1  | -1.121213 | -3.398034 | 0.067715  |
| 1                                                                                                                        | -5.478195                                                                                   | -1.221801 | -1.347667 |           | 1  | 2.419527  | -5.639046 | -0.849632 |



|                                    |           |           |           |                                       |           |           |           |
|------------------------------------|-----------|-----------|-----------|---------------------------------------|-----------|-----------|-----------|
| 1                                  | -6.204681 | -1.244466 | 1.025440  | 1                                     | 0.005355  | -5.592749 | -0.262312 |
| 16                                 | 2.339356  | -1.839366 | -0.888551 | 16                                    | 0.898971  | 2.564018  | 0.563498  |
| 6                                  | 3.659785  | -0.757325 | -0.395756 | 6                                     | 0.396899  | 1.596421  | 1.966035  |
| 6                                  | 4.214134  | -0.834882 | 0.886972  | 6                                     | 0.783687  | 0.256777  | 2.123881  |
| 6                                  | 4.182458  | 0.184156  | -1.289536 | 6                                     | -0.418329 | 2.161283  | 2.957475  |
| 6                                  | 5.259780  | 0.001278  | 1.263089  | 6                                     | 0.355040  | -0.494271 | 3.213750  |
| 1                                  | 3.817918  | -1.555158 | 1.594050  | 1                                     | 1.397918  | -0.215100 | 1.364215  |
| 6                                  | 5.229326  | 1.019749  | -0.912218 | 6                                     | -0.851025 | 1.407337  | 4.041941  |
| 1                                  | 3.758795  | 0.257676  | -2.284626 | 1                                     | -0.728882 | 3.194879  | 2.855626  |
| 6                                  | 5.774763  | 0.932743  | 0.364966  | 6                                     | -0.471375 | 0.072655  | 4.178337  |
| 1                                  | 5.674157  | -0.077657 | 2.261898  | 1                                     | 0.661954  | -1.531664 | 3.294152  |
| 1                                  | 5.618788  | 1.741565  | -1.621383 | 1                                     | -1.494227 | 1.865030  | 4.785142  |
| 1                                  | 6.590651  | 1.582338  | 0.658100  | 1                                     | -0.814843 | -0.513376 | 5.022072  |
| 19                                 | 1.429578  | -4.135630 | 1.148361  | 19                                    | 3.717989  | 1.305857  | 1.476239  |
| <b>III-RC<sub>oA</sub></b>         |           |           |           | <b>III-TS<sub>oA</sub></b>            |           |           |           |
| E = -3346.2037578 (-3346.25202600) |           |           |           | E = -3346.1815283 (-3346.2267274)     |           |           |           |
| Nimag = 1(-15.9 cm <sup>-1</sup> ) |           |           |           | Nimag = 1 (-145.37 cm <sup>-1</sup> ) |           |           |           |
| Tc = 0.250208                      |           |           |           | Tc = 0.249326                         |           |           |           |
| 29                                 | -1.090355 | 0.114861  | 0.720488  | 29                                    | -0.902460 | 0.343737  | -0.239802 |
| 53                                 | -0.170878 | -1.514170 | -1.993650 | 53                                    | -2.706227 | -1.590936 | -0.495248 |
| 6                                  | -0.215261 | -1.758077 | 0.132484  | 6                                     | -0.418017 | -1.543046 | 0.179084  |
| 6                                  | -1.456761 | -2.013943 | 0.747297  | 6                                     | -0.216878 | -1.590222 | 1.559490  |
| 6                                  | -1.462769 | -2.450313 | 2.086524  | 6                                     | 0.882550  | -2.280749 | 2.060404  |
| 6                                  | -0.278424 | -2.648402 | 2.767482  | 6                                     | 1.743947  | -2.952973 | 1.199344  |
| 6                                  | 0.949828  | -2.449220 | 2.118352  | 6                                     | 1.520374  | -2.913123 | -0.173994 |
| 6                                  | 0.990791  | -2.036877 | 0.801710  | 6                                     | 0.435491  | -2.217699 | -0.691715 |
| 1                                  | -2.374109 | -2.027127 | 0.173486  | 1                                     | -0.916565 | -1.115809 | 2.238234  |
| 1                                  | -2.414272 | -2.644566 | 2.566290  | 1                                     | 1.049133  | -2.304985 | 3.131014  |
| 1                                  | -0.296588 | -2.984996 | 3.796655  | 1                                     | 2.588550  | -3.503439 | 1.594979  |
| 1                                  | 1.880298  | -2.631390 | 2.642613  | 1                                     | 2.196472  | -3.419960 | -0.852264 |
| 1                                  | 1.939894  | -1.902811 | 0.296684  | 1                                     | 0.253746  | -2.198111 | -1.759363 |
| 16                                 | 0.681551  | 1.720589  | 0.761770  | 16                                    | 1.273168  | 1.422127  | -0.446661 |
| 6                                  | 2.224075  | 0.868298  | 0.572343  | 6                                     | 2.648536  | 0.327018  | -0.223347 |
| 6                                  | 2.953715  | 0.431099  | 1.688090  | 6                                     | 3.207693  | 0.121656  | 1.046901  |
| 6                                  | 2.738294  | 0.581507  | -0.700316 | 6                                     | 3.239857  | -0.326377 | -1.315675 |
| 6                                  | 4.130410  | -0.291804 | 1.535391  | 6                                     | 4.300882  | -0.719516 | 1.220500  |
| 1                                  | 2.570326  | 0.643107  | 2.679734  | 1                                     | 2.760314  | 0.615733  | 1.902679  |
| 6                                  | 3.918754  | -0.141601 | -0.852893 | 6                                     | 4.333109  | -1.167347 | -1.140690 |
| 1                                  | 2.183362  | 0.899169  | -1.576611 | 1                                     | 2.821121  | -0.175174 | -2.304646 |
| 6                                  | 4.617446  | -0.590469 | 0.263529  | 6                                     | 4.865643  | -1.374765 | 0.129414  |
| 1                                  | 4.667567  | -0.629842 | 2.414679  | 1                                     | 4.707645  | -0.870693 | 2.214479  |
| 1                                  | 4.285816  | -0.361370 | -1.849224 | 1                                     | 4.767211  | -1.667061 | -1.999651 |
| 1                                  | 5.532143  | -1.158882 | 0.146474  | 1                                     | 5.714398  | -2.034306 | 0.265915  |
| 8                                  | -2.721515 | 1.040427  | 1.229169  | 8                                     | -1.792202 | 2.024640  | -0.553307 |
| 6                                  | -3.536251 | 1.485294  | 0.201684  | 6                                     | -2.581247 | 2.571002  | 0.451000  |
| 6                                  | -4.661702 | 2.344969  | 0.798166  | 6                                     | -2.298428 | 4.078436  | 0.548873  |
| 1                                  | -4.223213 | 3.193161  | 1.331221  | 1                                     | -2.474619 | 4.542421  | -0.425357 |
| 1                                  | -5.350719 | 2.726456  | 0.037980  | 1                                     | -2.928987 | 4.575542  | 1.293072  |
| 1                                  | -5.229225 | 1.748610  | 1.517853  | 1                                     | -1.249597 | 4.237368  | 0.816082  |

|                                                                                                                        |           |           |           |                                                                                                                        |           |           |           |
|------------------------------------------------------------------------------------------------------------------------|-----------|-----------|-----------|------------------------------------------------------------------------------------------------------------------------|-----------|-----------|-----------|
| 6                                                                                                                      | -4.163416 | 0.301309  | -0.558817 | 6                                                                                                                      | -2.276448 | 1.926581  | 1.817697  |
| 1                                                                                                                      | -4.875569 | 0.621863  | -1.326343 | 1                                                                                                                      | -2.829186 | 2.396118  | 2.637340  |
| 1                                                                                                                      | -3.374031 | -0.277758 | -1.050628 | 1                                                                                                                      | -2.548136 | 0.864903  | 1.797665  |
| 1                                                                                                                      | -4.677998 | -0.355015 | 0.148803  | 1                                                                                                                      | -1.205435 | 2.007319  | 2.030271  |
| 6                                                                                                                      | -2.740805 | 2.334918  | -0.807726 | 6                                                                                                                      | -4.069968 | 2.356774  | 0.128035  |
| 1                                                                                                                      | -3.375978 | 2.762727  | -1.590477 | 1                                                                                                                      | -4.730399 | 2.773501  | 0.895682  |
| 1                                                                                                                      | -2.230354 | 3.144673  | -0.278378 | 1                                                                                                                      | -4.304548 | 2.830743  | -0.829110 |
| 1                                                                                                                      | -1.973060 | 1.717425  | -1.286977 | 1                                                                                                                      | -4.268982 | 1.285609  | 0.035038  |
| 19                                                                                                                     | 2.359595  | 3.935981  | -0.568736 | 19                                                                                                                     | 3.803347  | 3.199286  | -0.456765 |
| <b>III-PC<sub>oA</sub></b><br>E = -3346.1944779 (-3346.2338355)<br>Nimag = 1(-18.5 cm <sup>-1</sup> )<br>Tc = 0.252735 |           |           |           | <b>III-RC<sub>RE</sub></b><br>E = -3964.6453166 (-3964.6804161)<br>Nimag = 1(-8.37 cm <sup>-1</sup> )<br>Tc = 0.340174 |           |           |           |
| 29                                                                                                                     | -0.822845 | 0.131564  | -0.319485 | 29                                                                                                                     | 0.493194  | -0.378486 | -0.595758 |
| 53                                                                                                                     | -2.944465 | -1.482676 | -0.215175 | 6                                                                                                                      | -1.148382 | 0.371588  | -1.223089 |
| 6                                                                                                                      | 0.216941  | -1.385838 | 0.198262  | 6                                                                                                                      | -1.705555 | -0.147582 | -2.384999 |
| 6                                                                                                                      | 0.325647  | -1.643868 | 1.557922  | 6                                                                                                                      | -2.965645 | 0.284837  | -2.795910 |
| 6                                                                                                                      | 1.088878  | -2.725782 | 1.995890  | 6                                                                                                                      | -3.659635 | 1.233025  | -2.050746 |
| 6                                                                                                                      | 1.733527  | -3.544833 | 1.074717  | 6                                                                                                                      | -3.092125 | 1.745069  | -0.887320 |
| 6                                                                                                                      | 1.612017  | -3.281783 | -0.286846 | 6                                                                                                                      | -1.834539 | 1.313931  | -0.469631 |
| 6                                                                                                                      | 0.855895  | -2.197656 | -0.727820 | 1                                                                                                                      | -1.167460 | -0.876605 | -2.982434 |
| 1                                                                                                                      | -0.181718 | -1.019724 | 2.286983  | 1                                                                                                                      | -3.399077 | -0.120714 | -3.703507 |
| 1                                                                                                                      | 1.173414  | -2.925667 | 3.058244  | 1                                                                                                                      | -4.637815 | 1.569565  | -2.373353 |
| 1                                                                                                                      | 2.327209  | -4.385271 | 1.414635  | 1                                                                                                                      | -3.628685 | 2.480001  | -0.297419 |
| 1                                                                                                                      | 2.110314  | -3.916102 | -1.011500 | 1                                                                                                                      | -1.401623 | 1.717826  | 0.440845  |
| 1                                                                                                                      | 0.780443  | -1.990565 | -1.790221 | 16                                                                                                                     | 1.319316  | 1.363245  | -1.793782 |
| 16                                                                                                                     | 1.092851  | 1.274734  | -0.568316 | 6                                                                                                                      | 1.487149  | 2.369545  | -0.338848 |
| 6                                                                                                                      | 2.596694  | 0.332956  | -0.471691 | 6                                                                                                                      | 0.789450  | 3.577565  | -0.240643 |
| 6                                                                                                                      | 3.136304  | -0.063972 | 0.756213  | 6                                                                                                                      | 2.331758  | 1.982623  | 0.711073  |
| 6                                                                                                                      | 3.287845  | 0.028998  | -1.649356 | 6                                                                                                                      | 0.934714  | 4.385419  | 0.883217  |
| 6                                                                                                                      | 4.335496  | -0.766400 | 0.801366  | 1                                                                                                                      | 0.132019  | 3.874534  | -1.049366 |
| 1                                                                                                                      | 2.599717  | 0.161310  | 1.670636  | 6                                                                                                                      | 2.463186  | 2.788902  | 1.836277  |
| 6                                                                                                                      | 4.493821  | -0.661255 | -1.599607 | 1                                                                                                                      | 2.862959  | 1.040153  | 0.627360  |
| 1                                                                                                                      | 2.867853  | 0.332797  | -2.601207 | 6                                                                                                                      | 1.768604  | 3.993697  | 1.926001  |
| 6                                                                                                                      | 5.017479  | -1.066551 | -0.374962 | 1                                                                                                                      | 0.391154  | 5.321175  | 0.943819  |
| 1                                                                                                                      | 4.736019  | -1.082183 | 1.757797  | 1                                                                                                                      | 3.118393  | 2.480119  | 2.643154  |
| 1                                                                                                                      | 5.020031  | -0.890592 | -2.518797 | 1                                                                                                                      | 1.877553  | 4.622254  | 2.801724  |
| 1                                                                                                                      | 5.951816  | -1.613762 | -0.337101 | 16                                                                                                                     | -0.626423 | -1.861788 | 0.733456  |
| 8                                                                                                                      | -1.736124 | 1.689227  | -0.809265 | 6                                                                                                                      | -2.311348 | -1.391395 | 1.028790  |
| 6                                                                                                                      | -2.276477 | 2.536511  | 0.166598  | 6                                                                                                                      | -2.642111 | -0.628033 | 2.153500  |
| 6                                                                                                                      | -1.628672 | 3.921342  | 0.027766  | 6                                                                                                                      | -3.329277 | -1.778032 | 0.152676  |
| 1                                                                                                                      | -1.786411 | 4.296753  | -0.986460 | 6                                                                                                                      | -3.960025 | -0.255117 | 2.392886  |
| 1                                                                                                                      | -2.043502 | 4.642992  | 0.738396  | 1                                                                                                                      | -1.855875 | -0.321615 | 2.834427  |
| 1                                                                                                                      | -0.551508 | 3.836128  | 0.196900  | 6                                                                                                                      | -4.645556 | -1.400215 | 0.391051  |
| 6                                                                                                                      | -2.018474 | 2.014185  | 1.591261  | 1                                                                                                                      | -3.078172 | -2.365376 | -0.722653 |
| 1                                                                                                                      | -2.433533 | 2.688530  | 2.345561  | 6                                                                                                                      | -4.966452 | -0.635921 | 1.509900  |
| 1                                                                                                                      | -2.478877 | 1.030926  | 1.725398  | 1                                                                                                                      | -4.200752 | 0.337128  | 3.268536  |
| 1                                                                                                                      | -0.941590 | 1.928263  | 1.772797  | 1                                                                                                                      | -5.423024 | -1.700627 | -0.302298 |
| 6                                                                                                                      | -3.790360 | 2.650835  | -0.056314 | 1                                                                                                                      | -5.993115 | -0.341772 | 1.693430  |

|                                                                                                                         |           |           |           |                                                                                               |           |           |           |
|-------------------------------------------------------------------------------------------------------------------------|-----------|-----------|-----------|-----------------------------------------------------------------------------------------------|-----------|-----------|-----------|
| 1                                                                                                                       | -4.254800 | 3.345582  | 0.650527  | 6                                                                                             | 2.960787  | -1.892841 | -0.789969 |
| 1                                                                                                                       | -3.980388 | 3.006282  | -1.072534 | 19                                                                                            | 1.901018  | -1.354272 | 2.591535  |
| 1                                                                                                                       | -4.254162 | 1.667542  | 0.055597  | 8                                                                                             | 2.104734  | -1.188670 | 0.072298  |
| 19                                                                                                                      | 3.039096  | 3.519070  | 0.571604  | 6                                                                                             | 4.173728  | -1.024520 | -1.147688 |
|                                                                                                                         |           |           |           | 1                                                                                             | 3.835576  | -0.107071 | -1.632924 |
|                                                                                                                         |           |           |           | 1                                                                                             | 4.710484  | -0.752891 | -0.233858 |
|                                                                                                                         |           |           |           | 1                                                                                             | 4.865981  | -1.549663 | -1.813064 |
|                                                                                                                         |           |           |           | 6                                                                                             | 2.226405  | -2.309440 | -2.074252 |
|                                                                                                                         |           |           |           | 1                                                                                             | 2.857743  | -2.929976 | -2.716331 |
|                                                                                                                         |           |           |           | 1                                                                                             | 1.328325  | -2.881705 | -1.819971 |
|                                                                                                                         |           |           |           | 1                                                                                             | 1.930080  | -1.428317 | -2.652262 |
|                                                                                                                         |           |           |           | 6                                                                                             | 3.436445  | -3.158936 | -0.065203 |
|                                                                                                                         |           |           |           | 1                                                                                             | 2.574319  | -3.770727 | 0.216501  |
|                                                                                                                         |           |           |           | 1                                                                                             | 4.101910  | -3.760782 | -0.690886 |
|                                                                                                                         |           |           |           | 1                                                                                             | 3.983499  | -2.886623 | 0.842730  |
| <b>III-TS<sub>RE</sub></b><br>E = -3964.644581 (-3964.6807175)<br>Nimag = 1(-135.06 cm <sup>-1</sup> )<br>Tc = 0.339463 |           |           |           | <b>III-PC<sub>RE</sub></b><br>E = -3964.6815088 (-3864.7298454)<br>Nimag = 0<br>Tc = 0.336730 |           |           |           |
| 29                                                                                                                      | 0.480867  | -0.386890 | -0.577161 | 29                                                                                            | -0.188833 | -0.412106 | -0.589266 |
| 6                                                                                                                       | -1.076462 | 0.550853  | -1.243922 | 6                                                                                             | 0.578058  | 1.657660  | -1.061105 |
| 6                                                                                                                       | -1.648396 | 0.054820  | -2.412752 | 6                                                                                             | -0.453424 | 1.314447  | -1.956446 |
| 6                                                                                                                       | -2.970977 | 0.368883  | -2.716323 | 6                                                                                             | -1.777430 | 1.671269  | -1.667280 |
| 6                                                                                                                       | -3.715036 | 1.180619  | -1.865852 | 6                                                                                             | -2.095448 | 2.317994  | -0.485407 |
| 6                                                                                                                       | -3.134499 | 1.666821  | -0.697799 | 6                                                                                             | -1.079065 | 2.608620  | 0.427313  |
| 6                                                                                                                       | -1.815070 | 1.356457  | -0.383005 | 6                                                                                             | 0.242255  | 2.291621  | 0.149116  |
| 1                                                                                                                       | -1.067569 | -0.555293 | -3.096852 | 1                                                                                             | -0.209142 | 0.886822  | -2.923407 |
| 1                                                                                                                       | -3.413450 | -0.020859 | -3.626407 | 1                                                                                             | -2.556846 | 1.410836  | -2.372822 |
| 1                                                                                                                       | -4.742038 | 1.427562  | -2.107694 | 1                                                                                             | -3.126249 | 2.563993  | -0.259104 |
| 1                                                                                                                       | -3.710852 | 2.287979  | -0.021384 | 1                                                                                             | -1.316576 | 3.100362  | 1.363312  |
| 1                                                                                                                       | -1.367211 | 1.751948  | 0.523603  | 1                                                                                             | 1.024449  | 2.562673  | 0.847405  |
| 16                                                                                                                      | 1.078027  | 1.465295  | -1.715295 | 16                                                                                            | 2.261341  | 1.516970  | -1.645558 |
| 6                                                                                                                       | 1.391113  | 2.406408  | -0.239933 | 6                                                                                             | 3.192894  | 1.552390  | -0.120549 |
| 6                                                                                                                       | 0.811962  | 3.671155  | -0.099840 | 6                                                                                             | 4.095958  | 2.591107  | 0.092392  |
| 6                                                                                                                       | 2.234752  | 1.916061  | 0.764779  | 6                                                                                             | 3.036547  | 0.534360  | 0.821805  |
| 6                                                                                                                       | 1.079361  | 4.440293  | 1.028590  | 6                                                                                             | 4.859564  | 2.609383  | 1.257324  |
| 1                                                                                                                       | 0.152814  | 4.042466  | -0.875890 | 1                                                                                             | 4.198080  | 3.378389  | -0.645012 |
| 6                                                                                                                       | 2.489362  | 2.688472  | 1.892117  | 6                                                                                             | 3.791794  | 0.575297  | 1.988755  |
| 1                                                                                                                       | 2.671246  | 0.928887  | 0.646732  | 1                                                                                             | 2.341074  | -0.282467 | 0.625928  |
| 6                                                                                                                       | 1.916340  | 3.951432  | 2.026919  | 6                                                                                             | 4.704971  | 1.605413  | 2.207061  |
| 1                                                                                                                       | 0.629878  | 5.421402  | 1.127806  | 1                                                                                             | 5.566780  | 3.413156  | 1.422798  |
| 1                                                                                                                       | 3.145443  | 2.305981  | 2.665699  | 1                                                                                             | 3.675828  | -0.210318 | 2.727004  |
| 1                                                                                                                       | 2.123224  | 4.551028  | 2.905332  | 1                                                                                             | 5.295594  | 1.623929  | 3.115350  |
| 16                                                                                                                      | -0.652319 | -1.975781 | 0.700048  | 16                                                                                            | -2.238588 | -1.507075 | 0.110372  |
| 6                                                                                                                       | -2.325493 | -1.461088 | 0.975422  | 6                                                                                             | -3.579374 | -0.377300 | 0.360722  |
| 6                                                                                                                       | -2.675663 | -0.761982 | 2.136994  | 6                                                                                             | -3.756063 | 0.278153  | 1.586621  |
| 6                                                                                                                       | -3.322928 | -1.733703 | 0.034536  | 6                                                                                             | -4.478652 | -0.084806 | -0.672946 |
| 6                                                                                                                       | -3.986189 | -0.350277 | 2.351592  | 6                                                                                             | -4.781128 | 1.200249  | 1.767465  |
| 1                                                                                                                       | -1.907927 | -0.540184 | 2.870134  | 1                                                                                             | -3.066537 | 0.069639  | 2.397425  |

|                                 |           |           |           |                                       |           |           |           |
|---------------------------------|-----------|-----------|-----------|---------------------------------------|-----------|-----------|-----------|
| 6                               | -4.631228 | -1.315659 | 0.247175  | 6                                     | -5.502873 | 0.839508  | -0.493775 |
| 1                               | -3.060890 | -2.265490 | -0.872567 | 1                                     | -4.357501 | -0.582182 | -1.628959 |
| 6                               | -4.970879 | -0.623571 | 1.405925  | 6                                     | -5.659502 | 1.492784  | 0.726526  |
| 1                               | -4.237525 | 0.189527  | 3.257797  | 1                                     | -4.890667 | 1.696414  | 2.725649  |
| 1                               | -5.387580 | -1.523643 | -0.501712 | 1                                     | -6.180401 | 1.051744  | -1.313569 |
| 1                               | -5.991317 | -0.297531 | 1.569392  | 1                                     | -6.454703 | 2.215349  | 0.865247  |
| 6                               | 3.042435  | -1.773432 | -0.879032 | 6                                     | 1.655452  | -2.668695 | -0.833372 |
| 19                              | 1.903515  | -1.669409 | 2.506368  | 19                                    | -0.128984 | -2.476841 | 2.213649  |
| 8                               | 2.142595  | -1.210174 | 0.033787  | 8                                     | 1.066032  | -1.820089 | 0.104337  |
| 6                               | 4.166318  | -0.777402 | -1.198695 | 6                                     | 3.168506  | -2.411834 | -0.911864 |
| 1                               | 3.739823  | 0.137043  | -1.617649 | 1                                     | 3.354455  | -1.388421 | -1.250099 |
| 1                               | 4.697568  | -0.517661 | -0.278105 | 1                                     | 3.614046  | -2.527578 | 0.080683  |
| 1                               | 4.888029  | -1.190697 | -1.910378 | 1                                     | 3.664568  | -3.102339 | -1.601186 |
| 6                               | 2.322532  | -2.169072 | -2.178427 | 6                                     | 1.047235  | -2.445197 | -2.228441 |
| 1                               | 2.983760  | -2.703522 | -2.866521 | 1                                     | 1.486324  | -3.101918 | -2.985637 |
| 1                               | 1.470743  | -2.815221 | -1.943987 | 1                                     | -0.032007 | -2.626338 | -2.197168 |
| 1                               | 1.952686  | -1.278795 | -2.696981 | 1                                     | 1.220407  | -1.408017 | -2.537237 |
| 6                               | 3.648290  | -3.035910 | -0.249708 | 6                                     | 1.413224  | -4.128580 | -0.418036 |
| 1                               | 2.851976  | -3.745844 | -0.005927 | 1                                     | 0.336859  | -4.320742 | -0.355123 |
| 1                               | 4.360288  | -3.527134 | -0.919300 | 1                                     | 1.848178  | -4.841507 | -1.125062 |
| 1                               | 4.177017  | -2.775267 | 0.672625  | 1                                     | 1.857542  | -4.311117 | 0.565963  |
| <b>IV-RC<sub>OA</sub></b>       |           |           |           | <b>IV-TS<sub>OA</sub></b>             |           |           |           |
| E = -3989.81121 (-3989.8962993) |           |           |           | E = -3989.7750618 (-3989.8962993)     |           |           |           |
| Nimag = 0                       |           |           |           | Nimag = 1 (-118.63 cm <sup>-1</sup> ) |           |           |           |
| Tc = 0.279084                   |           |           |           | Tc = 0.283639                         |           |           |           |
| 29                              | -2.362123 | -1.616781 | -0.500913 | 29                                    | 1.703639  | 0.104086  | -0.449265 |
| 53                              | 0.208542  | 2.522332  | -0.076864 | 53                                    | -0.019325 | -2.228501 | 0.120874  |
| 6                               | 0.117595  | 0.408900  | -0.090379 | 6                                     | -0.285631 | 0.393175  | -0.039537 |
| 6                               | -0.078224 | -0.285132 | -1.290209 | 6                                     | -0.109110 | 1.153094  | -1.207747 |
| 6                               | -0.369313 | -1.671016 | -1.256726 | 6                                     | 0.100224  | 2.534448  | -1.079049 |
| 6                               | -0.421716 | -2.352547 | -0.034965 | 6                                     | 0.191939  | 3.120125  | 0.173782  |
| 6                               | -0.156388 | -1.649733 | 1.159288  | 6                                     | 0.099216  | 2.334503  | 1.324534  |
| 6                               | 0.152624  | -0.300351 | 1.135873  | 6                                     | -0.114192 | 0.964426  | 1.231596  |
| 1                               | -0.116162 | 0.243814  | -2.233846 | 1                                     | -0.271038 | 0.719680  | -2.187228 |
| 1                               | -0.437286 | -2.210540 | -2.193445 | 1                                     | 0.177137  | 3.133621  | -1.977780 |
| 1                               | -0.549183 | -3.427522 | -0.013136 | 1                                     | 0.351598  | 4.187116  | 0.260488  |
| 1                               | -0.148944 | -2.178947 | 2.103645  | 1                                     | 0.205936  | 2.782439  | 2.304885  |
| 1                               | 0.345934  | 0.229503  | 2.059795  | 1                                     | -0.202072 | 0.358882  | 2.124307  |
| 8                               | -4.165781 | -1.176128 | -0.480158 | 8                                     | 3.519112  | -0.175399 | -0.746616 |
| 6                               | -4.515557 | -0.152237 | 0.400273  | 6                                     | 4.358190  | 0.527656  | 0.117925  |
| 6                               | -3.481442 | 0.986227  | 0.345729  | 6                                     | 4.270519  | -0.060111 | 1.534993  |
| 1                               | -3.318251 | 1.279148  | -0.695508 | 1                                     | 4.543002  | -1.118543 | 1.507459  |
| 1                               | -3.781155 | 1.867191  | 0.921642  | 1                                     | 4.921730  | 0.454712  | 2.248191  |
| 1                               | -2.523673 | 0.635985  | 0.750189  | 1                                     | 3.238516  | 0.011335  | 1.896715  |
| 6                               | -4.586946 | -0.690833 | 1.837032  | 6                                     | 3.955205  | 2.010901  | 0.160251  |
| 1                               | -4.849063 | 0.083365  | 2.564978  | 1                                     | 4.648537  | 2.625928  | 0.741987  |
| 1                               | -5.329005 | -1.491672 | 1.891997  | 1                                     | 3.903888  | 2.397880  | -0.860922 |
| 1                               | -3.614100 | -1.112272 | 2.112487  | 1                                     | 2.959161  | 2.114071  | 0.607496  |
| 6                               | -5.888016 | 0.391409  | -0.013665 | 6                                     | 5.796553  | 0.405996  | -0.397599 |

|                                                                                   |           |           |           |                                                                                       |           |           |           |
|-----------------------------------------------------------------------------------|-----------|-----------|-----------|---------------------------------------------------------------------------------------|-----------|-----------|-----------|
| 1                                                                                 | -6.242288 | 1.178910  | 0.657832  | 1                                                                                     | 6.513099  | 0.919161  | 0.250262  |
| 1                                                                                 | -5.830310 | 0.793826  | -1.028470 | 1                                                                                     | 6.071244  | -0.650274 | -0.457190 |
| 1                                                                                 | -6.614899 | -0.424889 | -0.011942 | 1                                                                                     | 5.863038  | 0.832692  | -1.401801 |
| 29                                                                                | 2.034698  | -0.253341 | -0.501773 | 29                                                                                    | -1.893795 | -0.643482 | -0.346021 |
| 8                                                                                 | 3.798809  | -0.756064 | -0.813677 | 8                                                                                     | -3.504577 | 0.080059  | -0.844942 |
| 6                                                                                 | 4.580022  | -0.815937 | 0.340318  | 6                                                                                     | -4.201863 | 0.832312  | 0.108421  |
| 6                                                                                 | 6.041282  | -1.012154 | -0.079630 | 6                                                                                     | -5.681189 | 0.851239  | -0.285815 |
| 1                                                                                 | 6.355407  | -0.172281 | -0.704687 | 1                                                                                     | -6.072739 | -0.169005 | -0.293443 |
| 1                                                                                 | 6.714245  | -1.082378 | 0.779905  | 1                                                                                     | -6.279020 | 1.452572  | 0.404747  |
| 1                                                                                 | 6.127807  | -1.928306 | -0.669443 | 1                                                                                     | -5.783906 | 1.265329  | -1.291684 |
| 6                                                                                 | 4.141239  | -1.994011 | 1.224602  | 6                                                                                     | -3.646652 | 2.263422  | 0.123823  |
| 1                                                                                 | 3.099655  | -1.856450 | 1.536130  | 1                                                                                     | -2.577777 | 2.236875  | 0.357761  |
| 1                                                                                 | 4.199112  | -2.921380 | 0.648763  | 1                                                                                     | -3.765445 | 2.714578  | -0.864625 |
| 1                                                                                 | 4.755925  | -2.096030 | 2.124306  | 1                                                                                     | -4.148747 | 2.893724  | 0.863550  |
| 6                                                                                 | 4.451875  | 0.491267  | 1.140416  | 6                                                                                     | -4.047141 | 0.206845  | 1.502379  |
| 1                                                                                 | 3.419406  | 0.615017  | 1.490818  | 1                                                                                     | -2.997894 | 0.248992  | 1.821673  |
| 1                                                                                 | 5.108646  | 0.523889  | 2.015125  | 1                                                                                     | -4.642677 | 0.719046  | 2.262714  |
| 1                                                                                 | 4.684351  | 1.336401  | 0.487468  | 1                                                                                     | -4.349509 | -0.843261 | 1.464133  |
| <b>IV-PCoA</b><br>E = -3989.7853548 (-3989.8673758)<br>Nimag = 0<br>Tc = 0.285019 |           |           |           | <b>IV-RCRE + KI</b><br>E = -5219.676311 (-5219.7438055)<br>Nimag = 0<br>Tc = 0.366007 |           |           |           |
| 29                                                                                | 1.269724  | 0.255232  | -0.472925 | 29                                                                                    | 0.981556  | 0.004257  | -0.416395 |
| 53                                                                                | 0.246771  | -2.449154 | 0.324144  | 53                                                                                    | -0.544728 | 2.960715  | 0.737616  |
| 6                                                                                 | -0.504010 | 0.799688  | 0.176785  | 6                                                                                     | -0.768541 | -0.741173 | -0.957331 |
| 6                                                                                 | -0.363390 | 1.837632  | -0.750527 | 6                                                                                     | -0.710697 | -2.111002 | -1.238682 |
| 6                                                                                 | -0.086479 | 3.130929  | -0.284416 | 6                                                                                     | -0.597431 | -2.525864 | -2.557706 |
| 6                                                                                 | 0.017066  | 3.370729  | 1.075039  | 6                                                                                     | -0.556523 | -1.589291 | -3.594893 |
| 6                                                                                 | -0.128858 | 2.324600  | 1.991352  | 6                                                                                     | -0.622513 | -0.234588 | -3.315130 |
| 6                                                                                 | -0.398979 | 1.034668  | 1.555193  | 6                                                                                     | -0.736785 | 0.204585  | -1.988820 |
| 1                                                                                 | -0.581360 | 1.671905  | -1.798585 | 1                                                                                     | -0.738788 | -2.842527 | -0.438060 |
| 1                                                                                 | 0.006324  | 3.940128  | -0.998064 | 1                                                                                     | -0.541932 | -3.585072 | -2.777775 |
| 1                                                                                 | 0.214940  | 4.373074  | 1.433758  | 1                                                                                     | -0.473780 | -1.927072 | -4.620521 |
| 1                                                                                 | -0.021818 | 2.509741  | 3.053188  | 1                                                                                     | -0.602637 | 0.496386  | -4.114516 |
| 1                                                                                 | -0.491143 | 0.225873  | 2.268719  | 1                                                                                     | -0.856982 | 1.262196  | -1.775259 |
| 8                                                                                 | 3.011202  | 0.052158  | -1.096032 | 8                                                                                     | 2.805645  | 0.544006  | -0.313674 |
| 6                                                                                 | 3.973964  | 0.650500  | -0.280610 | 6                                                                                     | 3.471147  | 0.500798  | -1.548923 |
| 6                                                                                 | 4.154759  | -0.170466 | 1.005280  | 6                                                                                     | 3.024577  | 1.679908  | -2.423219 |
| 1                                                                                 | 4.439322  | -1.193802 | 0.746810  | 1                                                                                     | 3.259657  | 2.622666  | -1.921498 |
| 1                                                                                 | 4.911436  | 0.251039  | 1.674203  | 1                                                                                     | 3.509562  | 1.672951  | -3.403653 |
| 1                                                                                 | 3.202694  | -0.214168 | 1.545958  | 1                                                                                     | 1.940506  | 1.637756  | -2.572956 |
| 6                                                                                 | 3.543740  | 2.079829  | 0.091541  | 6                                                                                     | 3.145565  | -0.817191 | -2.269750 |
| 1                                                                                 | 4.315364  | 2.624507  | 0.643783  | 1                                                                                     | 3.679180  | -0.915599 | -3.219063 |
| 1                                                                                 | 3.298144  | 2.632055  | -0.819646 | 1                                                                                     | 3.406871  | -1.663931 | -1.628715 |
| 1                                                                                 | 2.642876  | 2.051533  | 0.717951  | 1                                                                                     | 2.071361  | -0.874913 | -2.485584 |
| 6                                                                                 | 5.297585  | 0.701742  | -1.050550 | 6                                                                                     | 4.978121  | 0.585753  | -1.294212 |
| 1                                                                                 | 6.103507  | 1.145715  | -0.459111 | 1                                                                                     | 5.550838  | 0.574619  | -2.225665 |
| 1                                                                                 | 5.589752  | -0.311800 | -1.336823 | 1                                                                                     | 5.207799  | 1.509763  | -0.756460 |
| 1                                                                                 | 5.166243  | 1.289252  | -1.963103 | 1                                                                                     | 5.295915  | -0.259426 | -0.677803 |

|                                      |           |           |           |                                   |           |           |           |
|--------------------------------------|-----------|-----------|-----------|-----------------------------------|-----------|-----------|-----------|
| 29                                   | -1.501970 | -0.754185 | -0.369813 | 29                                | -1.570518 | -0.339211 | 0.775852  |
| 8                                    | -2.837031 | 0.183835  | -1.075839 | 8                                 | -3.288306 | -0.728151 | 0.458443  |
| 6                                    | -3.888759 | 0.668279  | -0.266286 | 6                                 | -4.230974 | -0.198687 | -0.434533 |
| 6                                    | -5.155077 | 0.547367  | -1.121567 | 6                                 | -5.605249 | -0.385703 | 0.220627  |
| 1                                    | -5.328180 | -0.497522 | -1.386387 | 1                                 | -5.643065 | 0.163228  | 1.164153  |
| 1                                    | -6.023770 | 0.925063  | -0.576601 | 1                                 | -6.402814 | -0.021955 | -0.432741 |
| 1                                    | -5.034588 | 1.125375  | -2.039786 | 1                                 | -5.774377 | -1.444891 | 0.426872  |
| 6                                    | -3.642087 | 2.133661  | 0.098128  | 6                                 | -4.185568 | -0.973712 | -1.756645 |
| 1                                    | -2.766913 | 2.230899  | 0.745436  | 1                                 | -3.208021 | -0.861290 | -2.231477 |
| 1                                    | -3.465450 | 2.712921  | -0.811042 | 1                                 | -4.353120 | -2.036333 | -1.563382 |
| 1                                    | -4.504464 | 2.553215  | 0.622015  | 1                                 | -4.952029 | -0.617740 | -2.450652 |
| 6                                    | -4.025763 | -0.184946 | 0.997306  | 6                                 | -3.972464 | 1.288870  | -0.673828 |
| 1                                    | -3.138655 | -0.079198 | 1.631765  | 1                                 | -2.998155 | 1.432414  | -1.145332 |
| 1                                    | -4.891049 | 0.114525  | 1.592756  | 1                                 | -4.735996 | 1.732871  | -1.318157 |
| 1                                    | -4.142580 | -1.238769 | 0.727544  | 1                                 | -3.959556 | 1.820845  | 0.280745  |
|                                      |           |           |           | 16                                | 0.328100  | -0.386320 | 1.898203  |
|                                      |           |           |           | 6                                 | 0.780610  | -2.109273 | 1.789643  |
|                                      |           |           |           | 6                                 | 1.989369  | -2.451592 | 1.176295  |
|                                      |           |           |           | 6                                 | -0.046158 | -3.104364 | 2.311867  |
|                                      |           |           |           | 6                                 | 2.353956  | -3.788024 | 1.071918  |
|                                      |           |           |           | 1                                 | 2.625725  | -1.667405 | 0.775633  |
|                                      |           |           |           | 6                                 | 0.326889  | -4.440644 | 2.200125  |
|                                      |           |           |           | 1                                 | -0.975354 | -2.833110 | 2.799800  |
|                                      |           |           |           | 6                                 | 1.523318  | -4.784809 | 1.578895  |
|                                      |           |           |           | 1                                 | 3.287536  | -4.051267 | 0.588793  |
|                                      |           |           |           | 1                                 | -0.320376 | -5.210992 | 2.601467  |
|                                      |           |           |           | 1                                 | 1.808700  | -5.825988 | 1.491380  |
|                                      |           |           |           | 19                                | 2.741664  | 2.007362  | 1.726786  |
| <b>IV-TS<sub>RE</sub></b>            |           |           |           | <b>IV-PC<sub>RE</sub></b>         |           |           |           |
| E = -4608.2460638 ()                 |           |           |           | E = -4608.2820786 (-4608.3701882) |           |           |           |
| Nimag = 1(-107.55 cm <sup>-1</sup> ) |           |           |           | Nimag = 0                         |           |           |           |
| Tc = 0.373373                        |           |           |           | Tc = 0.369926                     |           |           |           |
| 29                                   | -1.909354 | 0.061313  | -1.123101 | 29                                | -2.639329 | 0.527109  | -0.917296 |
| 6                                    | -0.467180 | -0.861591 | -0.187794 | 6                                 | -0.087821 | -0.668842 | -0.504740 |
| 6                                    | -0.176849 | -0.484605 | 1.129127  | 6                                 | -0.151025 | -0.613083 | 0.900511  |
| 6                                    | 0.104753  | -1.476181 | 2.071075  | 6                                 | -0.013899 | -1.776429 | 1.637621  |
| 6                                    | 0.152318  | -2.814292 | 1.693951  | 6                                 | 0.200377  | -3.003732 | 1.000123  |
| 6                                    | -0.042424 | -3.167926 | 0.362362  | 6                                 | 0.294319  | -3.059224 | -0.379795 |
| 6                                    | -0.328316 | -2.195402 | -0.597505 | 6                                 | 0.159909  | -1.891448 | -1.151363 |
| 1                                    | -0.237204 | 0.553915  | 1.437897  | 1                                 | -0.325069 | 0.334808  | 1.396382  |
| 1                                    | 0.289917  | -1.186479 | 3.098274  | 1                                 | -0.078607 | -1.728440 | 2.717503  |
| 1                                    | 0.365676  | -3.577756 | 2.431151  | 1                                 | 0.297335  | -3.908473 | 1.586181  |
| 1                                    | 0.025775  | -4.203792 | 0.053354  | 1                                 | 0.464443  | -4.002399 | -0.882854 |
| 1                                    | -0.530956 | -2.482569 | -1.621397 | 1                                 | 0.122949  | -1.953153 | -2.233463 |
| 16                                   | -0.106930 | 1.028089  | -1.791461 | 16                                | -0.500838 | 0.750646  | -1.534861 |
| 6                                    | 0.168703  | 2.229442  | -0.514132 | 6                                 | 0.069954  | 2.102405  | -0.507986 |
| 6                                    | -0.890219 | 2.981009  | -0.000318 | 6                                 | -0.860868 | 2.928105  | 0.116988  |
| 6                                    | 1.470662  | 2.414416  | -0.038274 | 6                                 | 1.440315  | 2.307420  | -0.360693 |
| 6                                    | -0.646609 | 3.910784  | 1.003948  | 6                                 | -0.408153 | 3.993167  | 0.887946  |

|                                                                                  |           |           |           |                                                                                                              |           |           |           |
|----------------------------------------------------------------------------------|-----------|-----------|-----------|--------------------------------------------------------------------------------------------------------------|-----------|-----------|-----------|
| 1                                                                                | -1.891462 | 2.854718  | -0.395927 | 1                                                                                                            | -1.922245 | 2.737107  | 0.006927  |
| 6                                                                                | 1.700977  | 3.355307  | 0.957761  | 6                                                                                                            | 1.875644  | 3.369047  | 0.423012  |
| 1                                                                                | 2.288086  | 1.816182  | -0.434044 | 1                                                                                                            | 2.164065  | 1.649553  | -0.833819 |
| 6                                                                                | 0.646662  | 4.097887  | 1.483509  | 6                                                                                                            | 0.956308  | 4.213013  | 1.040904  |
| 1                                                                                | -1.467574 | 4.491500  | 1.406027  | 1                                                                                                            | -1.125425 | 4.642390  | 1.374109  |
| 1                                                                                | 2.707730  | 3.499707  | 1.331398  | 1                                                                                                            | 2.938073  | 3.537773  | 0.548359  |
| 1                                                                                | 0.832238  | 4.825034  | 2.264573  | 1                                                                                                            | 1.304620  | 5.041447  | 1.645419  |
| 8                                                                                | -3.559176 | -0.655771 | -0.848130 | 8                                                                                                            | -4.370162 | 0.309822  | -0.279674 |
| 6                                                                                | -4.170818 | -0.615619 | 0.411214  | 6                                                                                                            | -4.489886 | -0.727342 | 0.645590  |
| 6                                                                                | -5.686928 | -0.661967 | 0.200029  | 6                                                                                                            | -5.980690 | -1.029014 | 0.840908  |
| 1                                                                                | -6.003205 | 0.206126  | -0.383817 | 1                                                                                                            | -6.493233 | -0.120157 | 1.166336  |
| 1                                                                                | -5.948926 | -1.564497 | -0.357118 | 1                                                                                                            | -6.416915 | -1.343434 | -0.110997 |
| 1                                                                                | -6.228719 | -0.664804 | 1.149921  | 1                                                                                                            | -6.152120 | -1.814388 | 1.582898  |
| 6                                                                                | -3.799278 | 0.677949  | 1.150547  | 6                                                                                                            | -3.870959 | -0.313633 | 1.990149  |
| 1                                                                                | -4.311215 | 0.770643  | 2.112182  | 1                                                                                                            | -3.948167 | -1.096989 | 2.750953  |
| 1                                                                                | -2.720992 | 0.708260  | 1.347432  | 1                                                                                                            | -2.811209 | -0.081267 | 1.840429  |
| 1                                                                                | -4.061888 | 1.540327  | 0.530905  | 1                                                                                                            | -4.365863 | 0.588745  | 2.358440  |
| 6                                                                                | -3.725304 | -1.831201 | 1.235432  | 6                                                                                                            | -3.779890 | -1.997273 | 0.139616  |
| 1                                                                                | -2.638168 | -1.822761 | 1.355030  | 1                                                                                                            | -2.695070 | -1.834900 | 0.101483  |
| 1                                                                                | -4.183739 | -1.842093 | 2.228586  | 1                                                                                                            | -3.963254 | -2.867720 | 0.777429  |
| 1                                                                                | -4.002026 | -2.748807 | 0.709966  | 1                                                                                                            | -4.123151 | -2.219089 | -0.874243 |
| 29                                                                               | 1.505648  | -0.582518 | -0.653918 | 29                                                                                                           | 2.023842  | -0.871860 | -0.776953 |
| 8                                                                                | 3.338257  | -0.282661 | -0.933215 | 8                                                                                                            | 3.804710  | -0.328570 | -0.775667 |
| 6                                                                                | 4.178764  | -0.718410 | 0.093459  | 6                                                                                                            | 4.483183  | -0.548545 | 0.427296  |
| 6                                                                                | 5.620690  | -0.714898 | -0.425107 | 6                                                                                                            | 5.988398  | -0.436607 | 0.161580  |
| 1                                                                                | 5.883717  | 0.292915  | -0.756672 | 1                                                                                                            | 6.206720  | 0.544420  | -0.267801 |
| 1                                                                                | 6.337045  | -1.031645 | 0.338577  | 1                                                                                                            | 6.577800  | -0.559088 | 1.074859  |
| 1                                                                                | 5.701199  | -1.388048 | -1.282658 | 1                                                                                                            | 6.294211  | -1.200330 | -0.558284 |
| 6                                                                                | 4.070035  | 0.220776  | 1.305559  | 6                                                                                                            | 4.069614  | 0.500711  | 1.469145  |
| 1                                                                                | 4.347999  | 1.237029  | 1.010231  | 1                                                                                                            | 4.309496  | 1.500984  | 1.098127  |
| 1                                                                                | 3.034103  | 0.243586  | 1.663036  | 1                                                                                                            | 2.986902  | 0.450854  | 1.631223  |
| 1                                                                                | 4.713006  | -0.091361 | 2.134180  | 1                                                                                                            | 4.570133  | 0.353411  | 2.431001  |
| 6                                                                                | 3.793749  | -2.141014 | 0.529438  | 6                                                                                                            | 4.164660  | -1.949749 | 0.973823  |
| 1                                                                                | 2.783592  | -2.137201 | 0.955442  | 1                                                                                                            | 3.104632  | -2.010390 | 1.251677  |
| 1                                                                                | 3.786103  | -2.798560 | -0.344085 | 1                                                                                                            | 4.351094  | -2.692807 | 0.194017  |
| 1                                                                                | 4.475243  | -2.553397 | 1.279563  | 1                                                                                                            | 4.757027  | -2.204728 | 1.857596  |
| <b>V-RCoA</b><br>E = -2666.0505721 (-2666.1008909)<br>Nimag = 0<br>Tc = 0.182763 |           |           |           | <b>V-TSoA</b><br>E = -2666.0146131 (-2666.0639188)<br>Nimag = 1 (-111.00 cm <sup>-1</sup> )<br>Tc = 0.182549 |           |           |           |
| 29                                                                               | -0.705797 | -1.092439 | -0.979649 | 29                                                                                                           | 0.420375  | -0.707556 | -0.657337 |
| 53                                                                               | 2.999040  | 0.025795  | 0.527932  | 53                                                                                                           | 2.404168  | -0.529797 | 0.937066  |
| 6                                                                                | 1.432385  | 0.663257  | -0.748792 | 6                                                                                                            | 0.805449  | 1.189037  | -0.415929 |
| 6                                                                                | 0.811015  | 1.874479  | -0.511694 | 6                                                                                                            | 0.009337  | 1.906836  | 0.458993  |
| 6                                                                                | -0.242036 | 2.277449  | -1.341994 | 6                                                                                                            | -0.165184 | 3.269617  | 0.223000  |
| 6                                                                                | -0.664126 | 1.470674  | -2.381896 | 6                                                                                                            | 0.460374  | 3.884414  | -0.856178 |
| 6                                                                                | -0.031174 | 0.240260  | -2.619643 | 6                                                                                                            | 1.278020  | 3.141084  | -1.702962 |
| 6                                                                                | 1.053529  | -0.162599 | -1.820553 | 6                                                                                                            | 1.465609  | 1.778902  | -1.482425 |
| 1                                                                                | 1.116736  | 2.499540  | 0.317027  | 1                                                                                                            | -0.475666 | 1.429808  | 1.303057  |

|                                   |           |           |           |                                   |           |           |           |
|-----------------------------------|-----------|-----------|-----------|-----------------------------------|-----------|-----------|-----------|
| 1                                 | -0.732246 | 3.223405  | -1.150141 | 1                                 | -0.796508 | 3.843214  | 0.891747  |
| 1                                 | -1.487392 | 1.777377  | -3.014667 | 1                                 | 0.323471  | 4.944684  | -1.029640 |
| 1                                 | -0.285025 | -0.338573 | -3.499966 | 1                                 | 1.774117  | 3.614490  | -2.541955 |
| 1                                 | 1.637572  | -1.036262 | -2.083030 | 1                                 | 2.109422  | 1.201258  | -2.133758 |
| 16                                | -2.986143 | -1.152631 | -0.440612 | 16                                | -1.618178 | -0.395877 | -1.767332 |
| 6                                 | -2.524338 | 0.296621  | 0.497734  | 6                                 | -2.395136 | -0.037819 | -0.207590 |
| 6                                 | -1.523205 | 0.237482  | 1.479257  | 6                                 | -2.227553 | -0.888816 | 0.893903  |
| 6                                 | -3.151386 | 1.526520  | 0.267192  | 6                                 | -3.146138 | 1.129529  | -0.043521 |
| 6                                 | -1.152809 | 1.375252  | 2.187033  | 6                                 | -2.780417 | -0.565216 | 2.128329  |
| 1                                 | -1.044961 | -0.709172 | 1.703633  | 1                                 | -1.672932 | -1.814879 | 0.780056  |
| 6                                 | -2.781312 | 2.661508  | 0.980833  | 6                                 | -3.703730 | 1.445724  | 1.190648  |
| 1                                 | -3.928950 | 1.587417  | -0.485849 | 1                                 | -3.271137 | 1.799404  | -0.886145 |
| 6                                 | -1.774516 | 2.596090  | 1.940123  | 6                                 | -3.517777 | 0.605277  | 2.284683  |
| 1                                 | -0.371495 | 1.303809  | 2.935931  | 1                                 | -2.633521 | -1.232894 | 2.969331  |
| 1                                 | -3.280864 | 3.603158  | 0.781375  | 1                                 | -4.276724 | 2.359581  | 1.298448  |
| 1                                 | -1.484014 | 3.481872  | 2.492236  | 1                                 | -3.944375 | 0.857772  | 3.247723  |
| 8                                 | 0.207767  | -2.493756 | 0.291373  | 8                                 | 0.393561  | -2.711433 | -0.759961 |
| 1                                 | -0.425458 | -2.878079 | 0.934831  | 1                                 | -0.456395 | -3.172601 | -0.969270 |
| 1                                 | 1.027483  | -2.321848 | 0.763990  | 1                                 | 0.896076  | -3.254719 | -0.144803 |
| 8                                 | -1.886232 | -3.143424 | 1.843179  | 8                                 | -2.052264 | -3.536421 | -1.280140 |
| 1                                 | -2.248865 | -4.032364 | 1.896723  | 1                                 | -2.257898 | -4.158117 | -1.984830 |
| 1                                 | -2.479669 | -2.649083 | 1.245108  | 1                                 | -2.266356 | -2.653205 | -1.629283 |
| <b>V-PCoA</b>                     |           |           |           | <b>VI-RCoA</b>                    |           |           |           |
| E = -2666.0825569 (-2666.1387625) |           |           |           | E = -3895.8842714 (-3895.9367735) |           |           |           |
| Nimag = 0                         |           |           |           | Nimag = 0                         |           |           |           |
| Tc = 0.182784                     |           |           |           | Tc = 0.256852                     |           |           |           |
| 29                                | 1.383608  | 1.001528  | -0.375376 | 29                                | 0.102003  | 0.244201  | 0.152479  |
| 53                                | 2.516104  | -1.397985 | 0.136299  | 53                                | -3.333600 | -1.207987 | -0.857842 |
| 6                                 | -1.379606 | 1.766625  | 0.762047  | 6                                 | -1.401843 | -1.864264 | -0.281064 |
| 6                                 | -0.773402 | 1.267246  | 1.926864  | 6                                 | -0.951420 | -1.604540 | 1.016170  |
| 6                                 | 0.549474  | 1.560426  | 2.191639  | 6                                 | 0.323772  | -2.055821 | 1.381936  |
| 6                                 | 1.284307  | 2.392187  | 1.324516  | 6                                 | 1.088928  | -2.812253 | 0.500865  |
| 6                                 | 0.651831  | 2.956414  | 0.207266  | 6                                 | 0.601216  | -3.095456 | -0.769867 |
| 6                                 | -0.684968 | 2.619283  | -0.081531 | 6                                 | -0.640100 | -2.612854 | -1.173739 |
| 1                                 | -1.337255 | 0.622085  | 2.589749  | 1                                 | -1.584956 | -1.110224 | 1.741380  |
| 1                                 | 1.027831  | 1.152103  | 3.072607  | 1                                 | 0.689327  | -1.834203 | 2.377866  |
| 1                                 | 2.302330  | 2.666464  | 1.569756  | 1                                 | 2.072757  | -3.156350 | 0.798141  |
| 1                                 | 1.171899  | 3.671155  | -0.418045 | 1                                 | 1.197078  | -3.676066 | -1.463885 |
| 1                                 | -1.152839 | 3.008748  | -0.977477 | 1                                 | -1.009113 | -2.816235 | -2.170698 |
| 16                                | -3.045475 | 1.278742  | 0.346222  | 16                                | 1.918762  | 0.294862  | -1.293767 |
| 6                                 | -2.835871 | -0.500612 | 0.243844  | 6                                 | 3.147139  | -0.659636 | -0.442545 |
| 6                                 | -1.654070 | -1.075823 | -0.223003 | 6                                 | 3.400737  | -0.473667 | 0.921964  |
| 6                                 | -3.914813 | -1.306886 | 0.600167  | 6                                 | 3.866241  | -1.648525 | -1.121975 |
| 6                                 | -1.548676 | -2.458126 | -0.311154 | 6                                 | 4.327752  | -1.265809 | 1.589111  |
| 1                                 | -0.803510 | -0.461399 | -0.492958 | 1                                 | 2.853569  | 0.290720  | 1.464139  |
| 6                                 | -3.807904 | -2.689763 | 0.484281  | 6                                 | 4.793528  | -2.441375 | -0.453264 |
| 1                                 | -4.827199 | -0.858619 | 0.975778  | 1                                 | 3.675293  | -1.805945 | -2.177463 |
| 6                                 | -2.626229 | -3.269386 | 0.034084  | 6                                 | 5.026565  | -2.259947 | 0.907428  |
| 1                                 | -0.614781 | -2.890348 | -0.651920 | 1                                 | 4.502370  | -1.107436 | 2.647478  |



|                                                                                            |           |           |           |                                                                                   |           |           |           |
|--------------------------------------------------------------------------------------------|-----------|-----------|-----------|-----------------------------------------------------------------------------------|-----------|-----------|-----------|
| 1                                                                                          | -4.648387 | -3.313217 | 0.764767  | 1                                                                                 | 5.331294  | -3.209265 | -0.998203 |
| 1                                                                                          | -2.542078 | -4.346726 | -0.039556 | 1                                                                                 | 5.744762  | -2.880971 | 1.428778  |
| 8                                                                                          | 0.732234  | 0.592657  | -2.293078 | 16                                                                                | -1.220645 | 2.551113  | -0.183634 |
| 1                                                                                          | -0.184815 | 0.831505  | -2.546500 | 6                                                                                 | -1.148937 | 1.812242  | 1.431540  |
| 1                                                                                          | 0.875836  | -0.312416 | -2.587240 | 6                                                                                 | 0.078487  | 1.635708  | 2.106822  |
| 8                                                                                          | -1.836385 | 1.296692  | -2.778200 | 6                                                                                 | -2.323607 | 1.393101  | 2.083722  |
| 1                                                                                          | -2.432947 | 1.256127  | -2.017363 | 6                                                                                 | 0.118689  | 1.024001  | 3.361866  |
| 1                                                                                          | -2.311884 | 0.879278  | -3.502971 | 1                                                                                 | 0.980918  | 2.072479  | 1.689803  |
|                                                                                            |           |           |           | 6                                                                                 | -2.272345 | 0.795361  | 3.333329  |
|                                                                                            |           |           |           | 1                                                                                 | -3.274756 | 1.537133  | 1.584977  |
|                                                                                            |           |           |           | 6                                                                                 | -1.047591 | 0.586182  | 3.974206  |
|                                                                                            |           |           |           | 1                                                                                 | 1.074504  | 0.899910  | 3.859306  |
|                                                                                            |           |           |           | 1                                                                                 | -3.193236 | 0.481189  | 3.811798  |
|                                                                                            |           |           |           | 1                                                                                 | -1.011303 | 0.111326  | 4.946756  |
|                                                                                            |           |           |           | 19                                                                                | 1.621382  | 3.309137  | -2.031331 |
|                                                                                            |           |           |           | 8                                                                                 | 1.457066  | 4.236888  | 0.415811  |
|                                                                                            |           |           |           | 1                                                                                 | 1.613265  | 4.731138  | 1.224149  |
|                                                                                            |           |           |           | 8                                                                                 | -0.194931 | 1.639782  | -3.219584 |
|                                                                                            |           |           |           | 1                                                                                 | -0.745060 | 1.543319  | -2.428934 |
|                                                                                            |           |           |           | 1                                                                                 | 0.533079  | 3.933368  | 0.455669  |
|                                                                                            |           |           |           | 1                                                                                 | 0.276412  | 0.800356  | -3.282466 |
| <b>VI-TSoA</b><br>E = -3895.8494208 (-3895.9014235)<br>Nimag = 1 (-87.69)<br>Tc = 0.259988 |           |           |           | <b>VI-PCoA</b><br>E = -3895.9156633 (-3895.9784947)<br>Nimag = 0<br>Tc = 0.256953 |           |           |           |
| 29                                                                                         | -0.337450 | -0.278859 | -0.614829 | 29                                                                                | -1.461420 | -0.369326 | 0.311069  |
| 53                                                                                         | -0.398690 | -2.718130 | -1.507481 | 53                                                                                | -2.052888 | -2.922270 | -0.597366 |
| 6                                                                                          | 1.305630  | -1.157568 | -0.035761 | 6                                                                                 | 0.963384  | -0.089245 | 1.399165  |
| 6                                                                                          | 1.224902  | -1.529497 | 1.297465  | 6                                                                                 | -0.219834 | 0.412578  | 1.973924  |
| 6                                                                                          | 2.410818  | -1.713179 | 2.009952  | 6                                                                                 | -1.085673 | -0.466990 | 2.635498  |
| 6                                                                                          | 3.639669  | -1.555159 | 1.380499  | 6                                                                                 | -0.710189 | -1.797349 | 2.849289  |
| 6                                                                                          | 3.691910  | -1.200346 | 0.035198  | 6                                                                                 | 0.490574  | -2.261336 | 2.336458  |
| 6                                                                                          | 2.518799  | -0.998015 | -0.685014 | 6                                                                                 | 1.316984  | -1.421431 | 1.588132  |
| 1                                                                                          | 0.268452  | -1.698655 | 1.781387  | 1                                                                                 | -0.440494 | 1.474023  | 1.931237  |
| 1                                                                                          | 2.359015  | -1.993892 | 3.055934  | 1                                                                                 | -1.991311 | -0.073910 | 3.083035  |
| 1                                                                                          | 4.557386  | -1.711556 | 1.934709  | 1                                                                                 | -1.365487 | -2.459980 | 3.399734  |
| 1                                                                                          | 4.647024  | -1.064424 | -0.458661 | 1                                                                                 | 0.786237  | -3.291350 | 2.492246  |
| 1                                                                                          | 2.558088  | -0.714365 | -1.729937 | 1                                                                                 | 2.235929  | -1.806651 | 1.164774  |
| 16                                                                                         | 0.428878  | 1.908456  | -0.610814 | 16                                                                                | 1.942580  | 1.089457  | 0.484929  |
| 6                                                                                          | 2.116966  | 1.985475  | -0.089709 | 6                                                                                 | 3.534336  | 0.280176  | 0.383746  |
| 6                                                                                          | 2.448290  | 1.781168  | 1.253106  | 6                                                                                 | 4.514676  | 0.580697  | 1.327590  |
| 6                                                                                          | 3.137170  | 2.246587  | -1.009501 | 6                                                                                 | 3.797660  | -0.616393 | -0.651908 |
| 6                                                                                          | 3.774351  | 1.830506  | 1.664102  | 6                                                                                 | 5.765726  | -0.020271 | 1.232825  |
| 1                                                                                          | 1.659023  | 1.566989  | 1.965510  | 1                                                                                 | 4.295701  | 1.278130  | 2.126998  |
| 6                                                                                          | 4.462417  | 2.305110  | -0.592541 | 6                                                                                 | 5.050973  | -1.215009 | -0.736780 |
| 1                                                                                          | 2.882855  | 2.396805  | -2.052445 | 1                                                                                 | 3.011626  | -0.864134 | -1.357075 |
| 6                                                                                          | 4.786651  | 2.093412  | 0.744753  | 6                                                                                 | 6.034328  | -0.915175 | 0.200908  |
| 1                                                                                          | 4.018640  | 1.655120  | 2.705792  | 1                                                                                 | 6.529791  | 0.211081  | 1.965014  |
| 1                                                                                          | 5.243849  | 2.508050  | -1.316062 | 1                                                                                 | 5.256661  | -1.916570 | -1.536230 |

|                                                                                              |           |           |           |                                                                                                       |           |           |           |
|----------------------------------------------------------------------------------------------|-----------|-----------|-----------|-------------------------------------------------------------------------------------------------------|-----------|-----------|-----------|
| 1                                                                                            | 5.820292  | 2.130494  | 1.068018  | 1                                                                                                     | 7.010065  | -1.380522 | 0.128894  |
| 16                                                                                           | -2.655536 | 0.312811  | -0.546468 | 16                                                                                                    | -1.774626 | 1.227888  | -1.391853 |
| 6                                                                                            | -2.327671 | -0.299863 | 1.103918  | 6                                                                                                     | -1.873089 | 2.426315  | -0.077752 |
| 6                                                                                            | -1.682762 | 0.506689  | 2.054511  | 6                                                                                                     | -0.942580 | 3.464498  | 0.042142  |
| 6                                                                                            | -2.692698 | -1.602204 | 1.474973  | 6                                                                                                     | -2.856703 | 2.298346  | 0.914179  |
| 6                                                                                            | -1.393607 | 0.019474  | 3.324990  | 6                                                                                                     | -0.977110 | 4.328330  | 1.134306  |
| 1                                                                                            | -1.382271 | 1.510322  | 1.777852  | 1                                                                                                     | -0.180569 | 3.584240  | -0.720106 |
| 6                                                                                            | -2.399939 | -2.086106 | 2.744388  | 6                                                                                                     | -2.890344 | 3.163185  | 2.001303  |
| 1                                                                                            | -3.192559 | -2.234845 | 0.750878  | 1                                                                                                     | -3.603935 | 1.517706  | 0.819050  |
| 6                                                                                            | -1.746080 | -1.280429 | 3.675335  | 6                                                                                                     | -1.943620 | 4.178491  | 2.124714  |
| 1                                                                                            | -0.886974 | 0.658403  | 4.039216  | 1                                                                                                     | -0.238683 | 5.118376  | 1.212423  |
| 1                                                                                            | -2.683836 | -3.098478 | 3.007923  | 1                                                                                                     | -3.656908 | 3.039887  | 2.758137  |
| 1                                                                                            | -1.516891 | -1.662694 | 4.662619  | 1                                                                                                     | -1.963952 | 4.846415  | 2.977010  |
| 19                                                                                           | -2.318603 | 3.647298  | -0.590280 | 19                                                                                                    | 1.161408  | 1.292467  | -2.797749 |
| 8                                                                                            | -3.913430 | 2.737137  | 1.369101  | 8                                                                                                     | -0.411566 | 3.350131  | -3.394830 |
| 1                                                                                            | -3.719919 | 2.634034  | 2.305144  | 1                                                                                                     | -0.563581 | 4.297542  | -3.350690 |
| 8                                                                                            | -1.497436 | 2.768919  | -3.007624 | 8                                                                                                     | 0.858855  | -1.234727 | -2.090143 |
| 1                                                                                            | -1.882675 | 1.961203  | -3.360065 | 1                                                                                                     | 0.911550  | -2.047187 | -2.602717 |
| 1                                                                                            | -3.893466 | 1.837575  | 1.015186  | 1                                                                                                     | -1.149591 | 2.941016  | -2.916152 |
| 1                                                                                            | -0.621386 | 2.503960  | -2.690424 | 1                                                                                                     | 0.151869  | -1.411447 | -1.454863 |
| <b>VI-RC<sub>RE</sub></b><br>E = -4514.3020647 (-4514.3516302)<br>Nimag = 0<br>Tc = 0.351231 |           |           |           | <b>VI-TS<sub>RE</sub></b><br>E = -4514.2984466 (-4514.3484266)<br>Nimag = 1(-157.33)<br>Tc = 0.351759 |           |           |           |
| 29                                                                                           | 0.169773  | -0.494447 | -0.689273 | 29                                                                                                    | -0.139026 | 0.736023  | -0.715674 |
| 6                                                                                            | -1.511975 | 0.417827  | -0.709640 | 6                                                                                                     | 1.329405  | -0.548114 | -0.685854 |
| 6                                                                                            | -1.985376 | 0.853833  | -1.935795 | 6                                                                                                     | 1.829252  | -0.950211 | -1.915859 |
| 6                                                                                            | -3.212206 | 1.518379  | -1.988761 | 6                                                                                                     | 3.125511  | -1.459543 | -1.981711 |
| 6                                                                                            | -3.941883 | 1.735886  | -0.825689 | 6                                                                                                     | 3.889992  | -1.580724 | -0.826705 |
| 6                                                                                            | -3.449825 | 1.287623  | 0.397555  | 6                                                                                                     | 3.373393  | -1.164153 | 0.397907  |
| 6                                                                                            | -2.227992 | 0.622790  | 0.458007  | 6                                                                                                     | 2.087311  | -0.642709 | 0.474660  |
| 1                                                                                            | -1.421312 | 0.690737  | -2.847906 | 1                                                                                                     | 1.215532  | -0.901184 | -2.808137 |
| 1                                                                                            | -3.589810 | 1.864504  | -2.944626 | 1                                                                                                     | 3.524005  | -1.777264 | -2.938504 |
| 1                                                                                            | -4.892598 | 2.254191  | -0.870886 | 1                                                                                                     | 4.889941  | -1.994676 | -0.880038 |
| 1                                                                                            | -4.012807 | 1.454502  | 1.309094  | 1                                                                                                     | 3.974255  | -1.234043 | 1.297199  |
| 1                                                                                            | -1.846238 | 0.274593  | 1.413156  | 1                                                                                                     | 1.676874  | -0.329349 | 1.429762  |
| 16                                                                                           | 1.169472  | 1.483994  | -0.243344 | 16                                                                                                    | -0.891643 | -1.354975 | -0.422961 |
| 6                                                                                            | 0.044224  | 2.708620  | 0.378493  | 6                                                                                                     | -0.034776 | -2.767070 | 0.247548  |
| 6                                                                                            | -0.612362 | 3.569394  | -0.504480 | 6                                                                                                     | 0.526307  | -3.706868 | -0.618241 |
| 6                                                                                            | -0.174861 | 2.846977  | 1.751380  | 6                                                                                                     | 0.032064  | -2.965579 | 1.626368  |
| 6                                                                                            | -1.488264 | 4.534536  | -0.023227 | 6                                                                                                     | 1.164974  | -4.828733 | -0.103828 |
| 1                                                                                            | -0.443694 | 3.463876  | -1.569345 | 1                                                                                                     | 0.470255  | -3.545217 | -1.687951 |
| 6                                                                                            | -1.046088 | 3.819086  | 2.231272  | 6                                                                                                     | 0.668170  | -4.092627 | 2.135709  |
| 1                                                                                            | 0.327196  | 2.183212  | 2.445255  | 1                                                                                                     | -0.393330 | -2.234008 | 2.302119  |
| 6                                                                                            | -1.710568 | 4.661464  | 1.345636  | 6                                                                                                     | 1.239042  | -5.023325 | 1.273159  |
| 1                                                                                            | -2.000416 | 5.188128  | -0.719981 | 1                                                                                                     | 1.603384  | -5.552657 | -0.780475 |
| 1                                                                                            | -1.209780 | 3.912688  | 3.298614  | 1                                                                                                     | 0.720246  | -4.239627 | 3.207859  |
| 1                                                                                            | -2.395342 | 5.413505  | 1.719275  | 1                                                                                                     | 1.736838  | -5.898820 | 1.672080  |
| 16                                                                                           | -0.957408 | -2.473368 | -0.822225 | 16                                                                                                    | 1.077886  | 2.750526  | -0.642940 |

|                                  |           |           |           |    |           |           |           |
|----------------------------------|-----------|-----------|-----------|----|-----------|-----------|-----------|
| 6                                | -2.660695 | -2.333363 | -0.336197 | 6  | 2.749250  | 2.344077  | -0.206059 |
| 6                                | -3.033850 | -2.545242 | 0.994120  | 6  | 3.175946  | 2.440750  | 1.123753  |
| 6                                | -3.643922 | -2.028054 | -1.280313 | 6  | 3.667649  | 1.933501  | -1.176798 |
| 6                                | -4.366695 | -2.433782 | 1.375264  | 6  | 4.487189  | 2.135363  | 1.472114  |
| 1                                | -2.275606 | -2.778688 | 1.733138  | 1  | 2.469583  | 2.750633  | 1.886160  |
| 6                                | -4.973527 | -1.912840 | -0.894641 | 6  | 4.976303  | 1.624740  | -0.825176 |
| 1                                | -3.355649 | -1.862974 | -2.311439 | 1  | 3.343883  | 1.848436  | -2.207558 |
| 6                                | -5.339504 | -2.111356 | 0.434470  | 6  | 5.393628  | 1.724677  | 0.499129  |
| 1                                | -4.642140 | -2.595776 | 2.410944  | 1  | 4.799274  | 2.216763  | 2.507225  |
| 1                                | -5.726361 | -1.664603 | -1.634026 | 1  | 5.671416  | 1.295545  | -1.589649 |
| 1                                | -6.376817 | -2.019125 | 0.733504  | 1  | 6.414583  | 1.482282  | 0.770032  |
| 16                               | 2.141702  | -1.760685 | -0.878693 | 16 | -2.157756 | 1.943856  | -0.924196 |
| 6                                | 3.585903  | -0.720983 | -0.934736 | 6  | -3.564677 | 0.856684  | -0.909078 |
| 6                                | 4.642195  | -0.948686 | -0.043469 | 6  | -4.626841 | 1.096434  | -0.025239 |
| 6                                | 3.719394  | 0.301889  | -1.880842 | 6  | -3.661338 | -0.236078 | -1.779873 |
| 6                                | 5.790196  | -0.161841 | -0.083961 | 6  | -5.738734 | 0.259233  | -0.000834 |
| 1                                | 4.569531  | -1.756338 | 0.677979  | 1  | -4.579109 | 1.948182  | 0.645614  |
| 6                                | 4.866479  | 1.085628  | -1.917709 | 6  | -4.773834 | -1.069885 | -1.753012 |
| 1                                | 2.916205  | 0.480335  | -2.585849 | 1  | -2.860165 | -0.424261 | -2.484577 |
| 6                                | 5.905426  | 0.862449  | -1.017557 | 6  | -5.816445 | -0.830990 | -0.862076 |
| 1                                | 6.595077  | -0.356441 | 0.615262  | 1  | -6.546851 | 0.466460  | 0.691164  |
| 1                                | 4.949357  | 1.874510  | -2.656430 | 1  | -4.825399 | -1.909770 | -2.436299 |
| 1                                | 6.797743  | 1.475815  | -1.048739 | 1  | -6.682101 | -1.481773 | -0.844555 |
| 19                               | 2.479489  | -0.221667 | 2.207662  | 19 | -2.483359 | 0.166582  | 2.053780  |
| 8                                | 0.182148  | -1.752737 | 2.271543  | 8  | -0.098534 | 1.546236  | 2.221586  |
| 1                                | 0.845551  | -2.438944 | 2.443554  | 1  | -0.725791 | 2.244996  | 2.464789  |
| 8                                | 2.679663  | -2.941322 | 2.070105  | 8  | -2.528656 | 2.886959  | 2.128669  |
| 1                                | 3.187283  | -3.715255 | 2.330536  | 1  | -3.009450 | 3.652597  | 2.455213  |
| 1                                | 2.588079  | -2.976198 | 1.102076  | 1  | -2.465662 | 2.983989  | 1.161264  |
| 1                                | -0.221278 | -2.043607 | 1.440095  | 1  | 0.362654  | 1.933843  | 1.459470  |
| <b>VI-PCRE</b>                   |           |           |           |    |           |           |           |
| E = -4514.346925 (-4514.4052455) |           |           |           |    |           |           |           |
| Nimag = 0                        |           |           |           |    |           |           |           |
| Tc = 0.348441                    |           |           |           |    |           |           |           |
| 29                               | -0.594201 | -1.052826 | -0.626482 |    |           |           |           |
| 6                                | 0.117192  | 1.026295  | -1.078563 |    |           |           |           |
| 6                                | 0.316828  | 1.098791  | -2.469598 |    |           |           |           |
| 6                                | -0.771278 | 1.197631  | -3.319637 |    |           |           |           |
| 6                                | -2.069835 | 1.278689  | -2.801462 |    |           |           |           |
| 6                                | -2.278214 | 1.232270  | -1.434137 |    |           |           |           |
| 6                                | -1.191807 | 1.069940  | -0.560337 |    |           |           |           |
| 1                                | 1.328264  | 1.100375  | -2.856590 |    |           |           |           |
| 1                                | -0.610372 | 1.246576  | -4.389494 |    |           |           |           |
| 1                                | -2.911810 | 1.393834  | -3.472841 |    |           |           |           |
| 1                                | -3.277284 | 1.316704  | -1.022686 |    |           |           |           |
| 1                                | -1.346413 | 1.154602  | 0.511007  |    |           |           |           |
| 16                               | 1.523608  | 1.218680  | 0.014531  |    |           |           |           |
| 6                                | 1.261497  | 2.884166  | 0.615387  |    |           |           |           |
| 6                                | 0.516206  | 3.837899  | -0.076266 |    |           |           |           |

|    |           |           |           |
|----|-----------|-----------|-----------|
| 6  | 1.903625  | 3.226886  | 1.805707  |
| 6  | 0.406565  | 5.126433  | 0.437228  |
| 1  | 0.020205  | 3.583098  | -1.005432 |
| 6  | 1.796941  | 4.520703  | 2.302972  |
| 1  | 2.481926  | 2.484209  | 2.344428  |
| 6  | 1.044701  | 5.473894  | 1.623591  |
| 1  | -0.178239 | 5.862754  | -0.101079 |
| 1  | 2.297788  | 4.778405  | 3.228423  |
| 1  | 0.955476  | 6.479235  | 2.016190  |
| 16 | -2.445821 | -2.387333 | -0.063758 |
| 6  | -3.709832 | -1.166140 | 0.177993  |
| 6  | -3.683210 | -0.296445 | 1.275962  |
| 6  | -4.755682 | -1.035176 | -0.743131 |
| 6  | -4.645047 | 0.697003  | 1.424259  |
| 1  | -2.886276 | -0.394026 | 2.006163  |
| 6  | -5.721187 | -0.044804 | -0.591560 |
| 1  | -4.792062 | -1.705056 | -1.594569 |
| 6  | -5.667770 | 0.833600  | 0.487743  |
| 1  | -4.595400 | 1.366309  | 2.275793  |
| 1  | -6.514934 | 0.044565  | -1.324808 |
| 1  | -6.415347 | 1.609222  | 0.601932  |
| 16 | 1.225713  | -2.546847 | -0.519219 |
| 6  | 2.767621  | -1.759671 | -0.915196 |
| 6  | 3.805627  | -1.704911 | 0.023577  |
| 6  | 2.975922  | -1.173254 | -2.169228 |
| 6  | 4.994621  | -1.043459 | -0.266902 |
| 1  | 3.683103  | -2.197583 | 0.983408  |
| 6  | 4.165206  | -0.513567 | -2.458095 |
| 1  | 2.193215  | -1.240289 | -2.916613 |
| 6  | 5.177375  | -0.433454 | -1.505087 |
| 1  | 5.781582  | -1.007465 | 0.478018  |
| 1  | 4.301289  | -0.061201 | -3.434309 |
| 1  | 6.101870  | 0.084443  | -1.729254 |
| 19 | 1.399433  | -0.987373 | 2.498671  |
| 8  | -0.805074 | -2.485038 | 2.819516  |
| 1  | -0.188280 | -3.226703 | 2.737524  |
| 8  | 1.719176  | -3.674572 | 2.388186  |
| 1  | 2.220841  | -4.460072 | 2.622344  |
| 1  | 1.677269  | -3.645568 | 1.413419  |
| 1  | -1.389026 | -2.549339 | 2.044475  |
